# Supplementary material for: Retracted Article: Novel mesoporous amorphous B–N–O–H nanofoam as an electrode for capacitive dye removal from water
Source: Royal Society of Chemistry journal article supplement (doi:10.1039/c7ta04927g), 2017-01-01
Supplement: c7ta04927g1.pdf [file c7ta04927g1.pdf]

### Supporting Information

Novel mesoporous amorphous B-N-O-H nanofoam as electrode for capacitive dye removal from water

Ming Ming Chen,<sup>a,b</sup> Da Wei,<sup>a,b</sup> Wei Chu,<sup>c</sup> Li Ping Hou<sup>a,b</sup> and Dong Ge Tong<sup>a,b\*</sup>

<sup>a</sup> State Key Laboratory of Geohazard Prevention and Geoenvironment Protection, Chengdu University of Technology, Chengdu 610059, China. E-mail: tongdongge@163.com; Fax: +86 28 8407 8940

<sup>b</sup> Collaborative Innovation Center of Panxi Strategic Mineral Resources Multi-purpose Utilization, College of Materials and Chemistry & Chemical Engineering, Chengdu University of Technology, Chengdu 610059, China.

<sup>c</sup> School of Chemical Engineering & Institute of New Energy and Low Carbon Technology, Sichuan University, Chengdu 610065, China. E-mail: chuwei1965@foxmail.com; Fax: +86 28 8540 3397

Summary: 72 Pages; 40 Tables; 32 Figures

## Table of Contents

|                 |    |
|-----------------|----|
| Table S1 .....  | 4  |
| Table S2 .....  | 5  |
| Table S3 .....  | 6  |
| Table S4 .....  | 9  |
| Table S5 .....  | 10 |
| Table S6 .....  | 11 |
| Table S7 .....  | 12 |
| Table S8 .....  | 12 |
| Table S9 .....  | 12 |
| Table S10 ..... | 13 |
| Table S11 ..... | 13 |
| Table S12.....  | 14 |
| Table S13 ..... | 15 |
| Table S14 ..... | 16 |
| Table S15 ..... | 17 |
| Table S16 ..... | 18 |
| Table S17 ..... | 19 |
| Table S18 ..... | 20 |
| Table S19 ..... | 21 |
| Table S20 ..... | 22 |
| Table S21 ..... | 23 |
| Table S22 ..... | 24 |
| Table S23 ..... | 25 |
| Table S24 ..... | 26 |
| Table S25 ..... | 27 |
| Table S26 ..... | 28 |
| Table S27 ..... | 29 |
| Table S28 ..... | 30 |
| Table S29 ..... | 31 |
| Table S30 ..... | 32 |
| Table S31 ..... | 33 |
| Table S32.....  | 34 |
| Table S33 ..... | 35 |
| Table S34 ..... | 36 |
| Table S35 ..... | 38 |
| Table S36.....  | 39 |
| Table S37 ..... | 40 |
| Table S38 ..... | 41 |
| Table S39 ..... | 42 |
| Table S40.....  | 43 |
| Fig.S1 .....    | 44 |
| Fig.S2 .....    | 44 |
| Fig.S3 .....    | 45 |

|               |    |
|---------------|----|
| Fig.S4 .....  | 45 |
| Fig.S5 .....  | 46 |
| Fig.S6 .....  | 46 |
| Fig.S7 .....  | 47 |
| Fig.S8 .....  | 48 |
| Fig.S9 .....  | 49 |
| Fig.S10 ..... | 50 |
| Fig.S11 ..... | 51 |
| Fig.S12 ..... | 52 |
| Fig.S13 ..... | 53 |
| Fig.S14 ..... | 54 |
| Fig.S15 ..... | 55 |
| Fig.S16 ..... | 56 |
| Fig.S17 ..... | 57 |
| Fig.S18 ..... | 58 |
| Fig.S19 ..... | 59 |
| Fig.S20 ..... | 60 |
| Fig.S21 ..... | 61 |
| Fig.S22 ..... | 62 |
| Fig.S23 ..... | 63 |
| Fig.S24 ..... | 64 |
| Fig.S25 ..... | 65 |
| Fig.S26 ..... | 66 |
| Fig.S27 ..... | 67 |
| Fig.S28 ..... | 68 |
| Fig.S29 ..... | 69 |
| Fig.S30 ..... | 70 |
| Fig.S31 ..... | 71 |
| Fig.S32 ..... | 72 |

**Table S1** Textural properties of mesoporous B-N-O-H nanofoams and their mother mesoporous CuB<sub>23</sub> templates.

| Samples           | $d_{100}$ / nm | $a_0$ / nm        |                   | $S_{\text{BET}}$ / m <sup>2</sup> g <sup>-1</sup> | Pore size / nm               |                              | Wall thickness / nm          |                              | Pore volume / cm <sup>3</sup> g <sup>-1</sup> |
|-------------------|----------------|-------------------|-------------------|---------------------------------------------------|------------------------------|------------------------------|------------------------------|------------------------------|-----------------------------------------------|
|                   |                | $a_0^{\text{a}}$  | $a_0^{\text{b}}$  |                                                   | $d_{\text{pore}}^{\text{c}}$ | $d_{\text{pore}}^{\text{d}}$ | $t_{\text{wall}}^{\text{f}}$ | $t_{\text{wall}}^{\text{g}}$ |                                               |
| CuB <sub>23</sub> | 4.38*          | 5.05 <sup>a</sup> | 5.11 <sup>b</sup> | 645                                               | 2.0 <sup>c</sup>             | 2.0 <sup>e</sup>             | 3.1 <sup>f</sup>             | 3.1 <sup>g</sup>             | 1.58                                          |
| B-N-O-H nanofoams | 5.81*          | 6.71 <sup>a</sup> | 6.22 <sup>b</sup> | 1023                                              | 3.7 <sup>d</sup>             | 3.7 <sup>e</sup>             | 2.5 <sup>f</sup>             | 2.5 <sup>g</sup>             | 3.53                                          |

Note: \* $d_{100}$  spacing values were calculated from the Bragg equation (1) :  $2 \times d_{100} = \lambda / \sin\theta_{100}$ ,  $\lambda = 0.15418$  nm;

<sup>a</sup> Cell parameters ( $a_0$ ) were calculated from the cell parameters equation (2) for hexagonal system:  $a_0 = 2 \times d_{100} / (3)^{1/2}$ ;

<sup>b</sup> Cell parameters ( $a_0$ ) were the distance between the centers of two neighboring nanowires by STEM averaged from 300 couples;

<sup>c</sup> Pore diameters obtained from pore size distribution;

<sup>d</sup> Pore diameters averaged from pore size distribution via equation (3): Average pore diameter = Average pore diameter of pore 1  $\times$  the ratio of pore 1 + Average pore diameter of pore 2  $\times$  (1- the ratio of pore 1);

<sup>e</sup> Pore diameters obtained by STEM averaged from 300 pores;

<sup>f</sup> Wall thickness calculated from the wall thickness equation (4) for hexagonal system: Wall thickness =  $a_0$  – pore size

<sup>g</sup> Wall thickness obtained by STEM averaged from 300 points.

**Table S2** Elemental analysis of N and H in B-N-O-H obtained using NH<sub>4</sub>Cl and <sup>15</sup>N and <sup>2</sup>H labeled <sup>15</sup>N<sup>2</sup>H<sub>4</sub>Cl as precursors, respectively.

| <b>Samples</b>                                                                                                        | <b>H/ %</b> | <b>N/%</b> | <b><sup>2</sup>H/%</b> | <b><sup>15</sup>N/%</b> |
|-----------------------------------------------------------------------------------------------------------------------|-------------|------------|------------------------|-------------------------|
| B-N-O-H obtained using NH <sub>4</sub> Cl obtained using NH <sub>4</sub> Cl as precursors                             | 1.076       | 28.382     | -                      | -                       |
| B-N-O-H obtained using NH <sub>4</sub> Cl obtained using <sup>15</sup> N <sup>2</sup> H <sub>4</sub> Cl as precursors | -           | -          | 2.087                  | 29.480                  |

**Table S3** The effect of reaction parameters, including plasma power, reaction temperature, reaction time, NH<sub>4</sub>Cl amounts, Ionic liquids (Ils) volume, Ils kinds, O<sub>2</sub> rate on the yield, specific surface areas, average pore diameters and atom composition of B-N-O-H nanofoams prepared with SPT.

| Samples | Reaction temperature / °C | Reaction time / min | Plasma power / W | NH <sub>4</sub> Cl / mmol <sup>a</sup> | Ils volume / mL | Ils kinds                | O <sub>2</sub> rate / mLmin <sup>-1</sup> | Yield / % | Specific surface areas /m <sup>2</sup> g <sup>-1</sup> | Pore distribution <sup>b</sup> | Average pore diameters / nm <sup>c</sup> | Atom composition                                          |
|---------|---------------------------|---------------------|------------------|----------------------------------------|-----------------|--------------------------|-------------------------------------------|-----------|--------------------------------------------------------|--------------------------------|------------------------------------------|-----------------------------------------------------------|
| 1       | 55                        | 5                   | 20               | 1.87                                   | 30              | [BMIM][PF <sub>6</sub> ] | 10                                        | 100       | 648                                                    | 2.2×0.11+5.3×0.89              | 5.0 <sup>c</sup> (5.0) <sup>d</sup>      | BN <sub>0.452</sub> O <sub>0.308</sub> H <sub>0.240</sub> |
| 2       | 45                        | 5                   | 20               | 1.87                                   | 30              | [BMIM][PF <sub>6</sub> ] | 10                                        | 100       | 806                                                    | 2.2×0.30+5.3×0.70              | 4.4 <sup>c</sup> (4.4) <sup>d</sup>      | BN <sub>0.452</sub> O <sub>0.308</sub> H <sub>0.240</sub> |
| 3       | 35                        | 5                   | 20               | 1.87                                   | 30              | [BMIM][PF <sub>6</sub> ] | 10                                        | 100       | 900                                                    | 2.2×0.42+5.3×0.58              | 4.0 <sup>c</sup> (4.0) <sup>d</sup>      | BN <sub>0.452</sub> O <sub>0.308</sub> H <sub>0.240</sub> |
| 4       | 25                        | 5                   | 20               | 1.87                                   | 30              | [BMIM][PF <sub>6</sub> ] | 10                                        | 100       | 1023                                                   | 2.2×0.52+5.3×0.48              | 3.7 <sup>c</sup> (3.7) <sup>d</sup>      | BN <sub>0.452</sub> O <sub>0.308</sub> H <sub>0.240</sub> |
| 5       | 15                        | 5                   | 20               | 1.87                                   | 30              | [BMIM][PF <sub>6</sub> ] | 10                                        | 82.7      | 1023                                                   | 2.2×0.52+5.3×0.48              | 3.7 <sup>c</sup> (3.7) <sup>d</sup>      | BN <sub>0.452</sub> O <sub>0.308</sub> H <sub>0.240</sub> |
| 6       | 5                         | 5                   | 20               | 1.87                                   | 30              | [BMIM][PF <sub>6</sub> ] | 10                                        | 50.3      | 1023                                                   | 2.2×0.52+5.3×0.48              | 3.7 <sup>c</sup> (3.7) <sup>d</sup>      | BN <sub>0.452</sub> O <sub>0.308</sub> H <sub>0.240</sub> |
| 7       | 25                        | 0.5                 | 20               | 1.87                                   | 30              | [BMIM][PF <sub>6</sub> ] | 10                                        | -         | -                                                      | -                              | -                                        | BN <sub>0.121</sub> O <sub>0.095</sub> H <sub>0.070</sub> |
| 8       | 25                        | 1                   | 20               | 1.87                                   | 30              | [BMIM][PF <sub>6</sub> ] | 10                                        | -         | -                                                      | -                              | -                                        | BN <sub>0.217</sub> O <sub>0.183</sub> H <sub>0.114</sub> |
| 9       | 25                        | 2                   | 20               | 1.87                                   | 30              | [BMIM][PF <sub>6</sub> ] | 10                                        | -         | -                                                      | -                              | -                                        | BN <sub>0.343</sub> O <sub>0.239</sub> H <sub>0.183</sub> |

|    |    |    |    |      |     |                          |    |     |             |                   |                                     |                                                           |
|----|----|----|----|------|-----|--------------------------|----|-----|-------------|-------------------|-------------------------------------|-----------------------------------------------------------|
| 10 | 25 | 10 | 20 | 1.87 | 30  | [BMIM][PF <sub>6</sub> ] | 10 | 100 | 1023        | 2.2×0.52+5.3×0.48 | 3.7 <sup>c</sup> (3.7) <sup>d</sup> | BN <sub>0.452</sub> O <sub>0.308</sub> H <sub>0.240</sub> |
| 11 | 25 | 5  | 18 | 1.87 | 30  | [BMIM][PF <sub>6</sub> ] | 10 | 0   | No products | -                 | -                                   | -                                                         |
| 12 | 25 | 5  | 25 | 1.87 | 30  | [BMIM][PF <sub>6</sub> ] | 10 | 100 | 721         | 2.2×0.20+5.3×0.80 | 4.7 (4.7) <sup>d</sup>              | BN <sub>0.452</sub> O <sub>0.308</sub> H <sub>0.240</sub> |
| 13 | 25 | 5  | 30 | 1.87 | 30  | [BMIM][PF <sub>6</sub> ] | 10 | 100 | 579         | 2.2×0.05+5.3×0.95 | 3.7 <sup>c</sup> (5.2) <sup>d</sup> | BN <sub>0.452</sub> O <sub>0.308</sub> H <sub>0.240</sub> |
| 14 | 25 | 5  | 20 | 1.80 | 30  | [BMIM][PF <sub>6</sub> ] | 10 | 95  | 1023        | 2.2×0.52+5.3×0.48 | 3.7 <sup>c</sup> (3.7) <sup>d</sup> | BN <sub>0.452</sub> O <sub>0.308</sub> H <sub>0.240</sub> |
| 15 | 25 | 5  | 20 | 2.00 | 30  | [BMIM][PF <sub>6</sub> ] | 10 | 100 | 1023        | 2.2×0.52+5.3×0.48 | 3.7 <sup>c</sup> (3.7) <sup>d</sup> | BN <sub>0.452</sub> O <sub>0.308</sub> H <sub>0.240</sub> |
| 16 | 25 | 5  | 20 | 2.50 | 30  | [BMIM][PF <sub>6</sub> ] | 10 | 100 | 1023        | 2.2×0.52+5.3×0.48 | 3.7 <sup>c</sup> (3.7) <sup>d</sup> | BN <sub>0.452</sub> O <sub>0.308</sub> H <sub>0.240</sub> |
| 17 | 25 | 5  | 20 | 1.87 | 50  | [BMIM][PF <sub>6</sub> ] | 10 | 100 | 1023        | 2.2×0.52+5.3×0.48 | 3.7 <sup>c</sup> (3.7) <sup>d</sup> | BN <sub>0.452</sub> O <sub>0.308</sub> H <sub>0.240</sub> |
| 18 | 25 | 5  | 20 | 1.87 | 100 | [BMIM][PF <sub>6</sub> ] | 10 | 100 | 1023        | 2.2×0.52+5.3×0.48 | 3.7 <sup>c</sup> (3.7) <sup>d</sup> | BN <sub>0.452</sub> O <sub>0.308</sub> H <sub>0.240</sub> |
| 19 | 25 | 5  | 20 | 1.87 | 30  | [BMIM]Cl                 | 10 | 100 | 1023        | 2.2×0.52+5.3×0.48 | 3.7 <sup>c</sup> (3.7) <sup>d</sup> | BN <sub>0.452</sub> O <sub>0.308</sub> H <sub>0.240</sub> |
| 20 | 25 | 5  | 20 | 1.87 | 30  | [BMIM][BF <sub>4</sub> ] | 10 | 100 | 1023        | 2.2×0.52+5.3×0.48 | 3.7 <sup>c</sup> (3.7) <sup>d</sup> | BN <sub>0.452</sub> O <sub>0.308</sub> H <sub>0.240</sub> |
| 21 | 25 | 5  | 20 | 1.87 | 30  | [BMIM][PF <sub>6</sub> ] | 8  | 80  | 1023        | 2.2×0.52+5.3×0.48 | 3.7 <sup>c</sup> (3.7) <sup>d</sup> | BN <sub>0.452</sub> O <sub>0.308</sub> H <sub>0.240</sub> |
| 22 | 25 | 5  | 20 | 1.87 | 30  | [BMIM][PF <sub>6</sub> ] | 12 | 100 | 1023        | 2.2×0.52+5.3×0.48 | 3.7 <sup>c</sup> (3.7) <sup>d</sup> | BN <sub>0.452</sub> O <sub>0.308</sub> H <sub>0.240</sub> |
| 23 | 25 | 5  | 20 | 1.87 | 30  | [BMIM][PF <sub>6</sub> ] | 15 | 95  | 1023        | 2.2×0.52+5.3×0.48 | 3.7 <sup>c</sup> (3.7) <sup>d</sup> | BN <sub>0.452</sub> O <sub>0.308</sub> H <sub>0.240</sub> |

Note: <sup>a</sup> The mass of CuB<sub>23</sub> is 50mg;

<sup>b</sup> Pore size distribution obtained from N<sub>2</sub> adsorption/desorption expressed as (Average pore diameter of pore 1 × the ratio of pore 1 + Average

pore diameter of pore 2  $\times$  (1- the ratio of pore 1));

<sup>c</sup> Average pore diameter = Average pore diameter of pore 1  $\times$  the ratio of pore 1 + Average pore diameter of pore 2  $\times$  (1- the ratio of pore 1);

<sup>d</sup> Pore diameters obtained by STEM averaged from 300 pores.



**Table S4** Evaluated model parameters of the adsorption isotherms of B-N-O-H nanofoams over MB at 298 K

| <b>Langmuir model</b>                      | <b>Freundlich model</b>                                        |
|--------------------------------------------|----------------------------------------------------------------|
| $q_m = 3333 \text{ mgg}^{-1}$              | $1/n = 0.3995$                                                 |
| $K_L = 0.004478 \text{ (Lmg}^{-1}\text{)}$ | $K_F = 1.214 \text{ (mgg}^{-1}\text{)(Lmg}^{-1}\text{)}^{1/n}$ |
| $R^2 = 0.9978$                             | $R^2 = 0.9781$                                                 |

**Table S5** Comparison of the adsorption capacity of MB by different adsorbents

| <b>Adsorbents</b>                                                                                                     | <b>CDI or not</b> | <b><math>q_m / \text{m g g}^{-1}</math></b> |
|-----------------------------------------------------------------------------------------------------------------------|-------------------|---------------------------------------------|
| Amorphous $\text{BN}_{0.452}\text{O}_{0.308}\text{H}_{0.240}$ nanofoams in this work obtained at 298 K                | yes               | 3333                                        |
| Amorphous $\text{BN}_{0.452}\text{O}_{0.308}\text{H}_{0.240}$ nanofoams in this work obtained at 308 K                | yes               | 2994                                        |
| Amorphous $\text{BN}_{0.452}\text{O}_{0.308}\text{H}_{0.240}$ nanofoams in this work obtained at 318 K                | yes               | 2898                                        |
| Amorphous $\text{BN}_{0.452}\text{O}_{0.308}\text{H}_{0.240}$ nanofoams in this work obtained at 328 K                | yes               | 2544                                        |
| Amorphous $\text{BN}_{0.452}\text{O}_{0.308}\text{H}_{0.240}$ nanofoams in this work obtained at 25 W of plasma power | yes               | 2659                                        |
| Amorphous $\text{BN}_{0.452}\text{O}_{0.308}\text{H}_{0.240}$ nanofoams in this work obtained at 30 W of plasma power | yes               | 2403                                        |
| Amorphous $\text{BN}_{0.452}\text{O}_{0.308}\text{H}_{0.240}$ in this work                                            | yes               | 922                                         |
| Amorphous $\text{BN}_{0.121}\text{O}_{0.095}\text{H}_{0.070}$ in this work                                            | yes               | 843                                         |
| Amorphous $\text{BN}_{0.217}\text{O}_{0.183}\text{H}_{0.114}$ in this work                                            | yes               | 752                                         |
| Amorphous $\text{BN}_{0.343}\text{O}_{0.239}\text{H}_{0.183}$ in this work                                            | yes               | 660                                         |
| Amorphous BN in this work                                                                                             | yes               | 520                                         |
| Commercial BN                                                                                                         | yes               | 130                                         |
| mesoporous BN fibers                                                                                                  | no                | 631 <sup>5a</sup>                           |
| Porous BN nanosheets                                                                                                  | no                | 313 <sup>5b</sup>                           |
| BN nanonet                                                                                                            | no                | 327.8 <sup>5h</sup>                         |
| BN nanocarpets                                                                                                        | no                | 272.4 <sup>5j</sup>                         |
| MOFs                                                                                                                  | no                | 952 <sup>22a</sup>                          |
| ZJU-24                                                                                                                | no                | 902 <sup>22b</sup>                          |
| BIT-1                                                                                                                 | no                | 810 <sup>22c</sup>                          |
| Amino-MIL-101(Al)                                                                                                     | no                | 762 <sup>22d</sup>                          |
| MIL-100(Fe)                                                                                                           | no                | 736.2 <sup>22e</sup>                        |
| POM@MIL-101                                                                                                           | no                | 371 <sup>22f</sup>                          |
| MOF-235                                                                                                               | no                | 187 <sup>22g</sup>                          |
| Coconut husk activated carbon                                                                                         | no                | 434.78 <sup>22h</sup>                       |

**Table S6** Evaluated model parameters of the adsorption isotherms of B-N-O-H nanofoams over MB at 298 K with different ratios of 2.2 nm pores

| Samples | Pore sizes <sup>a</sup> / nm | Langmuir model                     |                                    |                | Freundlich model |                                                                          |                |
|---------|------------------------------|------------------------------------|------------------------------------|----------------|------------------|--------------------------------------------------------------------------|----------------|
|         |                              | q <sub>m</sub> / mgg <sup>-1</sup> | K <sub>L</sub> / Lmg <sup>-1</sup> | R <sup>2</sup> | 1/n              | K <sub>F</sub> /(m gg <sup>-1</sup> )(Lmg <sup>-1</sup> ) <sup>1/n</sup> | R <sup>2</sup> |
| 1       | 2.2×0.42+5.3<br>×0.58        | 2994                               | 4.304×10 <sup>-3</sup>             | 0.9977         | 0.4118           | 1.222                                                                    | 0.9700         |
| 2       | 2.2×0.30+5.3<br>×0.70        | 2898                               | 3.912×10 <sup>-3</sup>             | 0.9978         | 0.4197           | 1.228                                                                    | 0.9701         |
| 3       | 2.2×0.20+5.3<br>×0.80        | 2659                               | 3.854×10 <sup>-3</sup>             | 0.9979         | 0.4272           | 1.233                                                                    | 0.9701         |
| 4       | 2.2×0.11+5.3<br>×0.89        | 2544                               | 3.793×10 <sup>-3</sup>             | 0.9979         | 0.4336           | 1.239                                                                    | 0.9769         |
| 5       | 2.2×0.05+5.3<br>×0.95        | 2403                               | 3.638×10 <sup>-3</sup>             | 0.9985         | 0.4407           | 1.246                                                                    | 0.9769         |

Note: <sup>a</sup> Pore size distribution obtained from N<sub>2</sub> adsorption/desorption expressed as (Average pore diameter of pore 1 × the ratio of pore 1 + Average pore diameter of pore 2 × (1- the ratio of pore 1))

**Table S7** MB electrosorption dimensionless quantity ( $R_L$ ) over B-N-O-H nanofoams at different initial concentrations

| Initial concentrations / $\text{mgL}^{-1}$ | $R_L$ |
|--------------------------------------------|-------|
| 100                                        | 0.69  |
| 200                                        | 0.52  |
| 300                                        | 0.43  |
| 400                                        | 0.36  |
| 600                                        | 0.27  |
| 800                                        | 0.22  |
| 1000                                       | 0.18  |
| 1200                                       | 0.16  |
| 1500                                       | 0.13  |

**Table S8** Parameters of pseudo-first-order and pseudo-second-order models for the electro-adsorption of MB onto B-N-O-H nanofoams at 298 K

| Pseudo-first-order model                    | Pseudo-second-order model                   |
|---------------------------------------------|---------------------------------------------|
| $C_0 = 600 \text{ mgL}^{-1}$                | $C_0 = 600 \text{ mgL}^{-1}$                |
| $q_{e, \text{exp}} = 1991 \text{ mgg}^{-1}$ | $q_{e, \text{exp}} = 1991 \text{ mgg}^{-1}$ |
| $q_{e, \text{cal}} = 184 \text{ mgg}^{-1}$  | $q_{e, \text{cal}} = 2000 \text{ mgg}^{-1}$ |
| $K_1 = 0.0574$                              | $K_2 = 1.40 \times 10^{-3}$                 |
| $R^2 = 0.7431$                              | $R^2 = 0.9999$                              |

**Table S9** Parameters of pseudo-first-order and pseudo-second-order kinetics in terms of different voltage

| Bias potential / V | Pseudo-first-order                    |                         |        | Pseudo-second-order                   |                                         |        |
|--------------------|---------------------------------------|-------------------------|--------|---------------------------------------|-----------------------------------------|--------|
|                    | $q_{e, \text{cal}} / \text{mgg}^{-1}$ | $K_1 / \text{min}^{-1}$ | $R^2$  | $q_{e, \text{cal}} / \text{mgg}^{-1}$ | $K_2 / \text{gmg}^{-1} \text{min}^{-1}$ | $R^2$  |
| 0                  | 42.89                                 | 0.0439                  | 0.8590 | 312                                   | $3.53 \times 10^{-3}$                   | 0.9997 |
| 0.4                | 75.02                                 | 0.0415                  | 0.8250 | 833                                   | $2.40 \times 10^{-3}$                   | 0.9998 |
| 0.8                | 95.91                                 | 0.0460                  | 0.8473 | 1250                                  | $2.13 \times 10^{-3}$                   | 0.9999 |

**Table S10** Parameters of pseudo-first-order and pseudo-second-order kinetics in terms of different voltage

| Sample | Pore sizes <sup>a</sup> / nm | Pseudo-first-order                     |                                    |                | Pseudo-second-order                    |                                                      |                |
|--------|------------------------------|----------------------------------------|------------------------------------|----------------|----------------------------------------|------------------------------------------------------|----------------|
|        |                              | q <sub>e,cal</sub> / mgg <sup>-1</sup> | K <sub>1</sub> / min <sup>-1</sup> | R <sup>2</sup> | q <sub>e,cal</sub> / mgg <sup>-1</sup> | K <sub>2</sub> / gmg <sup>-1</sup> min <sup>-1</sup> | R <sup>2</sup> |
| 1      | 2.2×0.42+5.3×0.58            | 110.1                                  | 0.0452                             | 0.8551         | 1848                                   | 1.36×10 <sup>-3</sup>                                | 0.9999         |
| 2      | 2.2×0.30+5.3×0.70            | 105.0                                  | 0.0438                             | 0.8250         | 1752                                   | 1.29×10 <sup>-3</sup>                                | 0.9998         |
| 3      | 2.2×0.20+5.3×0.80            | 98.9                                   | 0.0424                             | 0.8451         | 1653                                   | 1.23×10 <sup>-3</sup>                                | 0.9999         |
| 4      | 2.2×0.11+5.3×0.89            | 93.7                                   | 0.0412                             | 0.8451         | 1567                                   | 1.17×10 <sup>-3</sup>                                | 0.9998         |
| 5      | 2.2×0.05+5.3×0.95            | 87.9                                   | 0.0400                             | 0.8450         | 1470                                   | 1.12×10 <sup>-3</sup>                                | 0.9999         |

Note: <sup>a</sup> Pore size distribution obtained from N<sub>2</sub> adsorption/desorption expressed as (Average pore diameter of pore 1 × the ratio of pore 1 + Average pore diameter of pore 2 × (1- the ratio of pore 1))

**Table S11** Thermodynamic parameters for the adsorption of MB onto B-N-O-H nanofoams

| Temperature / K | ΔG/(kJ mol <sup>-1</sup> ) | ΔH/(kJ mol <sup>-1</sup> ) | ΔS/(J mol <sup>-1</sup> ) |
|-----------------|----------------------------|----------------------------|---------------------------|
| 298 K           | -3.971                     | -13.271                    | -31.4                     |
| 308 K           | -3.438                     |                            |                           |
| 318 K           | -3.070                     |                            |                           |
| 328 K           | -2.748                     |                            |                           |

**Table S12** Comparison of Solid state  $^{33}\text{S}$  NMR shifts for B-N-O-H nanofoams, AO7, B-N-O-H nanofoams after being charged in  $600\text{mgL}^{-1}$  AO7 at 0 V and 1.2 V, respectively.

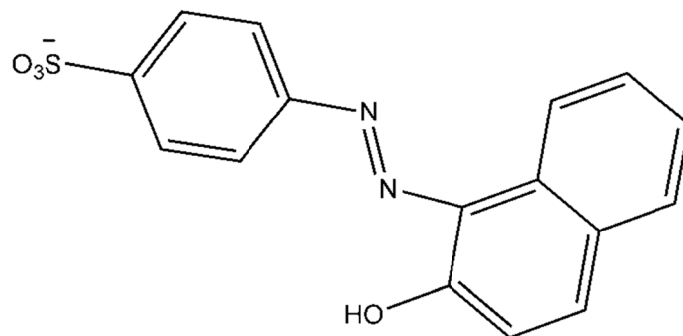

| Samples                                 | Chemical shifts of S atoms / ppm |
|-----------------------------------------|----------------------------------|
|                                         | S*                               |
| B-N-O-H nanofoams                       | -                                |
| AO7                                     | -7.9                             |
| 0V**                                    | -9.5                             |
| 1.2V**                                  | -10.4                            |
| $\Delta\delta$ (0 V- B-N-O-H nanofoams) | -                                |
| $\Delta\delta$ (0 V- AO7)               | -1.6                             |
| $\Delta\delta$ (1.2V- 0 V)              | -0.9                             |

*Note:* \* indicates the atom from the dye ions; \*\* means the B-N-O-H nanofoams charged at those voltages in the  $600\text{mgL}^{-1}$  dyes

**Table S13** Comparison of Solid state  $^{17}\text{O}$  NMR shifts for B-N-O-H nanofoams, AO7, B-N-O-H nanofoams after being charged in  $600\text{mgL}^{-1}$  AO7 at 0 V and 1.2 V, respectively.

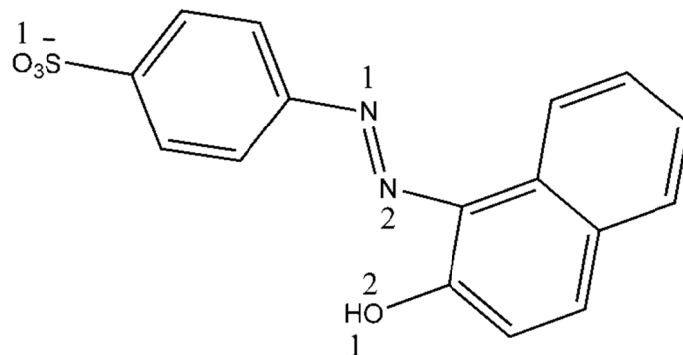

| Samples                                 | Chemical shifts of O atoms / ppm |                   |       |                 |       |       |      |       |      |
|-----------------------------------------|----------------------------------|-------------------|-------|-----------------|-------|-------|------|-------|------|
|                                         | OB <sub>1/3</sub>                | OB <sub>1/4</sub> | O*-1  | ON <sub>2</sub> | ON*-1 | ON*-2 | O*-2 | OH*-1 | OH   |
| B-N-O-H nanofoams                       | 145.0                            | 123.0             | -     | 112.0           | -     | -     | -    | -     | 50.0 |
| AO7                                     | -                                | -                 | 132.1 |                 | -     | -     | 69.8 | -     | -    |
| 0V**                                    | 143.8                            | 121.8             | 130.8 | 110.8           | 83.3  | 75.8  | 68.3 | 65.6  | 48.8 |
| 1.2V**                                  | 143                              | 120.8             | 129.7 | 109.8           | 82.1  | 74.5  | 67.3 | 64.7  | 47.9 |
| $\Delta\delta$ (0 V- B-N-O-H nanofoams) | -1.2                             | -1.2              | -     | -1.2            | -     | -     | -    | -     | -1.2 |
| $\Delta\delta$ (0 V- AO7)               | -                                | -                 | -1.3  | -               | -     | -     | -1.5 | -     | -    |
| $\Delta\delta$ (1.2V- 0 V)              | -0.8                             | -1.0              | -0.9  | -1.0            | -0.8  | -1.4  | -1.0 | -0.9  | -0.9 |

*Note:* \* indicates the atoms from the dye ions; the number behind them corresponding to their location in the dye ions;

\*\* means the B-N-O-H nanofoams charged at those voltages in the  $600\text{mgL}^{-1}$  dyes.

**Table S14** Comparison of Solid state  $^{15}\text{N}$  NMR shifts for B-N-O-H nanofoams, AO7, B-N-O-H nanofoams after being charged in  $600\text{mgL}^{-1}$  AO7 at 0 V and 1.2 V, respectively.

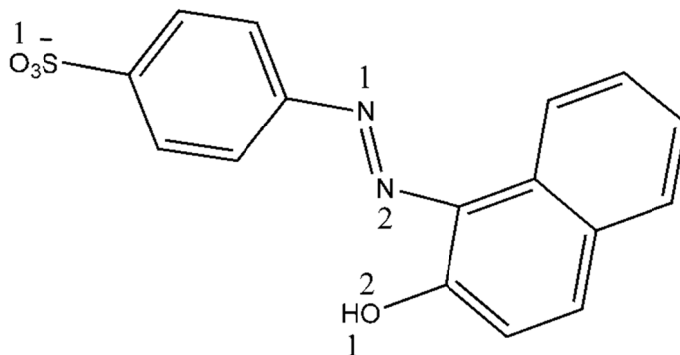

| Samples                                 | Chemical shifts of N atoms / ppm |                   |                 |                 |       |       |       |        |        |
|-----------------------------------------|----------------------------------|-------------------|-----------------|-----------------|-------|-------|-------|--------|--------|
|                                         | NB <sub>1/3</sub>                | NB <sub>1/4</sub> | NO <sub>2</sub> | NH <sub>2</sub> | NH*-1 | NO*-1 | NO*-2 | N*-1   | N*-2   |
| B-N-O-H nanofoams                       | 133.0                            | 92.0              | 56.0            | -30.0           | -     | -     | -     | -      | -      |
| AO7                                     |                                  | -                 | -               | -               | -     | -     | -     | -227.0 | -229.0 |
| 0V**                                    | 131.5                            | 90.5              | 54.5            | -31.5           | -28.9 | 13.0  | 2.5   | -217.0 | -239.0 |
| 1.2V**                                  | 130.6                            | 89.6              | 53.7            | -32.5           | -27.9 | 11.8  | 1.1   | -221.0 | -245.0 |
| $\Delta\delta$ (0 V- B-N-O-H nanofoams) | -1.5                             | -1.5              | -1.5            | -1.5            | -     | -     | -     | -      | -      |
| $\Delta\delta$ (0 V- AO7)               | -                                | -                 | -               | -               |       | -     | -     | -10.0  | -10.0  |
| $\Delta\delta$ (1.2V- 0 V)              | -0.9                             | -0.9              | -0.8            | -1.0            | -1.0  | -1.2  | -1.4  | -6.0   | -6.0   |

*Note:* \* indicates the atoms from the dye ions; the number behind them corresponding to their location in the dye ions;

\*\* means the B-N-O-H nanofoams charged at those voltages in the  $600\text{mgL}^{-1}$  dyes.



**Table S15** Comparison of Solid state  $^{13}\text{C}$  NMR shifts for B-N-O-H nanofoams, AO7, B-N-O-H nanofoams after being charged in  $600\text{mgL}^{-1}$  AO7 at 0 V and 1.2 V, respectively.

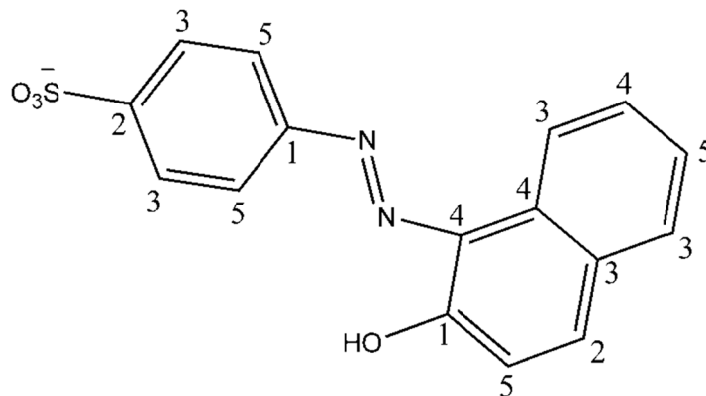

| Samples                                 | Chemical shifts of C atoms / ppm |       |       |       |       |
|-----------------------------------------|----------------------------------|-------|-------|-------|-------|
|                                         | C*-1                             | C*-2  | C*-3  | C*-4  | C*-5  |
| B-N-O-H nanofoams                       | -                                | -     | -     | -     | -     |
| AO7                                     | 157.2                            | 146.5 | 128.7 | 126.5 | 123.5 |
| 0V**                                    | 156.2                            | 145.6 | 127.8 | 125.5 | 122.5 |
| 1.2V**                                  | 155.4                            | 145.0 | 127.2 | 124.8 | 121.9 |
| $\Delta\delta$ (0 V- B-N-O-H nanofoams) | -                                | -     | -     | -     | -     |
| $\Delta\delta$ (0 V- AO7)               | -1.0                             | -0.9  | -0.9  | -1.0  | -1.0  |
| $\Delta\delta$ (1.2V- 0 V)              | -0.6                             | -0.6  | -0.6  | -0.7  | -0.6  |

*Note:* \* indicates the atoms from the dye ions; the number behind them corresponding to their location in the dye ions;

\*\* means the B-N-O-H nanofoams charged at those voltages in the  $600\text{mgL}^{-1}$  dyes.

**Table S16** Comparison of Solid state  $^{11}\text{B}$  NMR shifts for B-N-O-H nanofoams, AO7, B-N-O-H nanofoams after being charged in  $600\text{mgL}^{-1}$  AO7 at 0 V and 1.2 V, respectively.



| Samples                                 | Chemical shifts of B atoms / ppm |                 |                 |                 |                 |                 |                 |
|-----------------------------------------|----------------------------------|-----------------|-----------------|-----------------|-----------------|-----------------|-----------------|
|                                         | BN <sub>3</sub>                  | BN <sub>3</sub> | BO <sub>3</sub> | BO <sub>3</sub> | BO <sub>4</sub> | BN <sub>4</sub> | BH <sub>2</sub> |
| B-N-O-H nanofoams                       | 19.2                             | 16.0            | 15.7            | 12.5            | 6.0             | 1.7             | -4.0            |
| AO7                                     | -                                | -               | -               | -               | -               | -               | -               |
| 0V**                                    | 18.7                             | 15.5            | 15.2            | 12.0            | 5.5             | 1.2             | -4.5            |
| 1.2V**                                  | 18.4                             | 15.1            | 14.8            | 11.5            | 5.1             | 0.7             | -4.9            |
| $\Delta\delta$ (0 V- B-N-O-H nanofoams) | -0.5                             | -0.5            | -0.5            | -0.5            | -0.5            | -0.5            | -0.5            |
| $\Delta\delta$ (0 V- AO7)               | -                                | -               | -               | -               | -               | -               | -               |
| $\Delta\delta$ (1.2V- 0 V)              | -0.3                             | -0.4            | -0.4            | -0.5            | -0.4            | -0.5            | -0.4            |

*Note:* \* indicates the atoms from the dye ions; the number behind them corresponding to their location in the dye ions;

\*\* means the B-N-O-H nanofoams charged at those voltages in the  $600\text{mgL}^{-1}$  dyes.

**Table S17** Comparison of Solid state  $^1\text{H}$  NMR shifts for B-N-O-H nanofoams, AO7, B-N-O-H nanofoams after being charged in  $600\text{mgL}^{-1}$  AO7 at 0 V and 1.2 V, respectively.

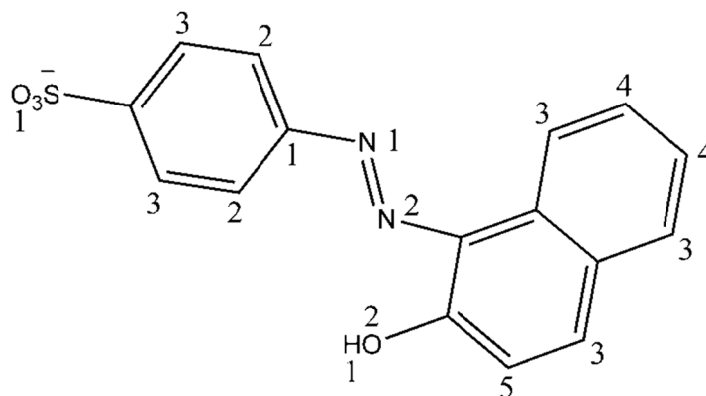

| Samples                                 | Chemical shifts of H atoms / ppm |                   |       |       |                   |       |       |       |       |       |       |       |
|-----------------------------------------|----------------------------------|-------------------|-------|-------|-------------------|-------|-------|-------|-------|-------|-------|-------|
|                                         | HO                               | HN <sub>1/2</sub> | HN*-1 | HN*-2 | HB <sub>1/2</sub> | H*-1  | H*-2  | H*-3  | H*-4  | H*-5  | HO*-1 | HO*-2 |
| B-N-O-H nanofoams                       | 15.69                            | 15.42             | -     | -     | 15.00             | -     | -     | -     | -     | -     | -     | -     |
| AO7                                     | -                                | -                 | -     | -     | -                 | 5.27  | 8.41  | 7.95  | 7.35  | 7.00  | -     | -     |
| 0V**                                    | 15.63                            | 15.37             | 15.23 | 15.19 | 14.93             | 5.20  | 8.34  | 7.88  | 7.27  | 6.92  | 6.14  | 3.58  |
| 1.2V**                                  | 15.59                            | 15.32             | 15.19 | 15.14 | 14.89             | 5.14  | 8.29  | 7.84  | 7.21  | 6.87  | 6.08  | 3.51  |
| $\Delta\delta$ (0 V- B-N-O-H nanofoams) | -0.06                            | -0.05             | -     | -     | -0.07             | -     | -     | -     | -     | -     | -     | -     |
| $\Delta\delta$ (0 V- AO7)               | -                                | -                 | -     | -     | -                 | -0.07 | -0.07 | -0.07 | -0.08 | -0.08 |       |       |
| $\Delta\delta$ (1.2V- 0 V)              | -0.04                            | -0.05             | -0.04 | -0.05 | -0.04             | -0.06 | -0.05 | -0.04 | -0.06 | -0.05 | -0.06 | -0.07 |

*Note:* \* indicates the atoms from the dye ions; the number behind them corresponding to their location in the dye ions;

\*\* means the B-N-O-H nanofoams charged at those voltages in the  $600\text{mgL}^{-1}$  dyes.

**Table S18** Comparison of Solid state  $^{17}\text{O}$  NMR shifts for B-N-O-H nanofoams, RhB, B-N-O-H nanofoams after being charged in  $600\text{mgL}^{-1}$  RhB at 0 V and 1.2 V, respectively.

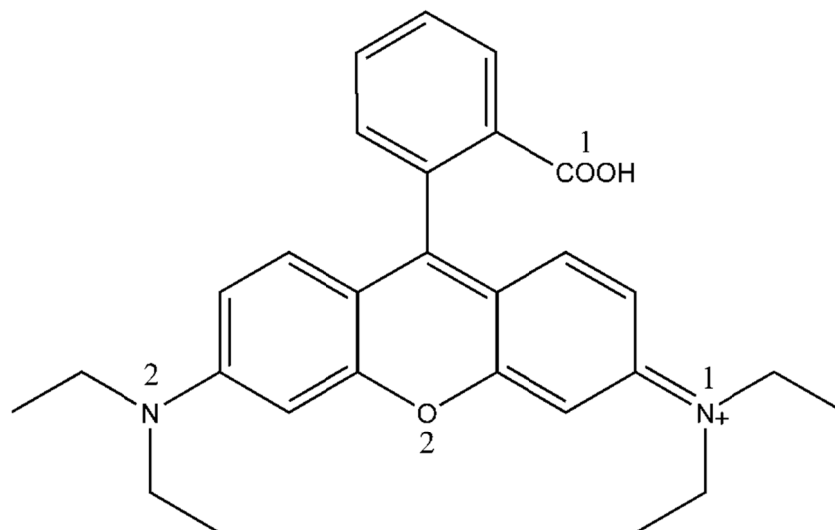

| Samples                                 | Chemical shifts of O atoms / ppm |                   |                  |                 |                   |                   |      |                  |
|-----------------------------------------|----------------------------------|-------------------|------------------|-----------------|-------------------|-------------------|------|------------------|
|                                         | OB <sub>1/3</sub>                | OB <sub>1/4</sub> | O <sup>*-1</sup> | ON <sub>2</sub> | ON <sup>*-1</sup> | ON <sup>*-2</sup> | OH   | O <sup>*-2</sup> |
| B-N-O-H nanofoams                       | 145.0                            | 123.0             | -                | 112.0           | -                 | -                 | 50.0 | -                |
| RhB                                     | -                                | -                 | 293.2            | -               | -                 | -                 | -    | 12.1             |
| 0V**                                    | 143.5                            | 121.5             | 291.0            | 110.5           | 81.0              | 75.0              | 48.5 | 10.0             |
| 1.2V**                                  | 140.0                            | 118.1             | 287.0            | 107.2           | 76.1              | 71.0              | 45.1 | 5.2              |
| $\Delta\delta$ (0 V- B-N-O-H nanofoams) | -1.5                             | -1.5              | -2.2             | -1.5            | -                 | -                 | -1.5 | -                |
| $\Delta\delta$ (0 V- RhB)               |                                  |                   |                  |                 |                   |                   |      |                  |
| $\Delta\delta$ (1.2V- 0 V)              | -3.5                             | -3.4              | -4.0             | -3.3            | -3.9              | -4.0              | -3.4 | -4.8             |

*Note:* \* indicates the atoms from the dye ions; the number behind them corresponding to their location in the dye ions;

\*\* means the B-N-O-H nanofoams charged at those voltages in the  $600\text{mgL}^{-1}$  dyes.

**Table S19** Comparison of Solid state  $^{15}\text{N}$  NMR shifts for B-N-O-H nanofoams, RhB, B-N-O-H nanofoams after being charged in  $600\text{mgL}^{-1}$  RhB at 0 V and 1.2 V, respectively.

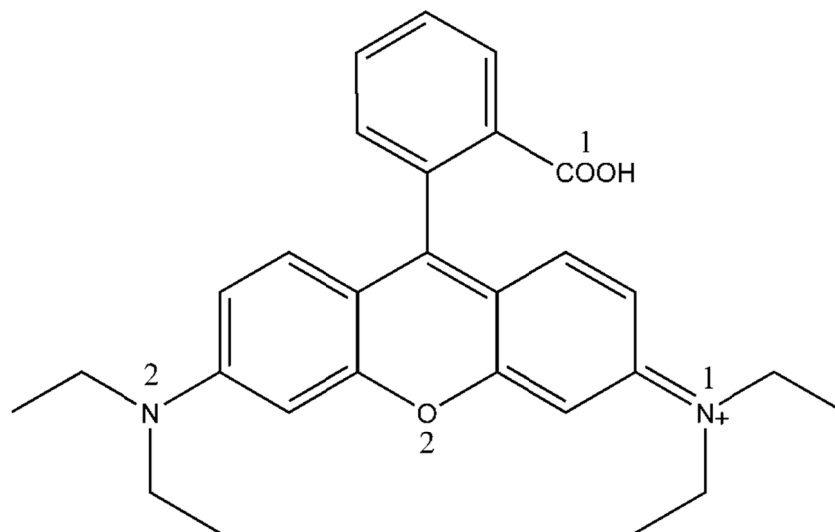

| Samples                                 | Chemical shifts of N atoms / ppm |                   |                 |                 |                   |                   |                  |                  |
|-----------------------------------------|----------------------------------|-------------------|-----------------|-----------------|-------------------|-------------------|------------------|------------------|
|                                         | NB <sub>1/3</sub>                | NB <sub>1/4</sub> | NO <sub>2</sub> | NH <sub>2</sub> | NO <sup>*-1</sup> | NO <sup>*-2</sup> | N <sup>*-1</sup> | N <sup>*-2</sup> |
| B-N-O-H nanofoams                       | 133                              | 92                | 56              | -30             | -                 | -                 | -                | -                |
| RhB                                     | -                                | -                 | -               | -               | -                 | -                 | -302             | -305             |
| 0V**                                    | 131                              | 90                | 54              | -32             | 17                | 5                 | -310             | -316             |
| 1.2V**                                  | 126                              | 86                | 50              | -28             | 11                | -1                | -326             | -336             |
| $\Delta\delta$ (0 V- B-N-O-H nanofoams) | -2                               | -2                | -2              | -2              | -                 | -                 | -                | -                |
| $\Delta\delta$ (0 V- RhB)               | -                                | -                 | -               | -               | -                 | -                 | -8               | -11              |
| $\Delta\delta$ (1.2V- 0 V)              | -5                               | -4                | -4              | -4              | -6                | -6                | -16              | -20              |

*Note:* \* indicates the atoms from the dye ions; the number behind them corresponding to their location in the dye ions;

\*\* means the B-N-O-H nanofoams charged at those voltages in the  $600\text{mgL}^{-1}$  dyes.

**Table S20** Comparison of Solid state  $^{13}\text{C}$  NMR shifts for B-N-O-H nanofoams, RhB, B-N-O-H nanofoams after being charged in  $600\text{mgL}^{-1}$  RhB at 0 V and 1.2 V, respectively.

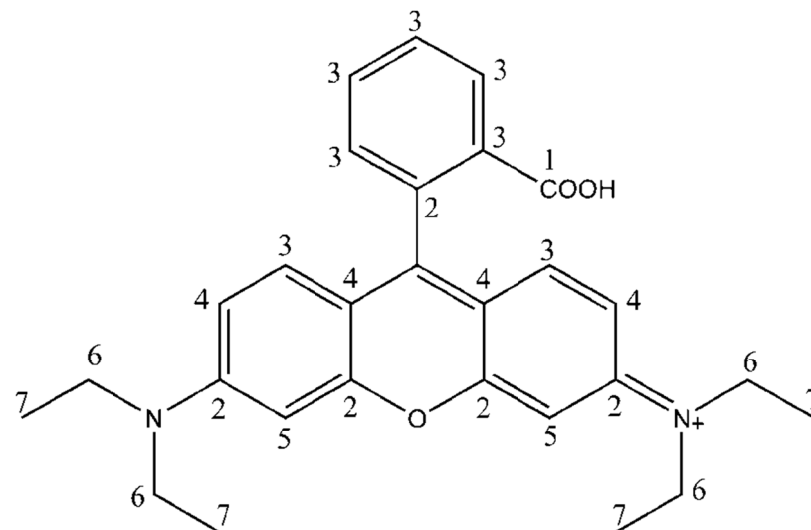

| Samples                                 | Chemical shifts of C atoms / ppm |       |       |       |      |      |      |
|-----------------------------------------|----------------------------------|-------|-------|-------|------|------|------|
|                                         | C*-1                             | C*-2  | C*-3  | C*-4  | C*-5 | C*-6 | C*-7 |
| B-N-O-H nanofoams                       | -                                | -     | -     | -     | -    | -    | -    |
| RhB                                     | 166.0                            | 155.1 | 129.2 | 110.1 | 93.0 | 44.1 | 10.2 |
| 0V**                                    | 165.0                            | 153.9 | 127.8 | 108.1 | 91.9 | 42.8 | 9.1  |
| 1.2V**                                  | 161.9                            | 151.1 | 124.6 | 105.6 | 88.9 | 40.0 | 6.7  |
| $\Delta\delta$ (0 V- B-N-O-H nanofoams) | -                                | -     | -     | -     | -    | -    | -    |
| $\Delta\delta$ (0 V- RhB)               | -1.0                             | -1.2  | -1.4  | -2.0  | -1.1 | -1.3 | -1.1 |
| $\Delta\delta$ (1.2V- 0 V)              | -3.1                             | -2.8  | -3.2  | -2.5  | -3.0 | -2.8 | -2.3 |

*Note:* \* indicates the atoms from the dye ions; the number behind them corresponding to their location in the dye ions;

\*\* means the B-N-O-H nanofoams charged at those voltages in the  $600\text{mgL}^{-1}$  dyes.

**Table S21** Comparison of Solid state  $^{11}\text{B}$  NMR shifts for B-N-O-H nanofoams, RhB, B-N-O-H nanofoams after being charged in  $600\text{mgL}^{-1}$  RhB at 0 V and 1.2 V, respectively.

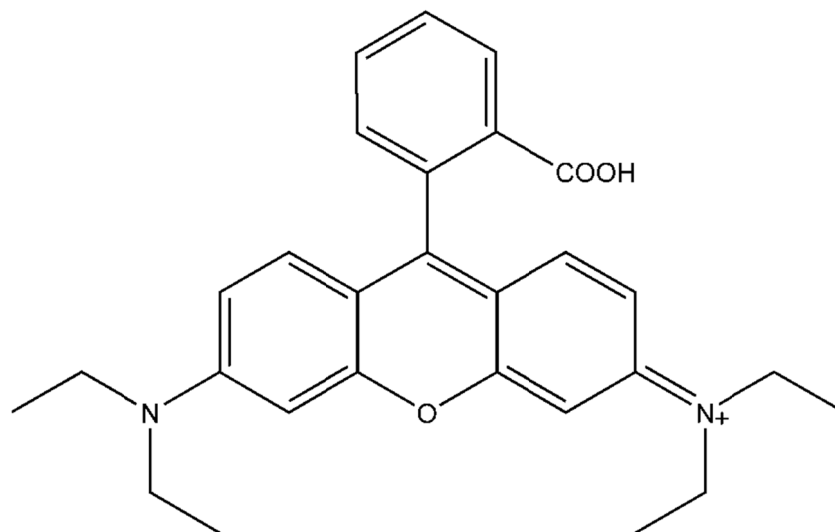

| Samples                                 | Chemical shifts of B atoms / ppm |                 |                 |                 |                 |                 |                 |
|-----------------------------------------|----------------------------------|-----------------|-----------------|-----------------|-----------------|-----------------|-----------------|
|                                         | BN <sub>3</sub>                  | BN <sub>3</sub> | BO <sub>3</sub> | BO <sub>3</sub> | BO <sub>4</sub> | BN <sub>4</sub> | BH <sub>2</sub> |
| B-N-O-H nanofoams                       | 19.2                             | 16.0            | 15.7            | 12.5            | 6.0             | 1.7             | -4.0            |
| RhB                                     | -                                | -               | -               | -               | -               | -               | -               |
| 0V**                                    | 18.6                             | 15.4            | 15.1            | 11.9            | 5.4             | 1.1             | -4.6            |
| 1.2V**                                  | 16.5                             | 13.4            | 13.0            | 9.9             | 3.2             | -0.8            | -6.6            |
| $\Delta\delta$ (0 V- B-N-O-H nanofoams) | -0.6                             | -0.6            | -0.6            | -0.6            | -0.6            | -0.6            | -0.6            |
| $\Delta\delta$ (0 V- RhB)               | -                                | -               | -               | -               | -               | -               | -               |
| $\Delta\delta$ (1.2V- 0 V)              | -2.1                             | -2.0            | -2.1            | -2.0            | -2.2            | -1.9            | -2.0            |

*Note:* \* indicates the atoms from the dye ions; the number behind them corresponding to their location in the dye ions;

\*\* means the B-N-O-H nanofoams charged at those voltages in the  $600\text{mgL}^{-1}$  dyes.

**Table S22** Comparison of Solid state  $^1\text{H}$  NMR shifts for B-N-O-H nanofoams, RhB, B-N-O-H nanofoams after being charged in  $600\text{mgL}^{-1}$  RhB at 0 V and 1.2 V, respectively.

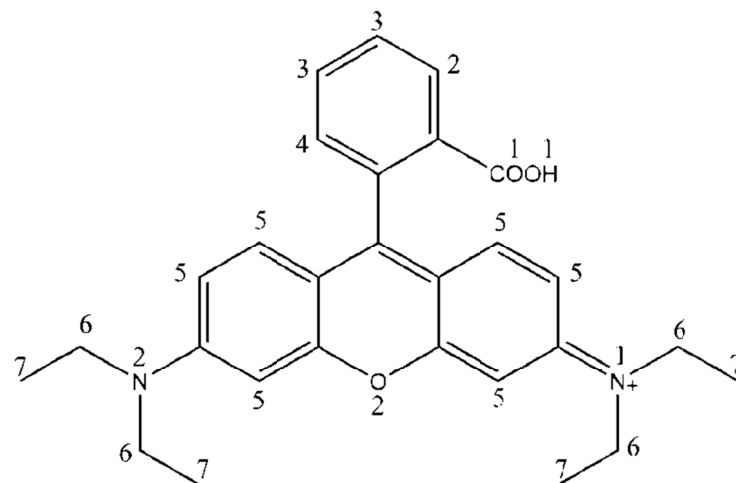

| Samples                                 | Chemical shifts of H atoms / ppm |                   |       |       |                   |       |       |       |       |       |       |       |       |       |  |
|-----------------------------------------|----------------------------------|-------------------|-------|-------|-------------------|-------|-------|-------|-------|-------|-------|-------|-------|-------|--|
|                                         | HO                               | HN <sub>1/2</sub> | HN*-1 | HN*-2 | HB <sub>1/2</sub> | HO*-1 | HO*-2 | H*-1  | H*-2  | H*-3  | H*-4  | H*-5  | H*-6  | H*-7  |  |
| B-N-O-H nanofoams                       | 15.69                            | 15.42             | -     | -     | 15.00             | -     | -     | -     | -     | -     | -     | -     | -     | -     |  |
| RhB                                     | -                                | -                 | -     | -     | -                 | -     | -     | 10.93 | 8.11  | 7.80  | 7.30  | 6.80  | 3.50  | 1.20  |  |
| 0V**                                    | 15.60                            | 15.33             | 15.15 | 15.09 | 14.10             | 10.02 | 9.91  | 10.88 | 8.07  | 7.75  | 7.27  | 6.76  | 3.45  | 1.16  |  |
| 1.2V**                                  | 15.34                            | 15.06             | 14.90 | 14.83 | 13.85             | 9.69  | 9.59  | 10.72 | 7.93  | 7.63  | 7.14  | 6.63  | 3.3   | 1.02  |  |
| $\Delta\delta$ (0 V- B-N-O-H nanofoams) | -0.09                            | -0.09             | -     | -     | -0.09             | -     | -     | -     | -     | -     | -     | -     | -     | -     |  |
| $\Delta\delta$ (0 V- RhB)               | -                                | -                 | -     | -     | -                 | -     | -     | -0.05 | -0.04 | -0.05 | -0.03 | -0.04 | -0.05 | -0.04 |  |
| $\Delta\delta$ (1.2V- 0 V)              | -0.26                            | -0.27             | -0.25 | -0.26 | -0.25             | -0.33 | -0.32 | -0.16 | -0.14 | -0.12 | -0.13 | -0.13 | -0.15 | -0.14 |  |

*Note:* \* indicates the atoms from the dye ions; the number behind them corresponding to their location in the dye ions;

\*\* means the B-N-O-H nanofoams charged at those voltages in the  $600\text{mgL}^{-1}$  dyes.



**Table S23** Comparison of Solid state  $^{33}\text{S}$  NMR shifts for B-N-O-H nanofoams, Congo red, B-N-O-H nanofoams after being charged in  $600\text{mgL}^{-1}$  Congo red at 0 V and 1.2 V, respectively.

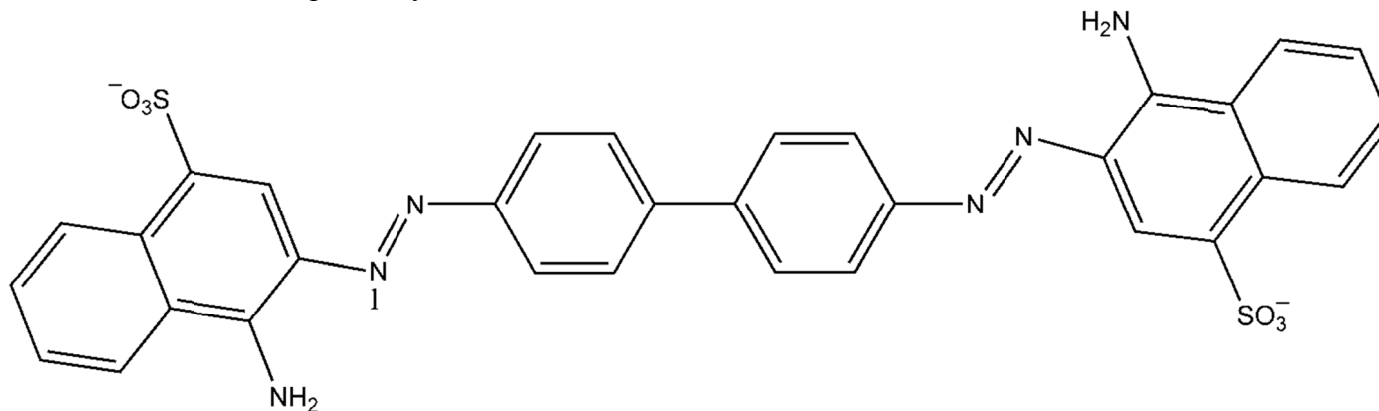

| Samples                                 | Chemical shifts of S atoms<br>/ ppm |
|-----------------------------------------|-------------------------------------|
|                                         | S*                                  |
| B-N-O-H nanofoams                       | -                                   |
| Congo red                               | -10.0                               |
| 0V**                                    | -11.0                               |
| 1.2V**                                  | -11.6                               |
| $\Delta\delta$ (0 V- B-N-O-H nanofoams) | -                                   |
| $\Delta\delta$ (0 V- Congo red)         | -1.0                                |
| $\Delta\delta$ (1.2V- 0 V)              | -0.6                                |

*Note:* \* indicates the atoms from the dye ions; the number behind them corresponding to their location in the dye ions;

\*\* means the B-N-O-H nanofoams charged at those voltages in the  $600\text{mgL}^{-1}$  dyes.

**Table S24** Comparison of Solid state  $^{17}\text{O}$  NMR shifts for B-N-O-H nanofoams, Congo red, B-N-O-H nanofoams after being charged in  $600\text{mgL}^{-1}$  Congo red at 0 V and 1.2 V, respectively.

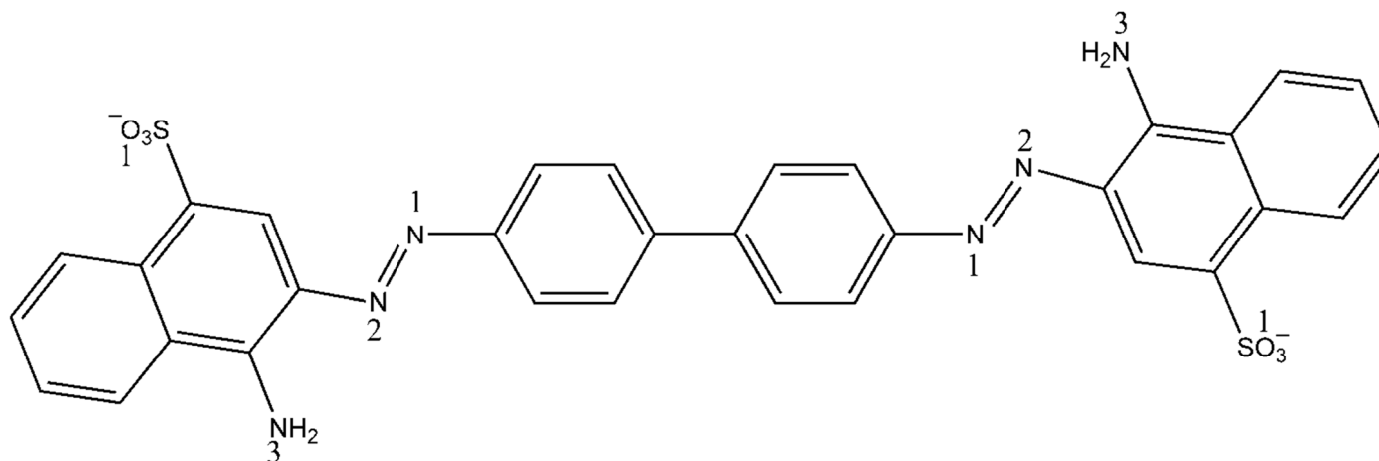

| Samples                                 | Chemical shifts of O atoms / ppm |                   |       |                 |       |       |       |       |      |
|-----------------------------------------|----------------------------------|-------------------|-------|-----------------|-------|-------|-------|-------|------|
|                                         | OB <sub>1/3</sub>                | OB <sub>1/4</sub> | O*    | ON <sub>2</sub> | ON*-1 | ON*-2 | ON*-3 | OH*-1 | OH   |
| B-N-O-H nanofoams                       | 145.0                            | 123.0             | -     | 112.0           | -     | -     | -     | -     | 50.0 |
| Congo red                               | -                                | -                 | 133.0 | -               |       |       |       | -     |      |
| 0V**                                    | 144.0                            | 122.0             | 135.1 | 111.0           | 90.1  | 87.0  | 63.2  | 55.0  | 49.0 |
| 1.2V**                                  | 143.5                            | 121.3             | 134.1 | 110.4           | 89.2  | 86.1  | 62.3  | 54.2  | 48.4 |
| $\Delta\delta$ (0 V- B-N-O-H nanofoams) | -1.0                             | -1.0              | -     | -1.0            | -     | -     | -     | -     | -1.0 |
| $\Delta\delta$ (0 V- Congo red)         | -                                | -                 | -1.9  | -               | -     | -     | -     | -     | -    |
| $\Delta\delta$ (1.2V- 0 V)              | -0.5                             | -0.7              | -1.0  | -0.6            | -0.9  | -0.9  | -0.9  | -0.8  | -0.6 |

*Note:* \* indicates the atoms from the dye ions; the number behind them corresponding to their location in the dye ions;

\*\* means the B-N-O-H nanofoams charged at those voltages in the  $600\text{mgL}^{-1}$  dyes.

**Table S25** Comparison of Solid state  $^{15}\text{N}$  NMR shifts for B-N-O-H nanofoams, Congo red, B-N-O-H nanofoams after being charged in  $600\text{mgL}^{-1}$  Congo red at 0 V and 1.2 V, respectively.



| Samples                                 | Chemical shifts of N atoms / ppm |                   |                 |                 |       |       |       |        |        |
|-----------------------------------------|----------------------------------|-------------------|-----------------|-----------------|-------|-------|-------|--------|--------|
|                                         | NB <sub>1/3</sub>                | NB <sub>1/4</sub> | NO <sub>2</sub> | NH <sub>2</sub> | NO*-1 | NH*   | N*-1  | N*-2   | N*-3   |
| B-N-O-H nanofoams                       | 133                              | 92.0              | 56.0            | -30.0           | -     | -     | -     | -      | -      |
| Congo red                               | -                                | -                 | -               | -               | -     | -     | -10.6 | -203.7 | -217.5 |
| 0V**                                    | 132.1                            | 91.0              | 55.2            | -31.0           | 3.5   | -10.1 | -15.1 | -207.5 | -222.4 |
| 1.2V**                                  | 131.5                            | 90.4              | 54.5            | -31.4           | 2.5   | -9.1  | -18.0 | -211.1 | -226.0 |
| $\Delta\delta$ (0 V- B-N-O-H nanofoams) | -0.9                             | -1.0              | -0.8            | -1.0            | -     | -     | -     | -      | -      |
| $\Delta\delta$ (0 V- Congo red)         | -                                | -                 | -               | -               | -     | -     | -4.5  | -4.8   | -4.9   |
| $\Delta\delta$ (1.2V- 0 V)              | -0.6                             | -0.6              | -0.7            | -0.6            | -1.0  | -1.0  | -2.9  | -3.6   | -3.6   |

*Note:* \* indicates the atoms from the dye ions; the number behind them corresponding to their location in the dye ions;

\*\* means the B-N-O-H nanofoams charged at those voltages in the  $600\text{mgL}^{-1}$  dyes.

**Table S26** Comparison of Solid state  $^{13}\text{C}$  NMR shifts for B-N-O-H nanofoams, Congo red, B-N-O-H nanofoams after being charged in  $600\text{mgL}^{-1}$  Congo red at 0 V and 1.2 V, respectively.

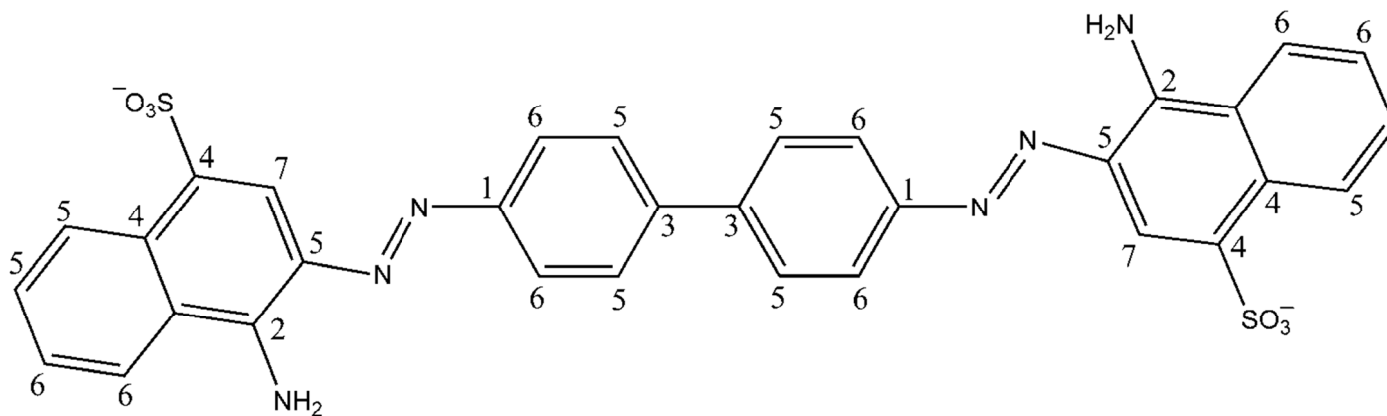

| Samples                                 | Chemical shifts of C atoms / ppm |       |       |       |       |       |       |
|-----------------------------------------|----------------------------------|-------|-------|-------|-------|-------|-------|
|                                         | C*-1                             | C*-2  | C*-3  | C*-4  | C*-5  | C*-6  | C*-7  |
| B-N-O-H nanofoams                       | -                                | -     | -     | -     | -     | -     | -     |
| Congo red                               | 151.0                            | 145.3 | 138.8 | 132.2 | 128.0 | 123.8 | 116.0 |
| 0V**                                    | 150.4                            | 144.8 | 138.3 | 131.4 | 127.5 | 123.2 | 115.3 |
| 1.2V**                                  | 150.0                            | 144.3 | 137.7 | 130.8 | 127.0 | 122.7 | 114.9 |
| $\Delta\delta$ (0 V- B-N-O-H nanofoams) | -                                | -     | -     | -     | -     | -     | -     |
| $\Delta\delta$ (0 V- Congo red)         | -0.6                             | -0.5  | -0.5  | -0.8  | -0.5  | -0.4  | -0.7  |
| $\Delta\delta$ (1.2V- 0 V)              | -0.4                             | -0.5  | -0.6  | -0.4  | -0.5  | -0.5  | -0.4  |

*Note:* \* indicates the atoms from the dye ions; the number behind them corresponding to their location in the dye ions;

\*\* means the B-N-O-H nanofoams charged at those voltages in the  $600\text{mgL}^{-1}$  dyes.

**Table S27** Comparison of Solid state  $^{11}\text{B}$  NMR shifts for B-N-O-H nanofoams, Congo red, B-N-O-H nanofoams after being charged in  $600\text{mgL}^{-1}$  Congo red at 0 V and 1.2 V, respectively.

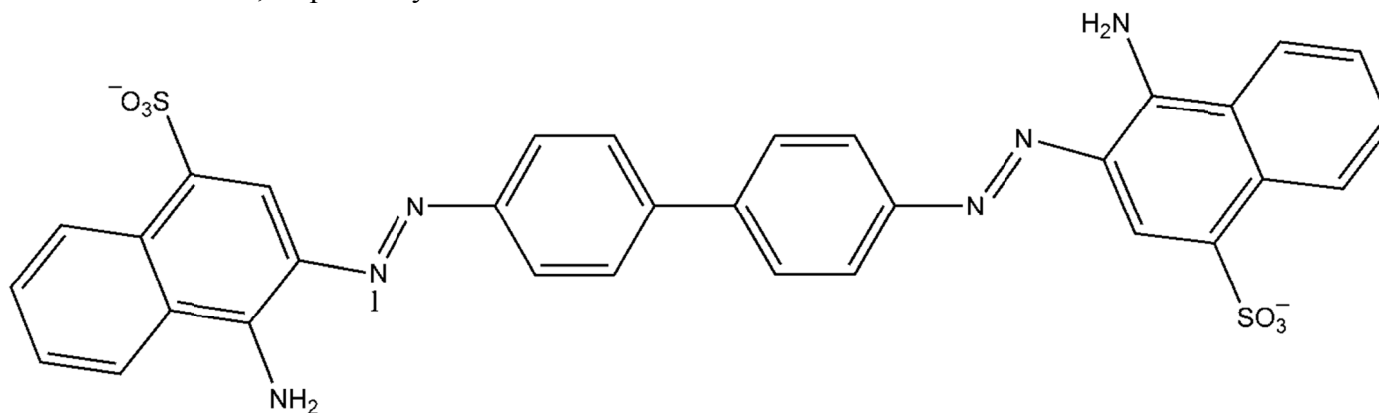

| Samples                                 | Chemical shifts of B atoms / ppm |                 |                 |                 |                 |                 |                 |
|-----------------------------------------|----------------------------------|-----------------|-----------------|-----------------|-----------------|-----------------|-----------------|
|                                         | BN <sub>3</sub>                  | BN <sub>3</sub> | BO <sub>3</sub> | BO <sub>3</sub> | BO <sub>4</sub> | BN <sub>4</sub> | BH <sub>2</sub> |
| B-N-O-H nanofoams                       | 19.2                             | 16.0            | 15.7            | 12.5            | 6.0             | 1.7             | -4.0            |
| Congo red                               | -                                | -               | -               | -               |                 | -               | -               |
| 0V**                                    | 18.8                             | 15.6            | 15.3            | 12.1            | 5.6             | 1.3             | -4.4            |
| 1.2V**                                  | 18.6                             | 15.4            | 15.1            | 11.9            | 5.4             | 1.1             | -4.6            |
| $\Delta\delta$ (0 V- B-N-O-H nanofoams) | -0.4                             | -0.4            | -0.4            | -0.4            | -0.4            | -0.4            | -0.4            |
| $\Delta\delta$ (0 V- Congo red)         | -                                | -               | -               | -               |                 | -               | -               |
| $\Delta\delta$ (1.2V- 0 V)              | -0.2                             | -0.3            | -0.2            | -0.2            | -0.3            | -0.3            | -0.2            |

*Note:* \* indicates the atoms from the dye ions; the number behind them corresponding to their location in the dye ions;

\*\* means the B-N-O-H nanofoams charged at those voltages in the  $600\text{mgL}^{-1}$  dyes.

**Table S28** Comparison of Solid state  $^1\text{H}$  NMR shifts for B-N-O-H nanofoams, Congo red, B-N-O-H nanofoams after being charged in  $600\text{mgL}^{-1}$  Congo red at 0 V and 1.2 V, respectively.

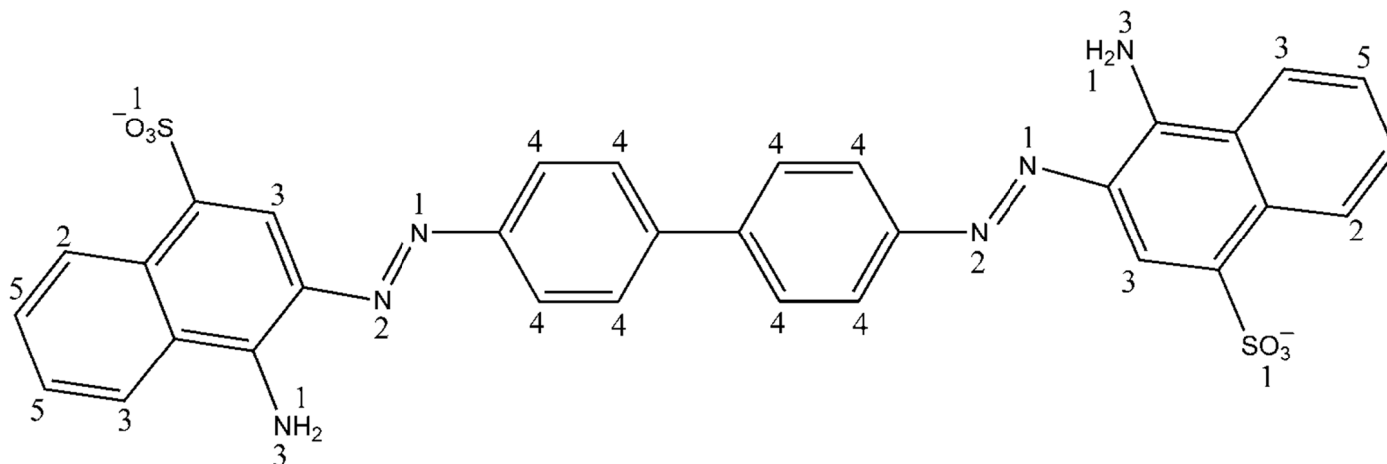

| Samples                                 | Chemical shifts of H atoms / ppm |                   |       |       |       |                   |       |       |       |       |       |       |
|-----------------------------------------|----------------------------------|-------------------|-------|-------|-------|-------------------|-------|-------|-------|-------|-------|-------|
|                                         | HO                               | HN <sub>1/2</sub> | HN*-1 | HN*-2 | HN*-3 | HB <sub>1/2</sub> | H*-1  | H*-2  | H*-3  | H*-4  | H*-5  | HO*-1 |
| B-N-O-H nanofoams                       | 15.69                            | 15.42             | -     | -     | -     | 15.00             | -     | -     | -     | -     | -     | -     |
| Congo red                               | -                                | -                 | -     | -     | -     | -                 | 6.10  | 8.67  | 8.20  | 7.88  | 7.42  | -     |
| 0V**                                    | 15.65                            | 15.38             | 15.18 | 15.10 | 5.80  | 14.96             | 6.00  | 8.63  | 8.16  | 7.84  | 7.38  | 3.60  |
| 1.2V**                                  | 15.62                            | 15.34             | 15.15 | 15.07 | 5.77  | 14.93             | 5.95  | 8.56  | 8.12  | 7.80  | 7.35  | 3.57  |
| $\Delta\delta$ (0 V- B-N-O-H nanofoams) | -0.04                            | -0.04             | -     | -     | -     | -0.04             | -     | -     | -     | -     | -     | -     |
| $\Delta\delta$ (0 V- Congo red)         | -                                | -                 | -     | -     | -     | -                 | -0.10 | -0.04 | -0.04 | -0.04 | -0.04 | -     |
| $\Delta\delta$ (1.2V- 0 V)              | -0.03                            | -0.04             | -0.03 | -0.03 | -0.03 | -0.03             | -0.05 | -0.05 | -0.04 | -0.04 | -0.03 | -0.03 |

*Note:* \* indicates the atoms from the dye ions; the number behind them corresponding to their location in the dye ions;

\*\* means the B-N-O-H nanofoams charged at those voltages in the  $600\text{mgL}^{-1}$  dyes.

**Table S29** Comparison of Solid state  $^{33}\text{S}$  NMR shifts for B-N-O-H nanofoams, Ponceau s, B-N-O-H nanofoams after being charged in  $600\text{mgL}^{-1}$  Ponceau s at 0 V and 1.2 V, respectively.

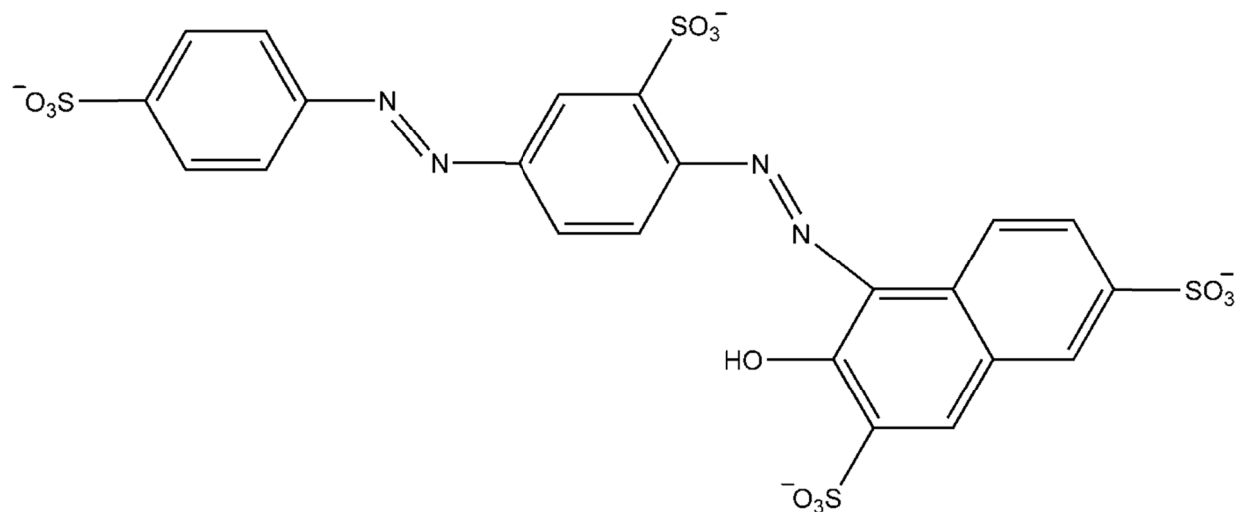

| Samples                                 | Chemical shifts of S atoms / ppm |       |       |       |
|-----------------------------------------|----------------------------------|-------|-------|-------|
|                                         | S*-1                             | S*-2  | S*-3  | S*-4  |
| B-N-O-H nanofoams                       | -                                | -     | -     | -     |
| Ponceau s                               | -7.0                             | -9.9  | -12.9 | -15.5 |
| 0V**                                    | -7.8                             | -10.9 | -13.7 | -16.5 |
| 1.2V**                                  | -8.2                             | -11.4 | -14.1 | -17.0 |
| $\Delta\delta$ (0 V- B-N-O-H nanofoams) |                                  |       |       |       |
| $\Delta\delta$ (0 V- Ponceau s)         | -0.8                             | -1.0  | -0.8  | -1.0  |
| $\Delta\delta$ (1.2V- 0 V)              | -0.4                             | -0.5  | -0.4  | -0.5  |

*Note:* \* indicates the atoms from the dye ions; the number behind them corresponding to their location in the dye ions;

\*\* means the B-N-O-H nanofoams charged at those voltages in the  $600\text{mgL}^{-1}$  dyes.

**Table S30** Comparison of Solid state  $^{17}\text{O}$  NMR shifts for B-N-O-H nanofoams, Ponceau s, B-N-O-H nanofoams after being charged in  $600\text{mgL}^{-1}$  Ponceau s at 0 V and 1.2 V, respectively.

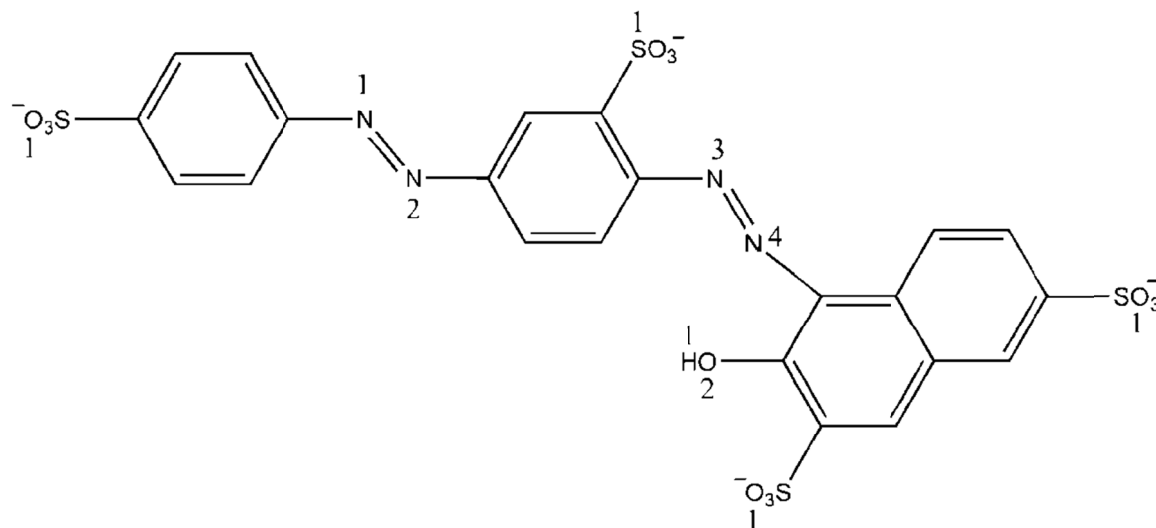

| Samples                                 | Chemical shifts of O atoms / ppm |                   |                  |                 |                   |                   |                   |                   |      |                   |                  |
|-----------------------------------------|----------------------------------|-------------------|------------------|-----------------|-------------------|-------------------|-------------------|-------------------|------|-------------------|------------------|
|                                         | OB <sub>1/3</sub>                | OB <sub>1/4</sub> | O <sup>*-1</sup> | ON <sub>2</sub> | ON <sup>*-1</sup> | ON <sup>*-2</sup> | ON <sup>*-3</sup> | ON <sup>*-4</sup> | OH   | OH <sup>*-1</sup> | O <sup>*-2</sup> |
| B-N-O-H nanofoams                       | 145.0                            | 123.0             | -                | 112.0           | -                 | -                 | -                 | -                 | 50.0 | -                 | -                |
| Ponceau s                               | -                                | -                 | 138.2            | -               | -                 | -                 | -                 | -                 | -    | -                 | 13.4             |
| 0V**                                    | 144.2                            | 122.2             | 137.0            | 111.2           | 78.0              | 74.0              | 72.0              | 69.0              | 49.2 | 50.2              | 12.0             |
| 1.2V**                                  | 143.8                            | 121.7             | 136.4            | 110.8           | 77.3              | 73.5              | 71.4              | 68.5              | 48.8 | 49.8              | 11.3             |
| $\Delta\delta$ (0 V- B-N-O-H nanofoams) | -0.8                             | -0.8              | -                | -0.8            | -                 | -                 | -                 | -                 | -0.8 | -                 | -                |
| $\Delta\delta$ (0 V- Ponceau s)         | -                                | -                 | -1.2             | -               | -                 | -                 | -                 | -                 | -    | -                 | -1.4             |
| $\Delta\delta$ (1.2V- 0 V)              | -0.4                             | -0.5              | -0.6             | -0.4            | -0.7              | -0.5              | -0.6              | -0.5              | -0.4 | -0.4              | -0.7             |

*Note:* \* indicates the atoms from the dye ions; the number behind them corresponding to their location in the dye ions;

\*\* means the B-N-O-H nanofoams charged at those voltages in the  $600\text{mgL}^{-1}$  dyes.



**Table S31** Comparison of Solid state  $^{15}\text{N}$  NMR shifts for B-N-O-H nanofoams, Ponceau s, B-N-O-H nanofoams after being charged in  $600\text{mgL}^{-1}$  Ponceau s at 0 V and 1.2 V, respectively.

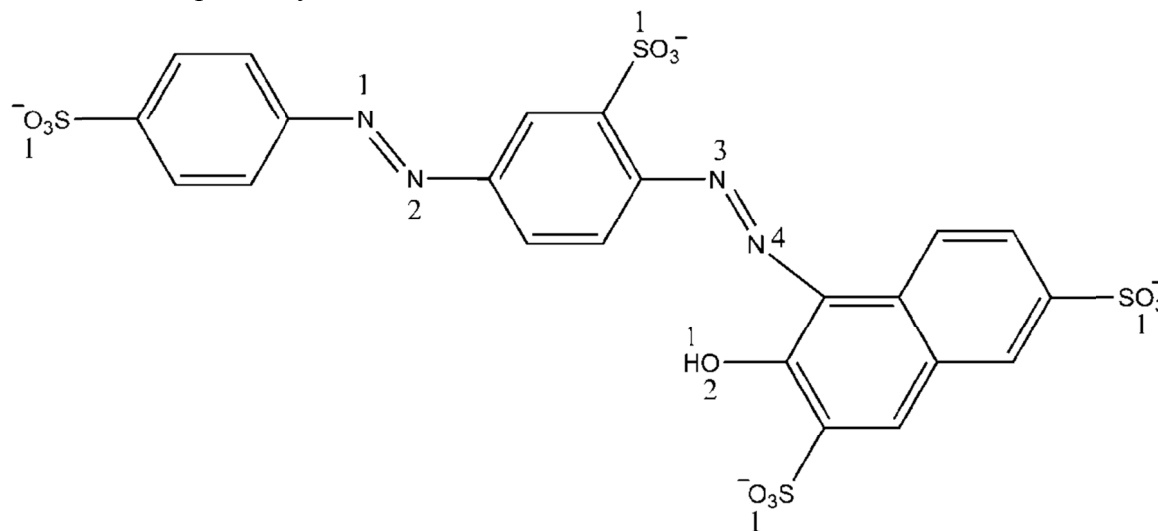

| Samples                                 | Chemical shifts of N atoms / ppm |                   |                 |                 |       |       |       |        |        |        |        |
|-----------------------------------------|----------------------------------|-------------------|-----------------|-----------------|-------|-------|-------|--------|--------|--------|--------|
|                                         | NB <sub>1/3</sub>                | NB <sub>1/4</sub> | NO <sub>2</sub> | NH <sub>2</sub> | NO*-1 | NO*-2 | NH*   | N*-1   | N*-2   | N*-3   | N*-4   |
| B-N-O-H nanofoams                       | 133.0                            | 92.0              | 56.0            | -30.0           | -     | -     | -     | -      | -      | -      | -      |
| Ponceau s                               | -                                | -                 | -               | -               | -     | -     | -     | -239.0 | -229.0 | -227.0 | -252.0 |
| 0V**                                    | 132.2                            | 91.2              | 55.2            | -30.8           | 4.3   | 1.0   | -14.0 | -245.0 | -233.0 | -235.0 | -258.0 |
| 1.2V**                                  | 131.8                            | 90.8              | 54.9            | -31.2           | 3.6   | 0.3   | -14.6 | -248.0 | -235.0 | -238.0 | -261.0 |
| $\Delta\delta$ (0 V- B-N-O-H nanofoams) | -0.8                             | -0.8              | -0.8            | -0.8            | -     | -     | -     | -      | -      | -      | -      |
| $\Delta\delta$ (0 V- Ponceau s)         | -                                | -                 | -               | -               | -     | -     | -     | -6.0   | -4.0   | -8.0   | -6.0   |
| $\Delta\delta$ (1.2V- 0 V)              | -0.4                             | -0.4              | -0.3            | -0.4            | -0.7  | -0.7  | -0.6  | -3.0   | -2.0   | -3.0   | -3.0   |

*Note:* \* indicates the atoms from the dye ions; the number behind them corresponding to their location in the dye ions;

\*\* means the B-N-O-H nanofoams charged at those voltages in the  $600\text{mgL}^{-1}$  dyes.

**Table S32** Comparison of Solid state  $^{13}\text{C}$  NMR shifts for B-N-O-H nanofoams, Ponceau s, B-N-O-H nanofoams after being charged in  $600\text{mgL}^{-1}$  Ponceau s at 0 V and 1.2 V, respectively.

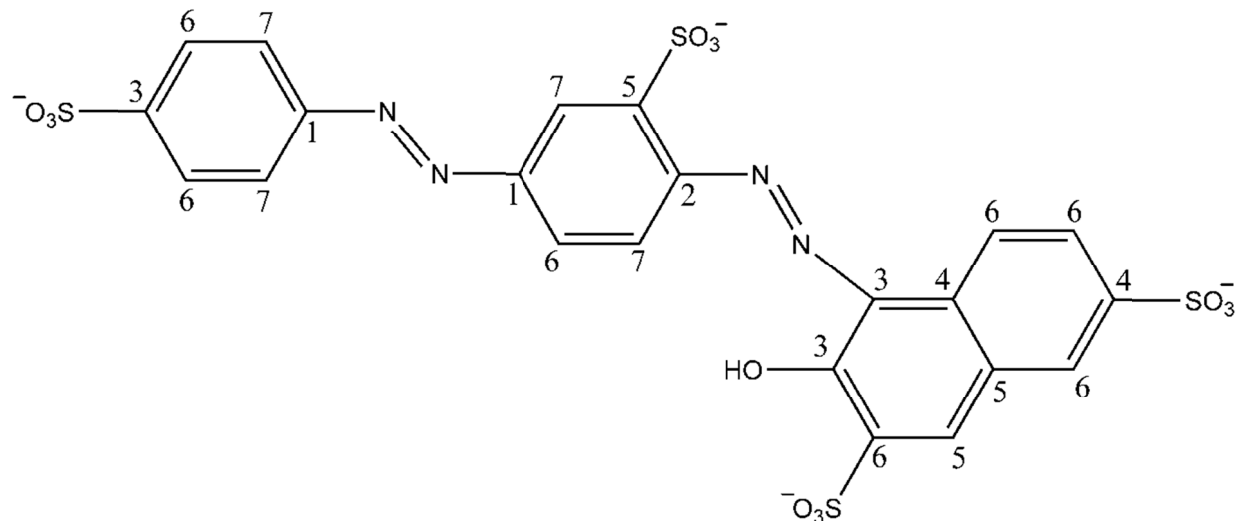

| Samples                                 | Chemical shifts of C atoms / ppm |       |       |       |       |       |       |
|-----------------------------------------|----------------------------------|-------|-------|-------|-------|-------|-------|
|                                         | C*-1                             | C*-2  | C*-3  | C*-4  | C*-5  | C*-6  | C*-7  |
| B-N-O-H nanofoams                       | -                                | -     | -     | -     | -     | -     | -     |
| Ponceau s                               | 152.1                            | 149.0 | 146.6 | 139.0 | 131.1 | 129.0 | 125.0 |
| 0V**                                    | 151.5                            | 148.4 | 146.0 | 138.4 | 130.5 | 128.4 | 124.4 |
| 1.2V**                                  | 151.2                            | 148.0 | 145.6 | 138.0 | 130.2 | 128.0 | 124.1 |
| $\Delta\delta$ (0 V- B-N-O-H nanofoams) | -                                | -     | -     | -     | -     | -     | -     |
| $\Delta\delta$ (0 V- Ponceau s)         | -0.6                             | -0.6  | -0.6  | -0.6  | -0.6  | -0.6  | -0.6  |
| $\Delta\delta$ (1.2V- 0 V)              | -0.3                             | -0.4  | -0.4  | -0.4  | -0.3  | -0.4  | -0.3  |

*Note:* \* indicates the atoms from the dye ions; the number behind them corresponding to their location in the dye ions;

\*\* means the B-N-O-H nanofoams charged at those voltages in the  $600\text{mgL}^{-1}$  dyes.

**Table S33** Comparison of Solid state  $^{11}\text{B}$  NMR shifts for B-N-O-H nanofoams, Ponceau s, B-N-O-H nanofoams after being charged in  $600\text{mgL}^{-1}$  Ponceau s at 0 V and 1.2 V, respectively.



| Samples                                 | Chemical shifts of B atoms / ppm |                 |                 |                 |                 |                 |                 |
|-----------------------------------------|----------------------------------|-----------------|-----------------|-----------------|-----------------|-----------------|-----------------|
|                                         | BN <sub>3</sub>                  | BN <sub>3</sub> | BO <sub>3</sub> | BO <sub>3</sub> | BO <sub>4</sub> | BN <sub>4</sub> | BH <sub>2</sub> |
| B-N-O-H nanofoams                       | 19.2                             | 16.0            | 15.7            | 12.5            | 6.0             | 1.7             | -4.0            |
| Ponceau s                               | -                                | -               | -               | -               |                 | -               | -               |
| 0V**                                    | 18.9                             | 15.7            | 15.4            | 12.2            | 5.7             | 1.4             | -4.3            |
| 1.2V**                                  | 18.7                             | 15.4            | 15.1            | 12.0            | 5.4             | 1.2             | -4.5            |
| $\Delta\delta$ (0 V- B-N-O-H nanofoams) | -0.3                             | -0.3            | -0.3            | -0.3            | -0.3            | -0.3            | -0.3            |
| $\Delta\delta$ (0 V- Ponceau s)         | -                                | -               | -               | -               |                 | -               | -               |
| $\Delta\delta$ (1.2V- 0 V)              | -0.2                             | -0.3            | -0.3            | -0.2            | -0.3            | -0.2            | -0.2            |

*Note:* \* indicates the atoms from the dye ions; the number behind them corresponding to their location in the dye ions;

\*\* means the B-N-O-H nanofoams charged at those voltages in the  $600\text{mgL}^{-1}$  dyes.

**Table S34** Comparison of Solid state  $^1\text{H}$  NMR shifts for B-N-O-H nanofoams, Ponceau s, B-N-O-H nanofoams after being charged in  $600\text{mgL}^{-1}$  Ponceau s at 0 V and 1.2 V, respectively.

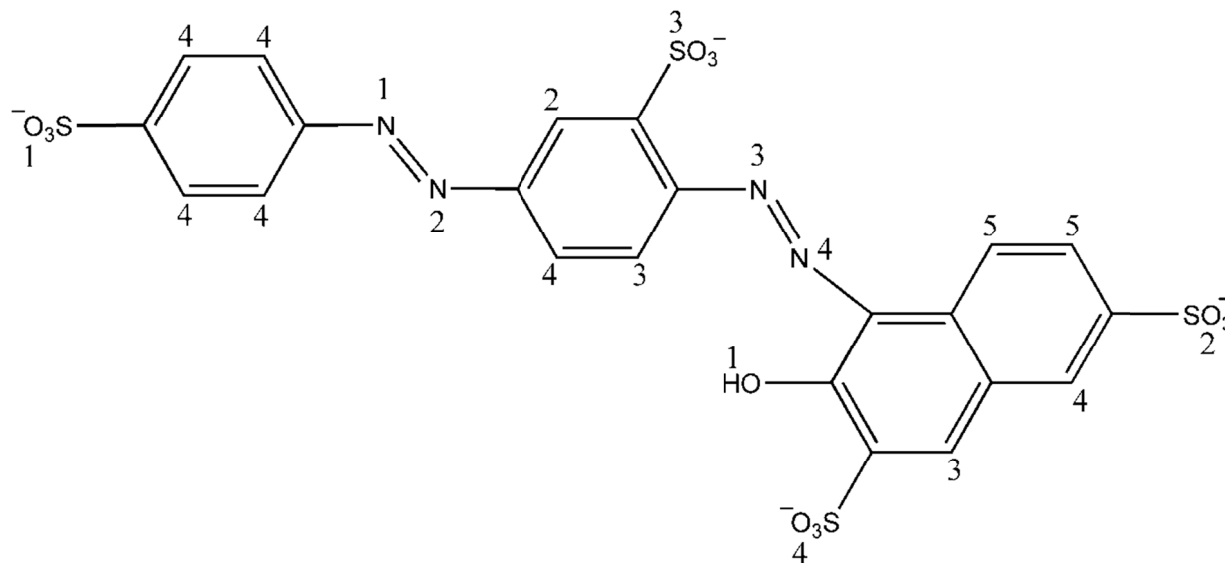

| Samples           | Chemical shifts of H atoms / ppm |                   |                  |                  |                  |                  |                   |                 |                 |                 |                 |                 |                  |                  |                  |                  |   |
|-------------------|----------------------------------|-------------------|------------------|------------------|------------------|------------------|-------------------|-----------------|-----------------|-----------------|-----------------|-----------------|------------------|------------------|------------------|------------------|---|
|                   | HO                               | HN <sub>1/2</sub> | HN* <sub>1</sub> | HN* <sub>2</sub> | HN* <sub>3</sub> | HN* <sub>4</sub> | HB <sub>1/2</sub> | H* <sub>1</sub> | H* <sub>2</sub> | H* <sub>3</sub> | H* <sub>4</sub> | H* <sub>5</sub> | HO* <sub>1</sub> | HO* <sub>2</sub> | HO* <sub>3</sub> | HO* <sub>4</sub> |   |
| B-N-O-H nanofoams | 15.69                            | 15.42             | -                | -                | -                |                  | 15.00             | -               | -               | -               | -               | -               | -                | -                | -                | -                | - |
| Ponceau s         | -                                | -                 | -                | -                | -                |                  | -                 | 4.45            | 8.65            | 8.37            | 8.18            | 7.91            | -                | -                | -                | -                | - |
| 0V**              | 15.66                            | 15.39             | 15.17            | 15.13            | 15.08            | 15.05            | 14.97             | 4.35            | 8.62            | 8.34            | 8.15            | 7.89            | 3.40             | 3.35             | 3.30             | 3.27             |   |
| 1.2V**            | 15.6                             | 15.36             | 15.15            | 15.11            | 15.05            | 15.03            | 14.9              | 4.33            | 8.60            | 8.31            | 8.13            | 7.87            | 3.37             | 3.32             | 3.27             | 3.24             |   |

|                                        |       |       |       |       |       |       |       |       |       |       |       |       |       |       |       |       |
|----------------------------------------|-------|-------|-------|-------|-------|-------|-------|-------|-------|-------|-------|-------|-------|-------|-------|-------|
|                                        | 4     |       |       |       |       |       | 5     |       |       |       |       |       |       |       |       |       |
| $\Delta\delta$ (0 V-B-N-O-H nanofoams) | -0.03 | -0.03 | -     | -     | -     | -     | -0.03 | -     | -     | -     | -     | -     | -     | -     | -     | -     |
| $\Delta\delta$ (0 V-Ponceau s)         | -     | -     | -     | -     | -     | -     | -     | -0.10 | -0.03 | -0.03 | -0.03 | -0.02 | -     | -     | -     | -     |
| $\Delta\delta$ (1.2V-0 V)              | -0.02 | -0.03 | -0.02 | -0.02 | -0.03 | -0.02 | -0.02 | -0.02 | -0.02 | -0.03 | -0.02 | -0.02 | -0.02 | -0.02 | -0.03 | -0.03 |

*Note:* \* indicates the atoms from the dye ions; the number behind them corresponding to their location in the dye ions;  
\*\* means the B-N-O-H nanofoams charged at those voltages in the 600mgL<sup>-1</sup> dyes.

**Table S35** Comparison of Solid state  $^{33}\text{S}$  NMR shifts for B-N-O-H nanofoams, Methyl orange, B-N-O-H nanofoams after being charged in  $600\text{mgL}^{-1}$  Methyl orange at 0 V and 1.2 V, respectively.

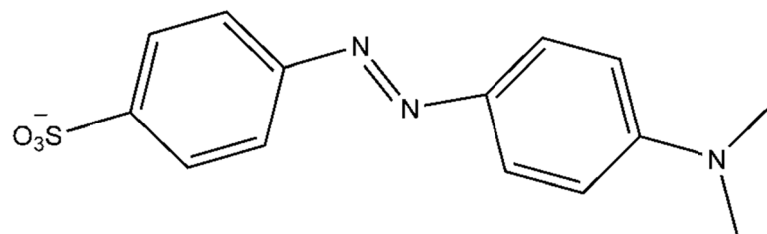

| Samples                                 | Chemical shifts of S atoms<br>/ ppm |
|-----------------------------------------|-------------------------------------|
|                                         | S*                                  |
| B-N-O-H nanofoams                       | -                                   |
| Methyl orange                           | -7.2                                |
| 0V**                                    | -7.7                                |
| 1.2V**                                  | -8.0                                |
| $\Delta\delta$ (0 V- B-N-O-H nanofoams) | -                                   |
| $\Delta\delta$ (0 V- Methyl orange)     | -0.5                                |
| $\Delta\delta$ (1.2V- 0 V)              | -0.3                                |

*Note:* \* indicates the atoms from the dye ions; the number behind them corresponding to their location in the dye ions;

\*\* means the B-N-O-H nanofoams charged at those voltages in the  $600\text{mgL}^{-1}$  dyes.

**Table S36** Comparison of Solid state  $^{17}\text{O}$  NMR shifts for B-N-O-H nanofoams, Methyl orange, B-N-O-H nanofoams after being charged in  $600\text{mgL}^{-1}$  Methyl orange at 0 V and 1.2 V, respectively.

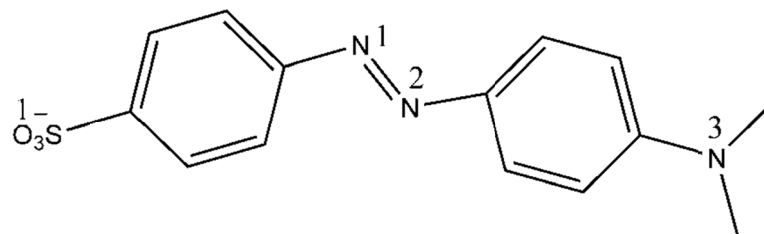

| Samples                                 | Chemical shifts of O atoms / ppm |                   |       |                 |       |       |       |      |
|-----------------------------------------|----------------------------------|-------------------|-------|-----------------|-------|-------|-------|------|
|                                         | OB <sub>1/3</sub>                | OB <sub>1/4</sub> | O*-1  | ON <sub>2</sub> | ON*-1 | ON*-2 | ON*-3 | OH   |
| B-N-O-H nanofoams                       | 145.0                            | 123.0             | -     | 112.0           | -     | -     | -     | 50.0 |
| Methyl orange                           | -                                | -                 | 134.8 | -               | -     | -     | -     | -    |
| 0V**                                    | 144.5                            | 122.5             | 134.0 | 111.5           | 86.2  | 84.1  | 80.0  | 49.5 |
| 1.2V**                                  | 144.2                            | 122.2             | 133.5 | 111.1           | 85.7  | 83.6  | 79.4  | 49.2 |
| $\Delta\delta$ (0 V- B-N-O-H nanofoams) | -0.5                             | -0.5              | -     | -0.5            | -     | -     | -     | -0.5 |
| $\Delta\delta$ (0 V- Methyl orange)     | -                                | -                 | -0.8  | -               | -     | -     | -     | -    |
| $\Delta\delta$ (1.2V- 0 V)              | -0.3                             | -0.3              | -0.5  | -0.4            | -0.5  | -0.5  | -0.6  | -0.3 |

*Note:* \* indicates the atoms from the dye ions; the number behind them corresponding to their location in the dye ions;

\*\* means the B-N-O-H nanofoams charged at those voltages in the  $600\text{mgL}^{-1}$  dyes.

**Table S37** Comparison of Solid state  $^{15}\text{N}$  NMR shifts for B-N-O-H nanofoams, Methyl orange, B-N-O-H nanofoams after being charged in  $600\text{mgL}^{-1}$  Methyl orange at 0 V and 1.2 V, respectively.

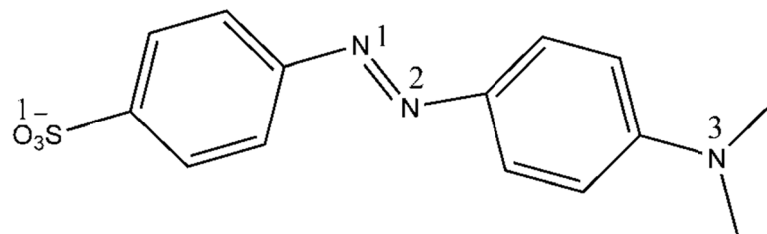

| Samples                                 | Chemical shifts of N atoms / ppm |                   |                 |                 |                   |                  |                  |                  |
|-----------------------------------------|----------------------------------|-------------------|-----------------|-----------------|-------------------|------------------|------------------|------------------|
|                                         | NB <sub>1/3</sub>                | NB <sub>1/4</sub> | NO <sub>2</sub> | NH <sub>2</sub> | NO <sup>*-1</sup> | N <sup>*-1</sup> | N <sup>*-2</sup> | N <sup>*-3</sup> |
| B-N-O-H nanofoams                       | 133.0                            | 92.0              | 56.0            | -30.0           | -                 | -                | -                | -                |
| Methyl orange                           | -                                | -                 | -               | -               | -                 | -203.6           | -218.0           | -242.9           |
| 0V**                                    | 132.5                            | 91.5              | 55.5            | -30.5           | 3.3               | -207.0           | -222.0           | -245.0           |
| 1.2V**                                  | 132.2                            | 91.3              | 55.2            | -30.7           | 2.8               | -209.0           | -224.0           | -246.0           |
| $\Delta\delta$ (0 V- B-N-O-H nanofoams) | -0.5                             | -0.5              | -0.5            | -0.5            | -                 | -                | -                | -                |
| $\Delta\delta$ (0 V- Methyl orange)     | -                                | -                 | -               | -               | -                 | -3.4             | -4.0             | -2.1             |
| $\Delta\delta$ (1.2V- 0 V)              | -0.3                             | -0.2              | -0.3            | -0.2            | -0.5              | -2.0             | -2.0             | -1.0             |

*Note:* \* indicates the atoms from the dye ions; the number behind them corresponding to their location in the dye ions;

\*\* means the B-N-O-H nanofoams charged at those voltages in the  $600\text{mgL}^{-1}$  dyes.



**Table S38** Comparison of Solid state  $^{13}\text{C}$  NMR shifts for B-N-O-H nanofoams, Methyl orange, B-N-O-H nanofoams after being charged in  $600\text{mgL}^{-1}$  Methyl orange at 0 V and 1.2 V, respectively.

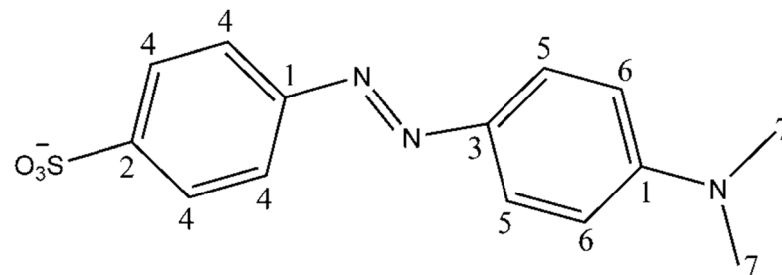

| Samples                                 | Chemical shifts of C atoms / ppm |       |       |       |       |       |      |
|-----------------------------------------|----------------------------------|-------|-------|-------|-------|-------|------|
|                                         | C*-1                             | C*-2  | C*-3  | C*-4  | C*-5  | C*-6  | C*-7 |
| B-N-O-H nanofoams                       | -                                | -     | -     | -     | -     | -     | -    |
| Methyl orange                           | 151.0                            | 148.0 | 141.0 | 125.0 | 120.5 | 111.0 | 38.7 |
| 0V**                                    | 150.7                            | 147.8 | 140.6 | 124.7 | 120.2 | 110.8 | 38.5 |
| 1.2V**                                  | 150.5                            | 141.5 | 140.3 | 124.5 | 119.9 | 110.6 | .8.3 |
| $\Delta\delta$ (0 V- B-N-O-H nanofoams) | -                                | -     | -     | -     | -     | -     | -    |
| $\Delta\delta$ (0 V- Methyl orange)     | -0.3                             | -0.2  | -0.4  | -0.3  | -0.3  | -0.2  | -0.2 |
| $\Delta\delta$ (1.2V- 0 V)              | -0.2                             | -0.3  | -0.3  | -0.2  | -0.3  | -0.2  | -0.2 |

*Note:* \* indicates the atoms from the dye ions; the number behind them corresponding to their location in the dye ions;

\*\* means the B-N-O-H nanofoams charged at those voltages in the  $600\text{mgL}^{-1}$  dyes.

**Table S39** Comparison of Solid state  $^{11}\text{B}$  NMR shifts for B-N-O-H nanofoams, Methyl orange, B-N-O-H nanofoams after being charged in  $600\text{mgL}^{-1}$  Methyl orange at 0 V and 1.2 V, respectively.

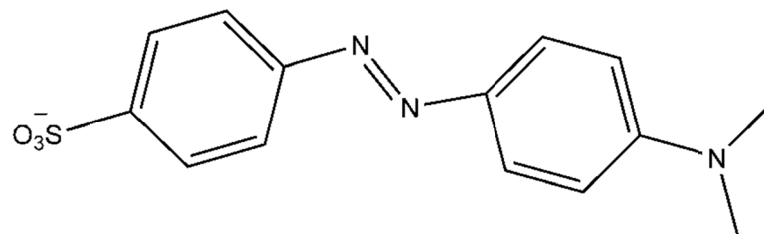

| Samples                                 | Chemical shifts of B atoms / ppm |                 |                 |                 |                 |                 |                 |
|-----------------------------------------|----------------------------------|-----------------|-----------------|-----------------|-----------------|-----------------|-----------------|
|                                         | BN <sub>3</sub>                  | BN <sub>3</sub> | BO <sub>3</sub> | BO <sub>3</sub> | BO <sub>4</sub> | BN <sub>4</sub> | BH <sub>2</sub> |
| B-N-O-H nanofoams                       | 19.2                             | 16.0            | 15.7            | 12.5            | 6.0             | 1.7             | -4.0            |
| Methyl orange                           | -                                | -               | -               | -               | -               | -               | -               |
| 0V**                                    | 19.0                             | 15.8            | 15.5            | 12.3            | 5.8             | 1.5             | -4.2            |
| 1.2V**                                  | 18.9                             | 15.6            | 15.4            | 12.2            | 5.6             | 1.4             | -4.4            |
| $\Delta\delta$ (0 V- B-N-O-H nanofoams) | -0.2                             | -0.2            | -0.2            | -0.2            | -0.2            | -0.2            | -0.2            |
| $\Delta\delta$ (0 V- Methyl orange)     | -                                | -               | -               | -               | -               | -               | -               |
| $\Delta\delta$ (1.2V- 0 V)              | -0.1                             | -0.2            | -0.1            | -0.1            | -0.2            | -0.1            | -0.2            |

*Note:* \* indicates the atoms from the dye ions; the number behind them corresponding to their location in the dye ions;  
 \*\* means the B-N-O-H nanofoams charged at those voltages in the  $600\text{mgL}^{-1}$  dyes.

**Table S40** Comparison of Solid state  $^1\text{H}$  NMR shifts for B-N-O-H nanofoams, Methyl orange, B-N-O-H nanofoams after being charged in  $600\text{mgL}^{-1}$  Methyl orange at 0 V and 1.2 V, respectively.

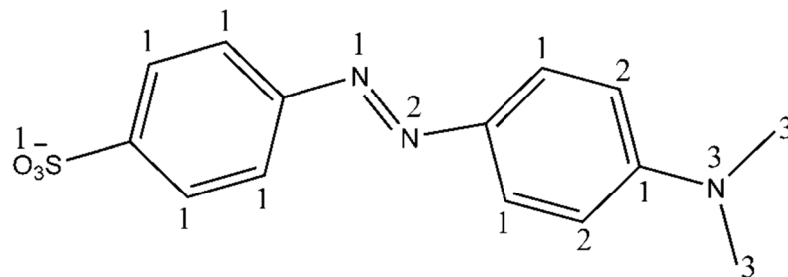

| Samples                                 | Chemical shifts of H atoms / ppm |                   |       |       |       |                   |       |       |       |       |
|-----------------------------------------|----------------------------------|-------------------|-------|-------|-------|-------------------|-------|-------|-------|-------|
|                                         | HO                               | HN <sub>1/2</sub> | HN*-1 | HN*-2 | HN*-3 | HB <sub>1/2</sub> | H*-3  | H*-2  | H*-3  | HO*-1 |
| B-N-O-H nanofoams                       | 15.69                            | 15.42             | -     | -     | -     | 15.00             | -     | -     | -     | -     |
| Methyl orange                           | -                                | -                 | -     | -     | -     | -                 | 7.60  | 6.80  | 2.92  | -     |
| 0V**                                    | 15.67                            | 15.40             | 15.23 | 15.19 | 15.12 | 14.98             | 7.58  | 6.78  | 2.90  | 3.63  |
| 1.2V**                                  | 15.66                            | 15.39             | 15.22 | 15.18 | 15.11 | 14.97             | 7.56  | 6.76  | 2.87  | 3.60  |
| $\Delta\delta$ (0 V- B-N-O-H nanofoams) | -0.02                            | -0.02             | -     | -     | -     | -0.02             | -     | -     | -     | -     |
| $\Delta\delta$ (0 V- Methyl orange)     | -                                | -                 | -     | -     | -     | -                 | -0.02 | -0.02 | -0.02 | -     |
| $\Delta\delta$ (1.2V- 0 V)              | -0.01                            | -0.01             | -0.01 | -0.01 | -0.01 | -0.01             | -0.02 | -0.02 | -0.03 | -0.03 |

*Note:* \* indicates the atoms from the dye ions; the number behind them corresponding to their location in the dye ions;

\*\* means the B-N-O-H nanofoams charged at those voltages in the  $600\text{mgL}^{-1}$  dyes.

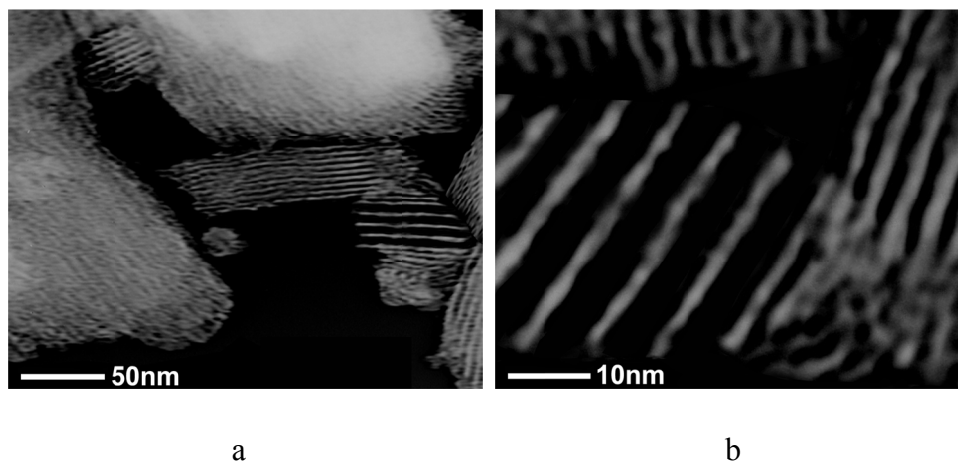

**Fig.S1** (a) Low resolution and (b) high resolution of the cross-sectional STEM images for the as-prepared B-N-O-H nanofoams obtained via ultrathin paraffin-embedded section.

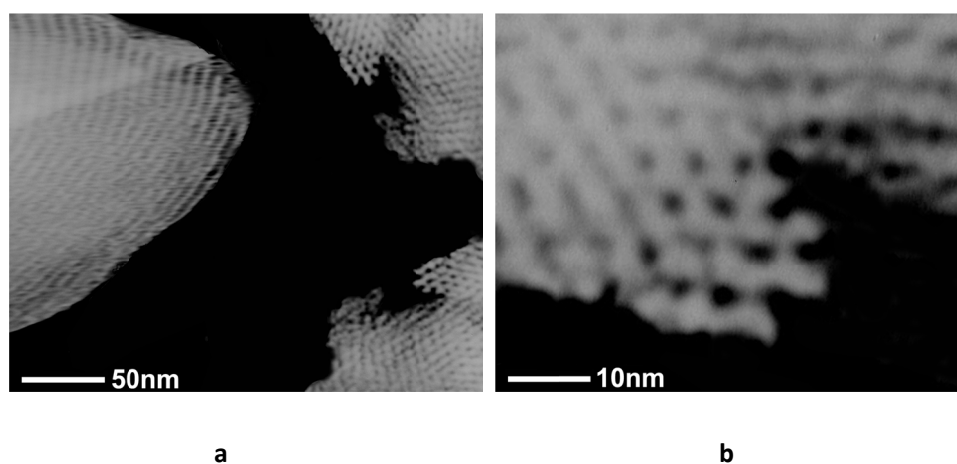

**Fig.S2** (a) Low resolution and (b) high resolution STEM images of the hexagonal patterns along the pore axis for the mesoporous  $\text{CuB}_{23}$  hosts obtained via ultrathin paraffin-embedded section. (The surface structure of the mesoporous  $\text{CuB}_{23}$  was not visible directly via STEM without ultrathin paraffin-embedded section, which is due to its unique dielectric properties).

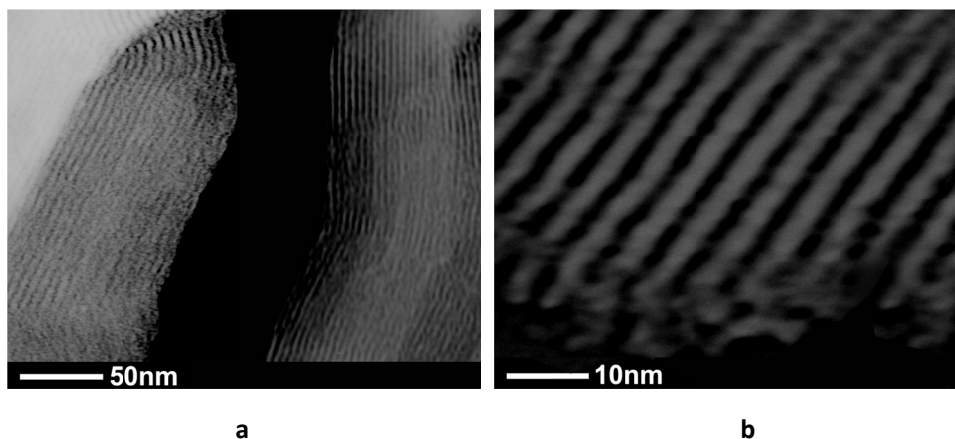

**Fig.S3** (a) Low resolution and (b) high resolution of the cross-sectional STEM images for the mesoporous  $\text{CuB}_{23}$  hosts obtained via ultrathin paraffin-embedded section. (The surface structure of the mesoporous  $\text{CuB}_{23}$  was not visible directly via STEM without ultrathin paraffin-embedded section, which is due to its unique dielectric properties).

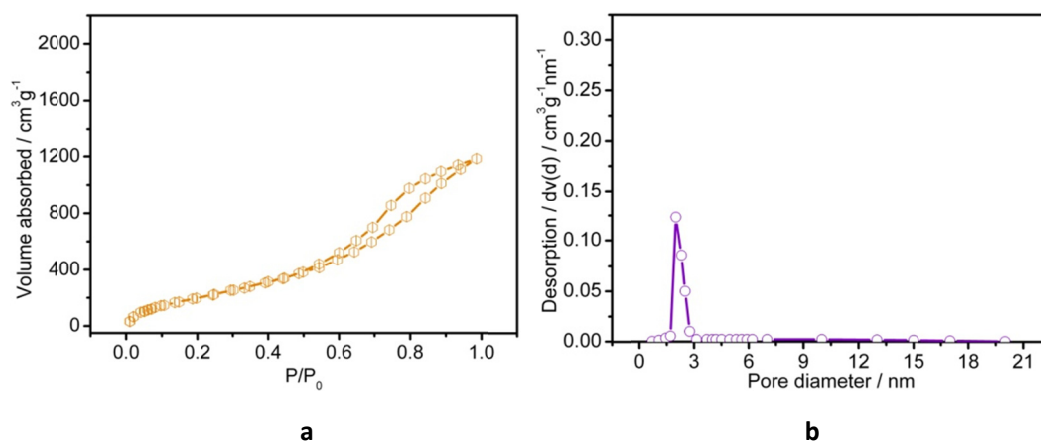

**Fig.S4** (a)  $\text{N}_2$  adsorption–desorption plots and (b) pore size distribution of the mesoporous  $\text{CuB}_{23}$  hosts.

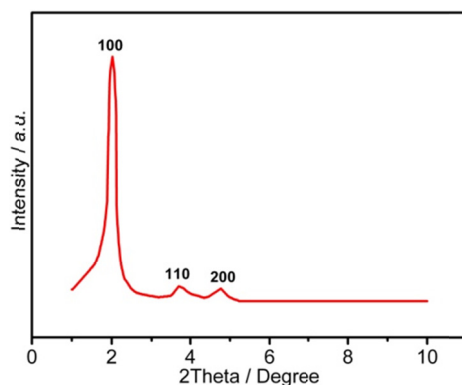

**Fig.S5** The small angle XRD pattern of the mesoporous  $\text{CuB}_{23}$  hosts.

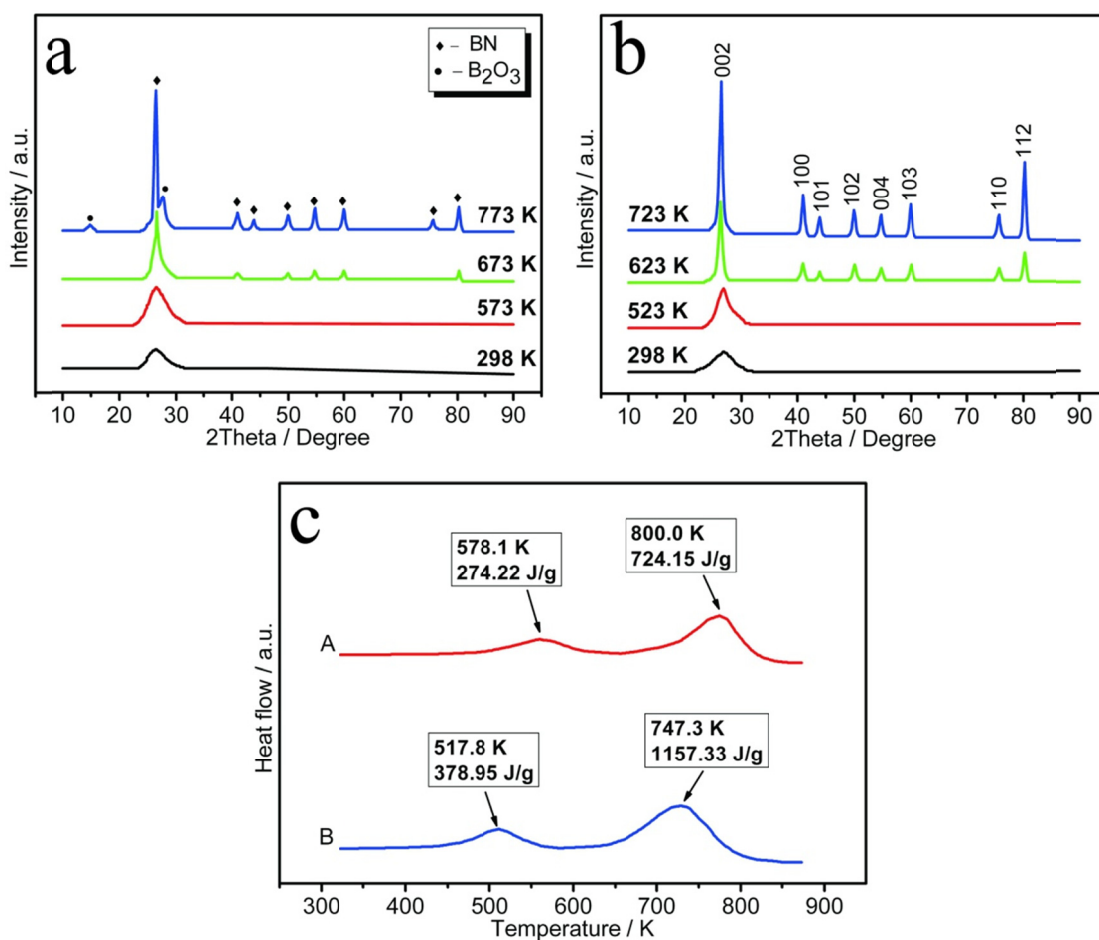

**Fig.S6** (a) XRD pattern of the as-prepared amorphous B-N-O-H nanofoams treated at different temperatures under Argon atmosphere; (b) XRD pattern of the as-prepared amorphous BN treated at different temperatures under Argon atmosphere; (c) DSC profiles of the as-prepared amorphous (A) B-N-O-H nanofoams and (B) BN.

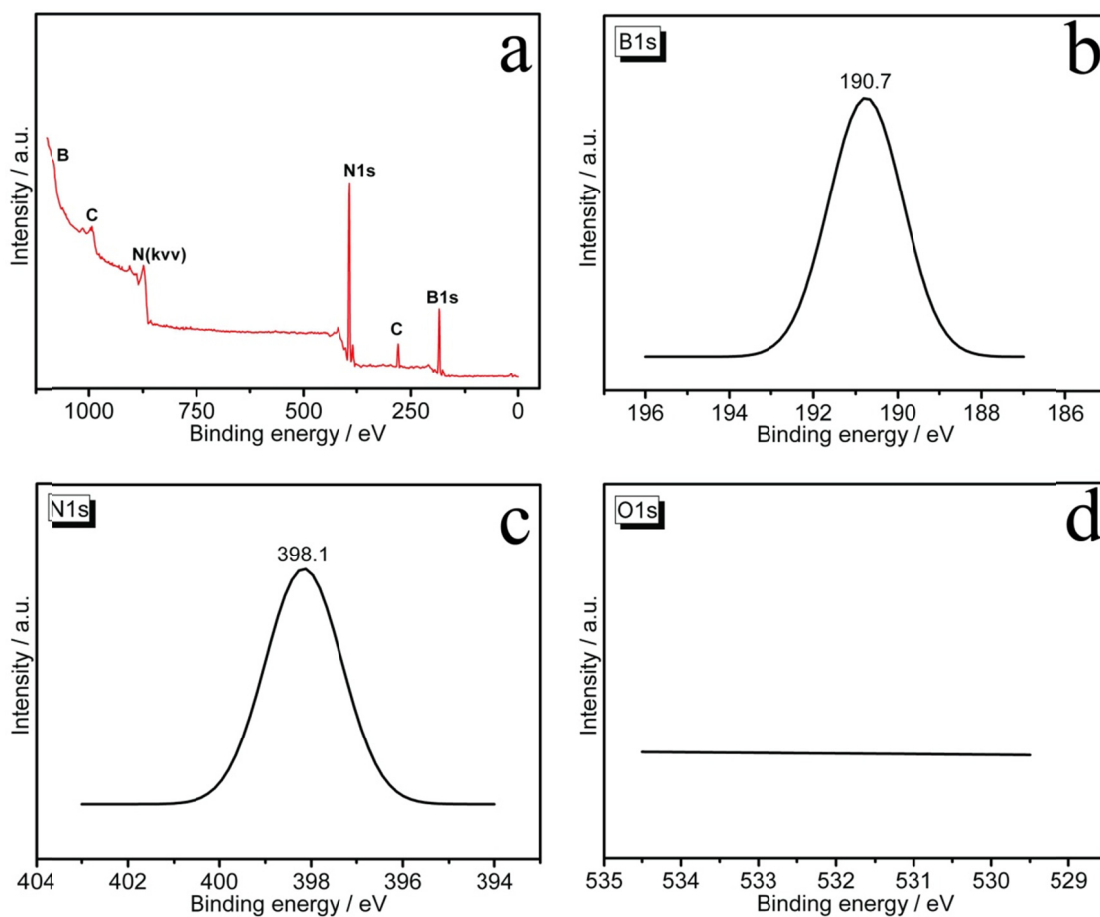

**Fig.S7** XPS spectra for the as prepared amorphous BN (a) survey spectrum; (b) B 1s; (c) N 1s and (d) O 1s spectra.

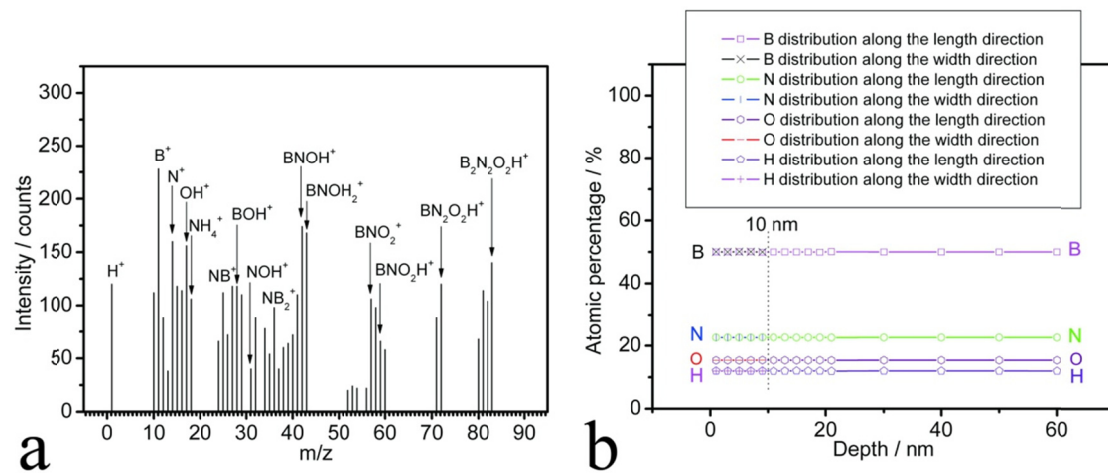

**Fig.S8** ToF-SIMS spectra of (a) the as-prepared amorphous B–N–O–H nanofoams and (b) the depth distribution of B, N, O and H along the width direction (0-10nm) and length direction (0-60nm) of B–N–O–H nanofoams obtained from the ToF-SIMS depth profiles.



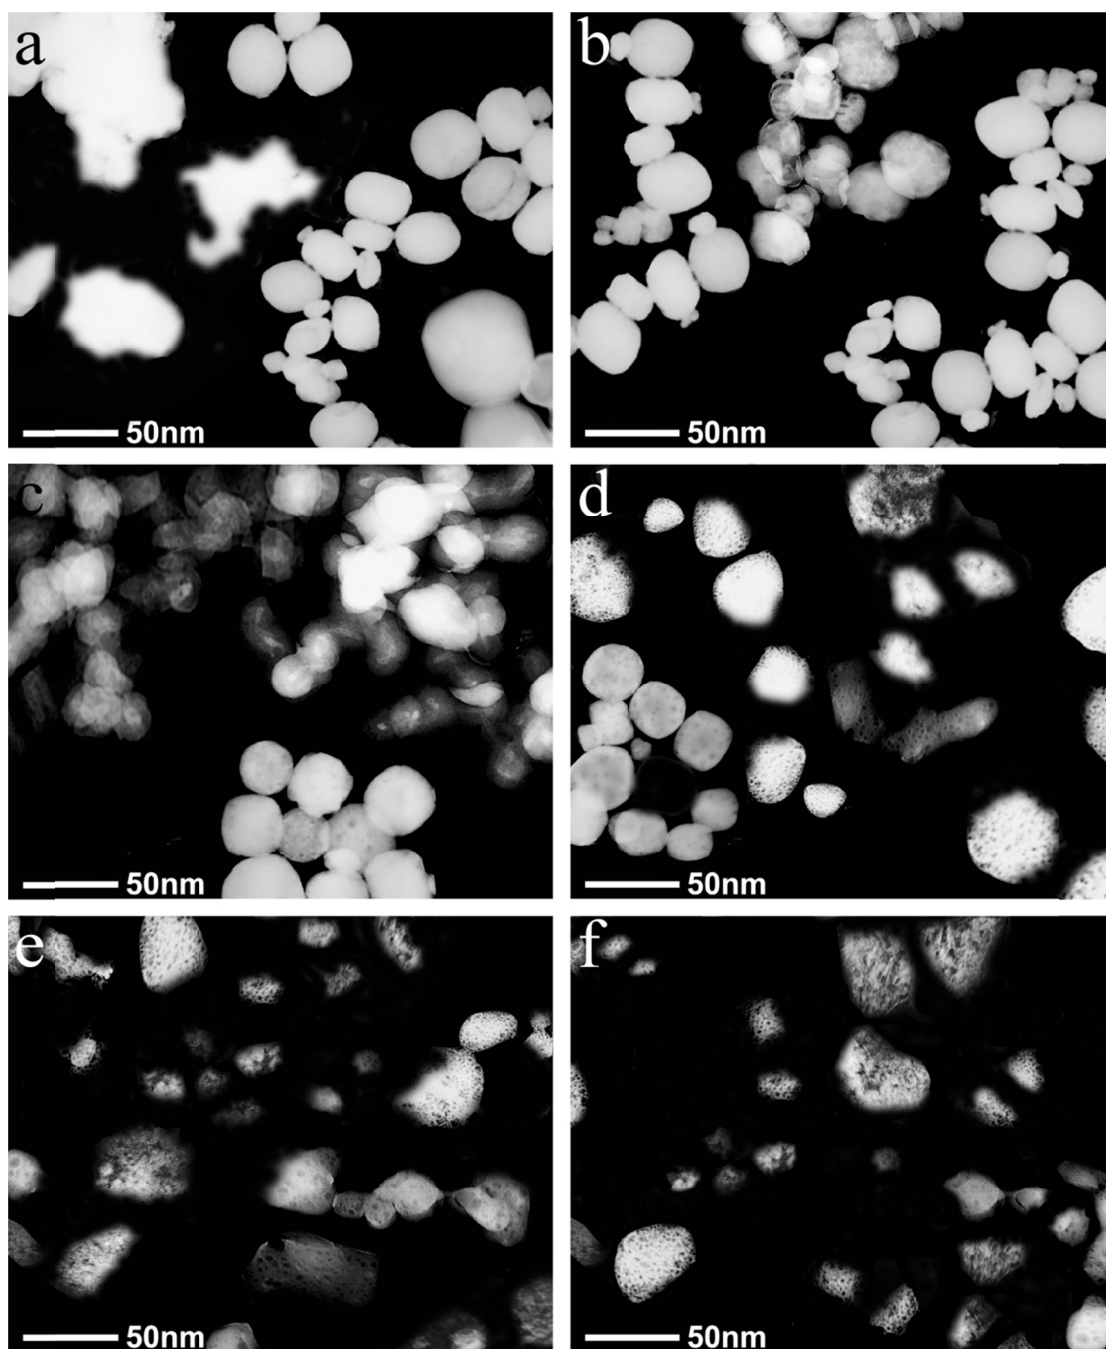

**Fig.S9** STEM images of the as-prepared amorphous B-N-O-H nanofoams during SPT: (a) 0 min, (b) 0.5 min; (c) 1 min; (d) 2 min; (e) 5 min and (f) 10 min.

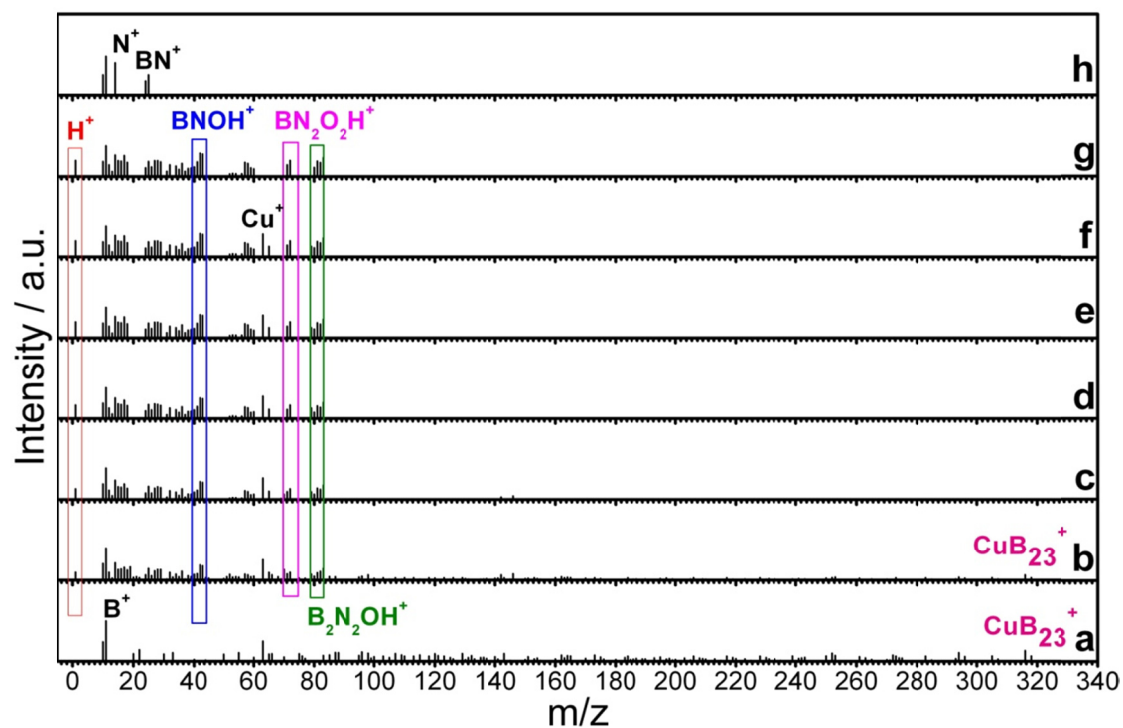

**Fig.S10** ToF-SIMS spectra of the as-prepared amorphous B-N-O-H nanofoams during SPT: (a) 0 min, (b) 0.5 min; (c) 1 min; (d) 2 min; (e) 5 min; (f) 10 min; (g) 10 min after acid wash and (h) commercial BN.

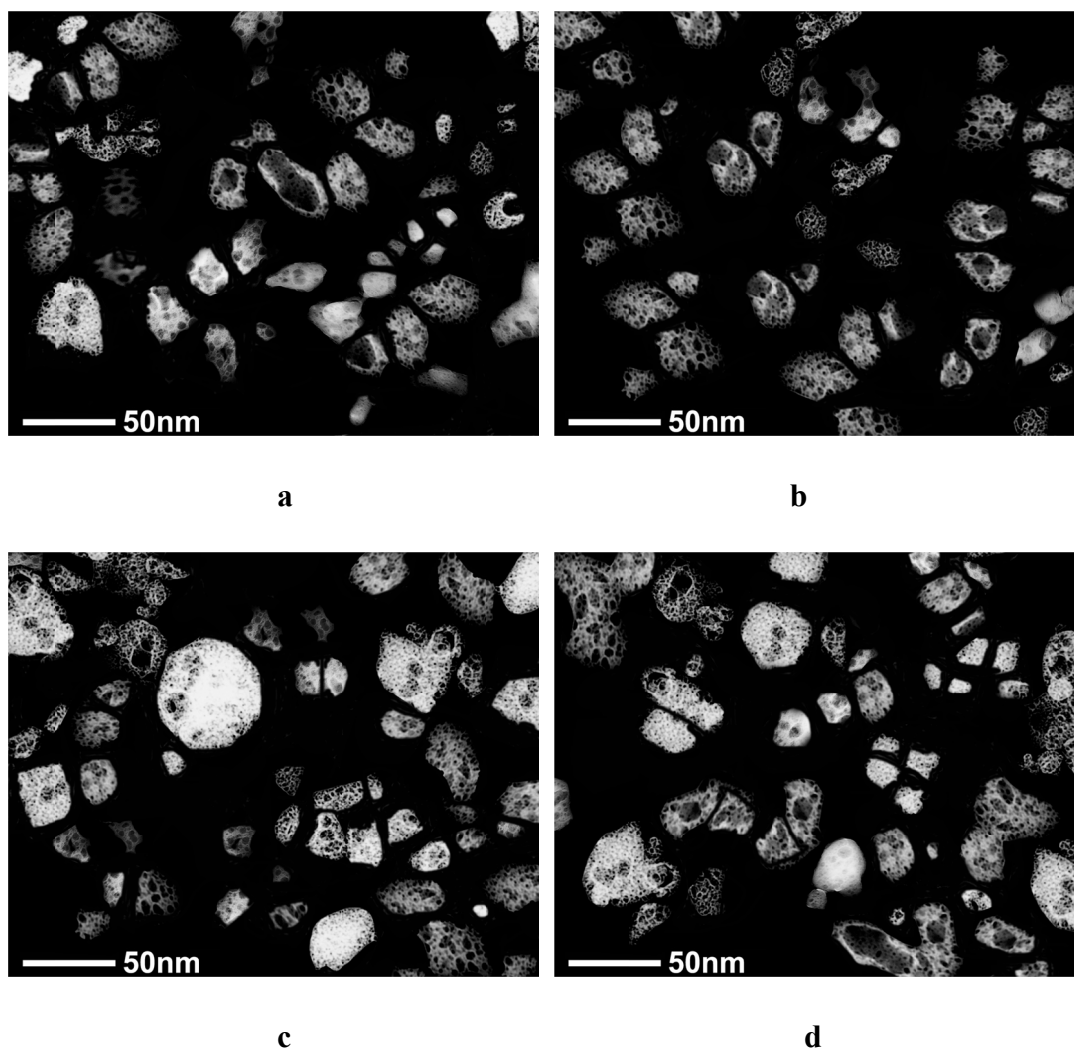

**Fig.S11** STEM images of B-N-O-H nanofoams prepared with (a) 30 mL [BMIM][BF<sub>4</sub>]; (b) 30 mL [BMIM]Cl; (c) 50 mL [BMIM][PF<sub>6</sub>]; (d) 100 mL [BMIM][PF<sub>6</sub>].

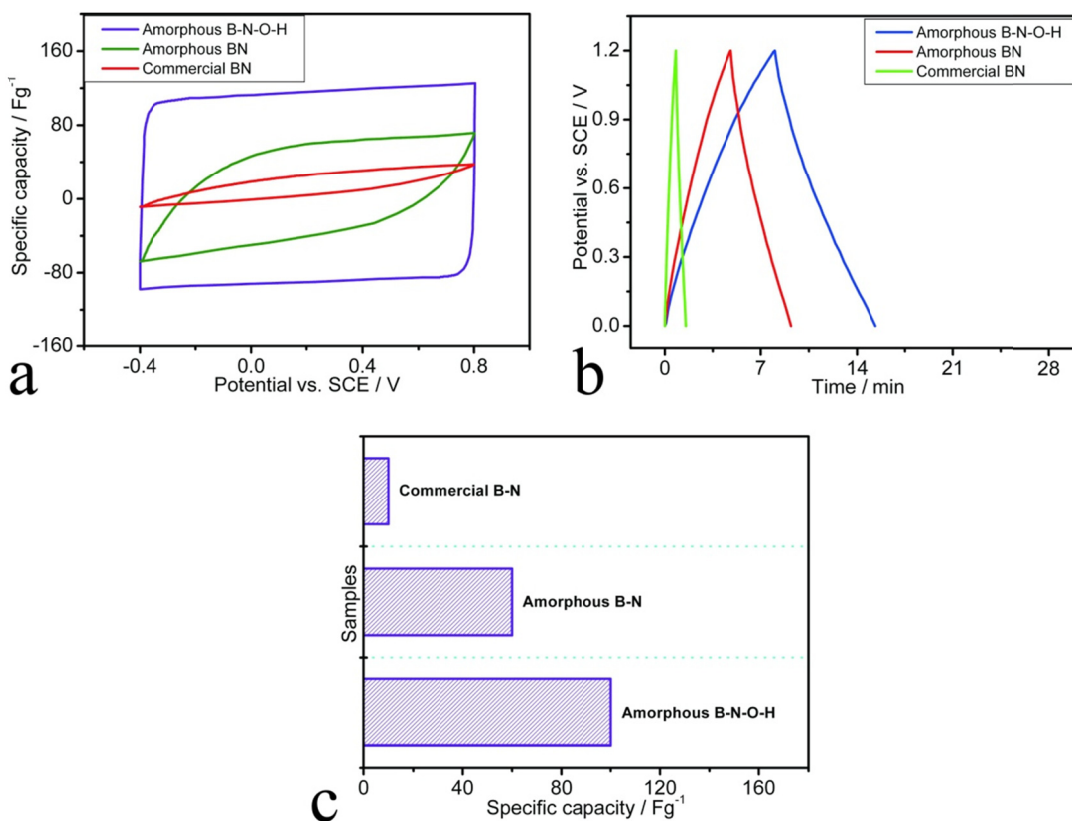

**Fig.S12** (a) CV curves of amorphous B-N-O-H prepared in this work, amorphous BN prepared in this work and commercial BN at  $5 \text{ mVs}^{-1}$  in  $600 \text{ mgL}^{-1}$  MB aqueous solution; (b) Charge-discharge profiles of amorphous B-N-O-H prepared in this work, amorphous BN prepared in this work and commercial BN at  $0.2 \text{ mAcm}^{-2}$  in  $600 \text{ mgL}^{-1}$  MB aqueous solution; and (c) Specific capacity of amorphous B-N-O-H prepared in this work, amorphous BN prepared in this work and commercial BN at  $0.2 \text{ mAcm}^{-2}$  in  $600 \text{ mgL}^{-1}$  MB aqueous solution.

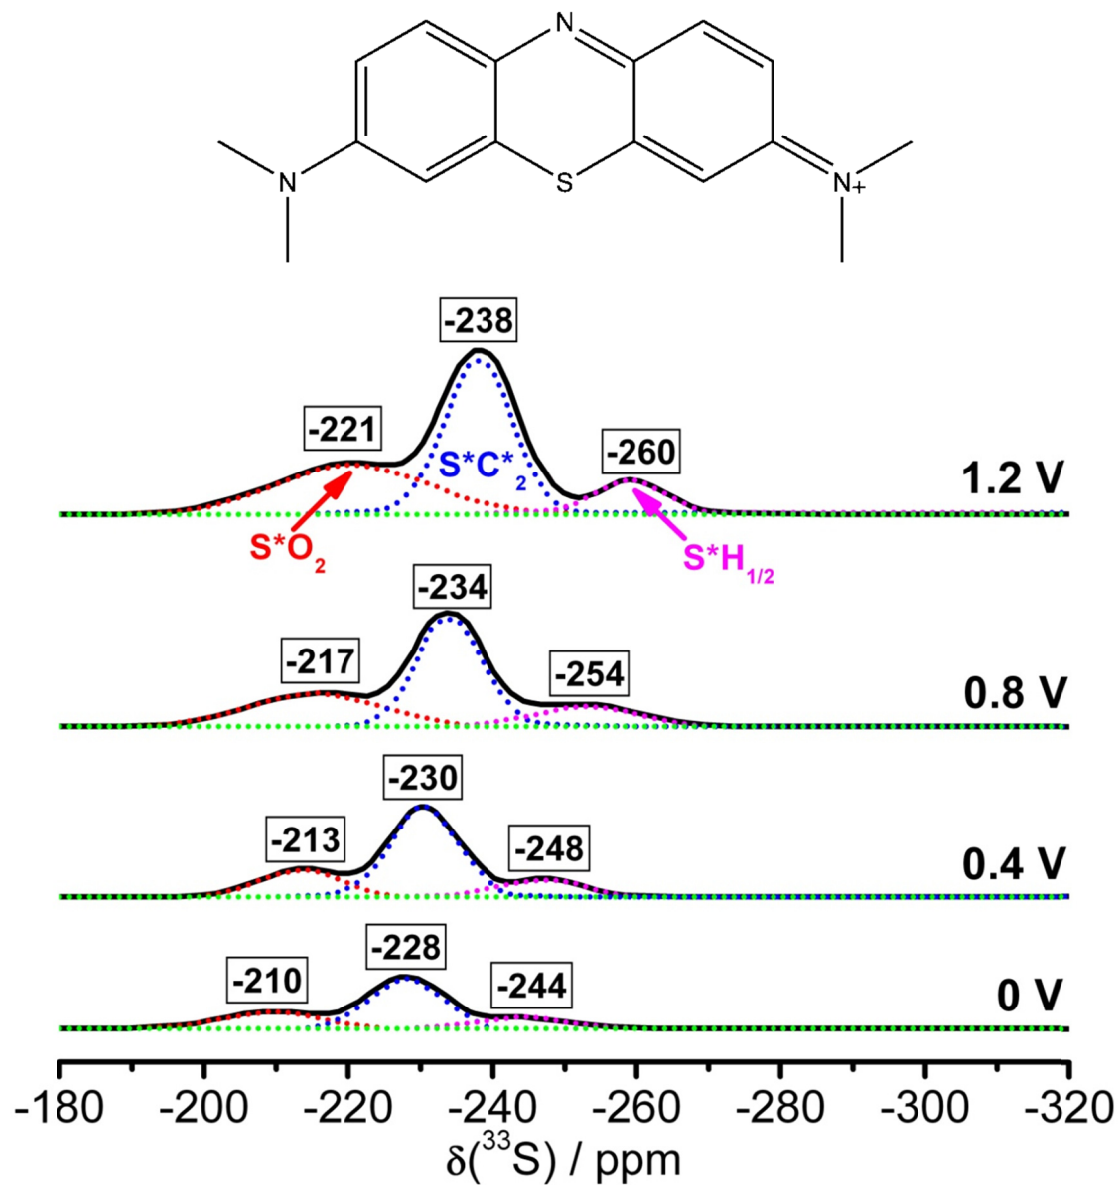

**Fig.S13** Solid state  $^{33}\text{S}$  NMR of amorphous B-N-O-H nanofoams after being charged in  $600\text{mgL}^{-1}$  MB at different voltages. (\* indicates the atoms from the dye ions; the number behind them corresponding to their location in the dye ions)

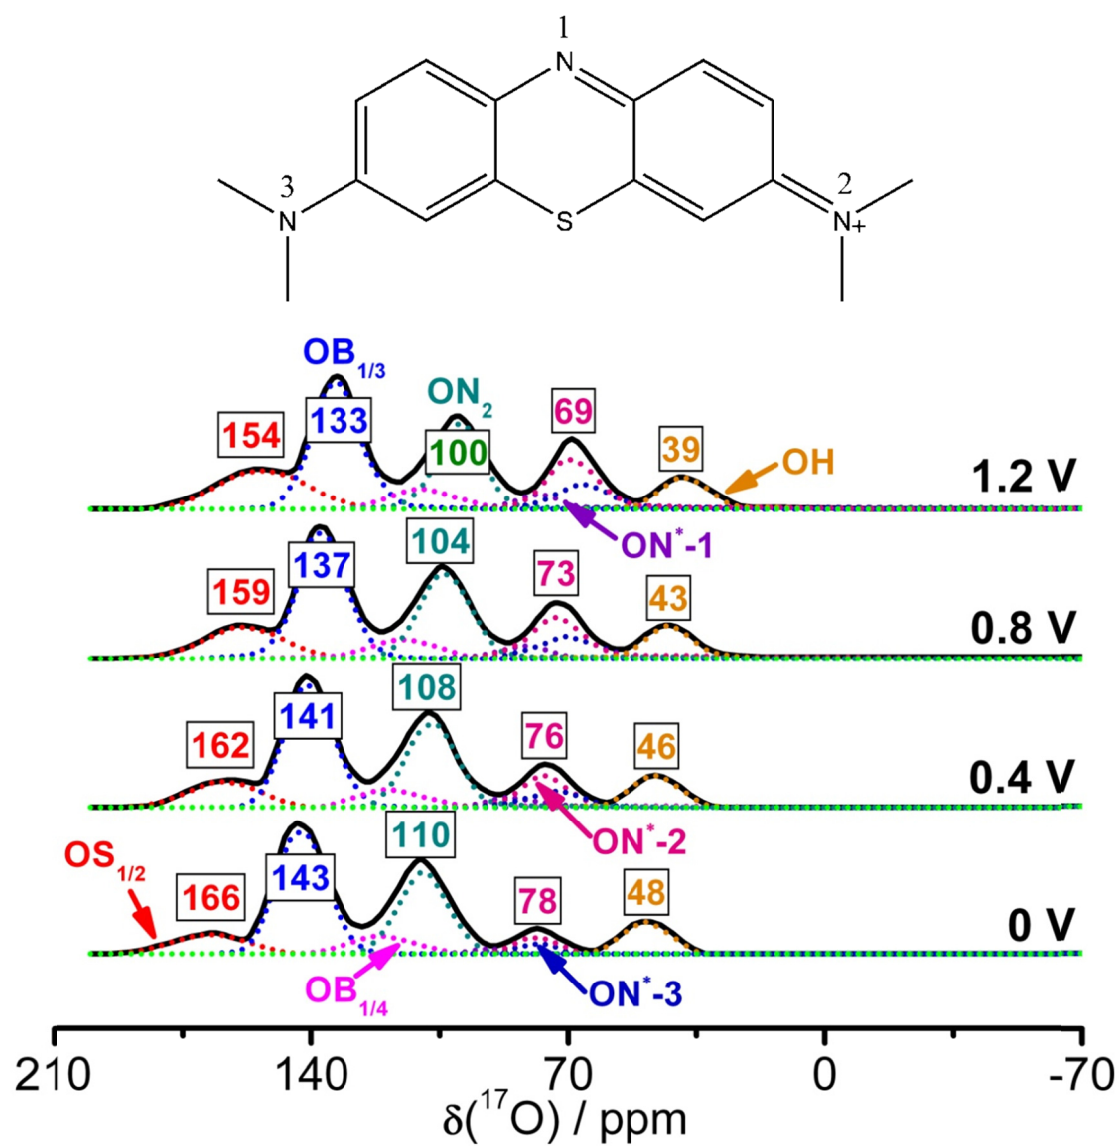

**Fig.S14** Solid state  $^{17}\text{O}$  NMR of amorphous B-N-O-H nanofoams after being charged in  $600\text{mgL}^{-1}$  MB at different voltages. (\* indicates the atoms from the dye ions; the number behind them corresponding to their location in the dye ions)

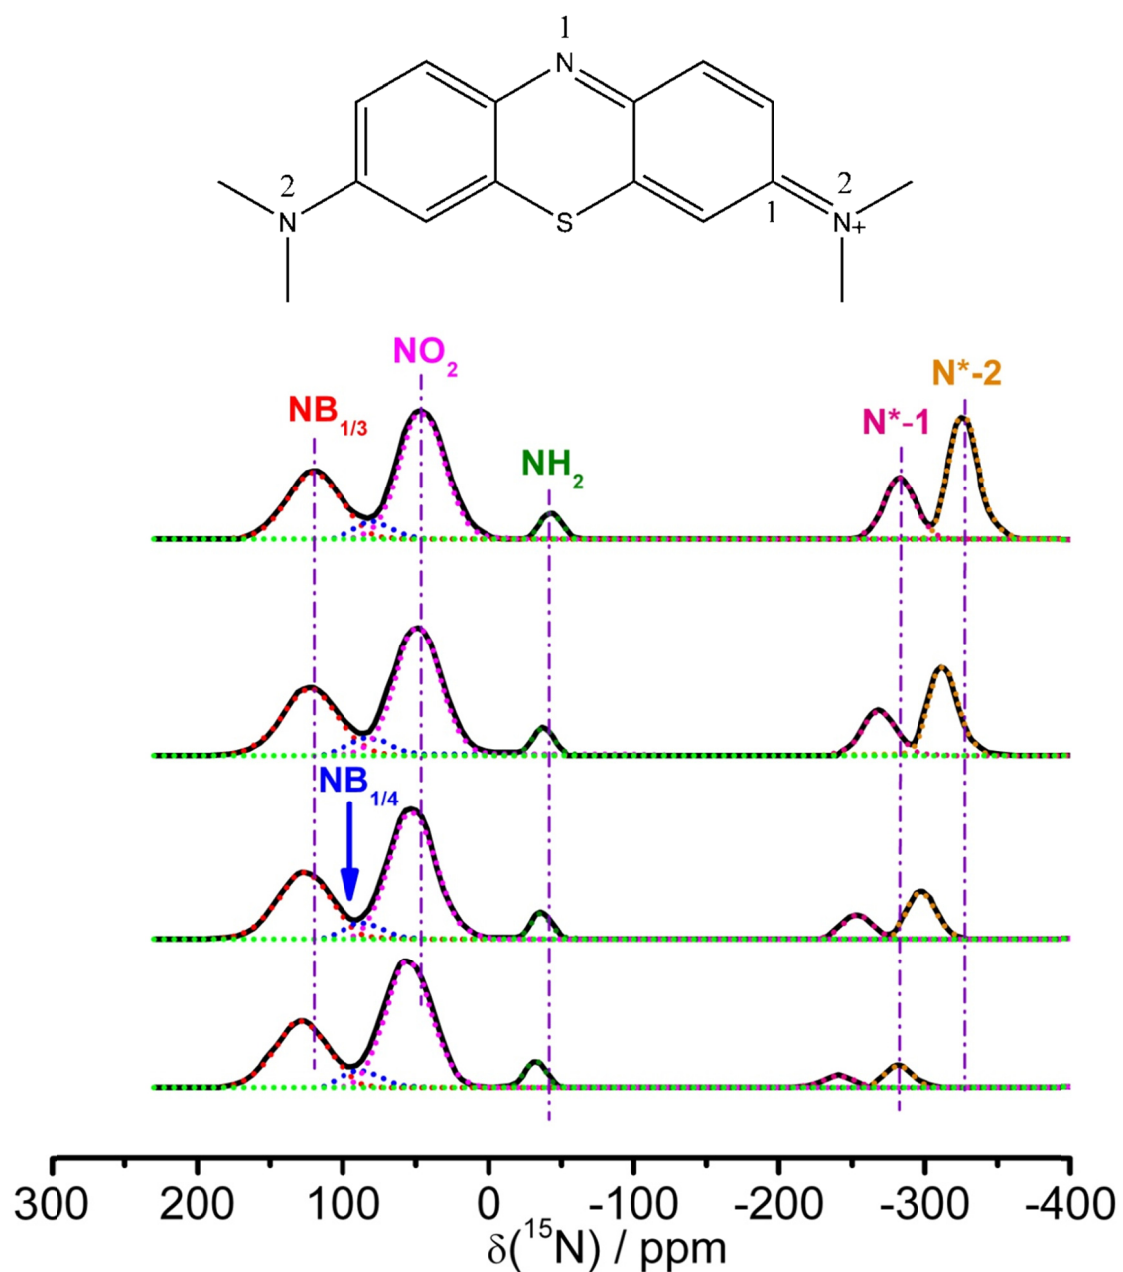

**Fig.S15** Solid state  $^{15}\text{N}$  NMR of amorphous B-N-O-H nanofoams after being charged in  $600\text{mgL}^{-1}$  MB at different voltages. (\* indicates the atoms from the dye ions; the number behind them corresponding to their location in the dye ions)

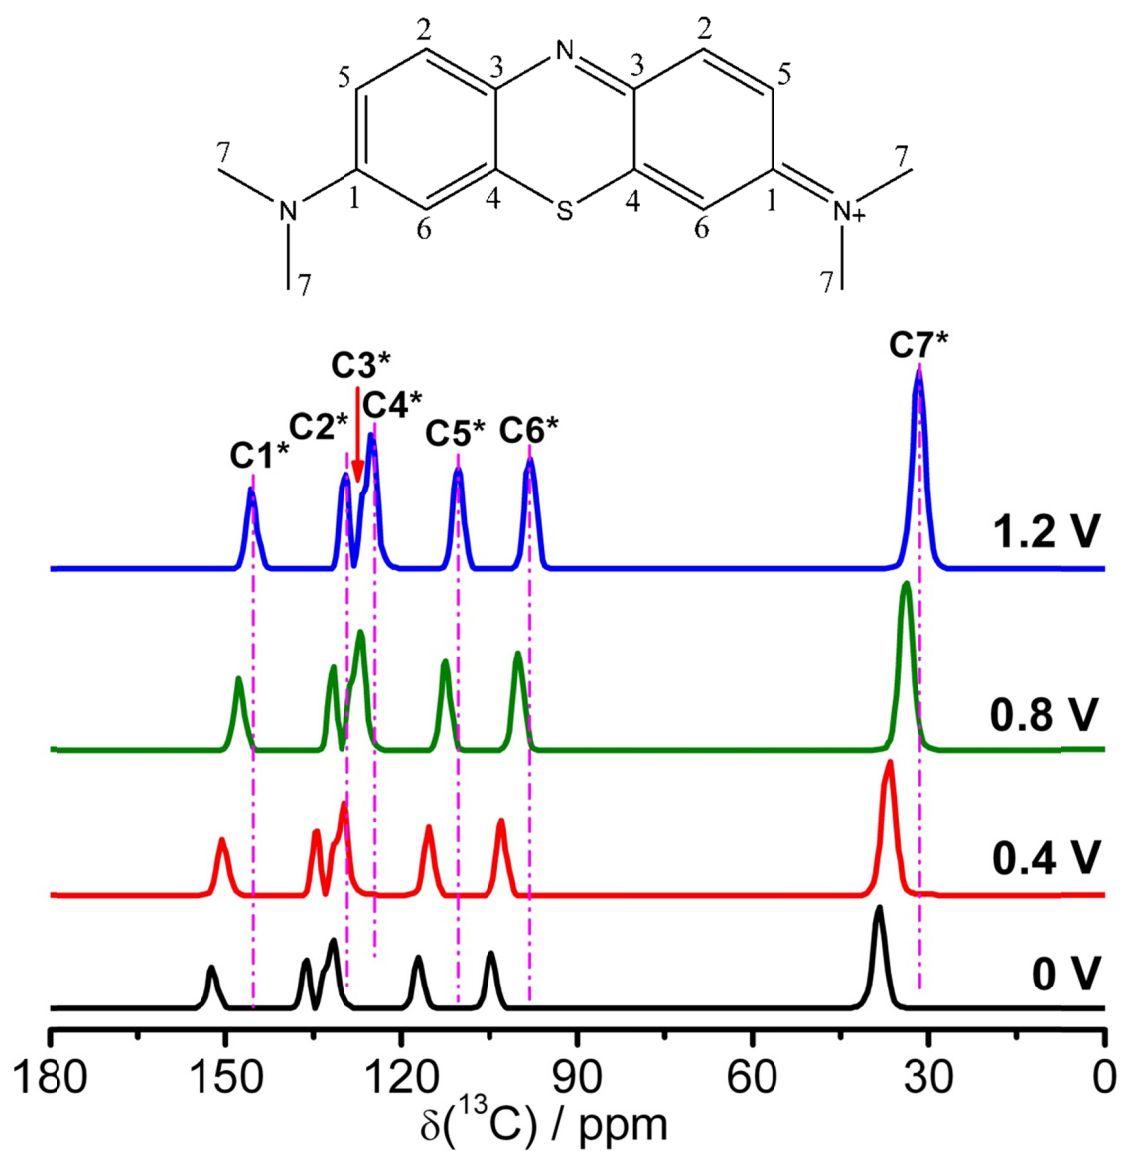

**Fig.S16** Solid state  $^{13}\text{C}$  NMR of amorphous B-N-O-H nanofoams after being charged in  $600\text{mgL}^{-1}$  MB at different voltages. (\* indicates the atoms from the dye ions; the number behind them corresponding to their location in the dye ions)



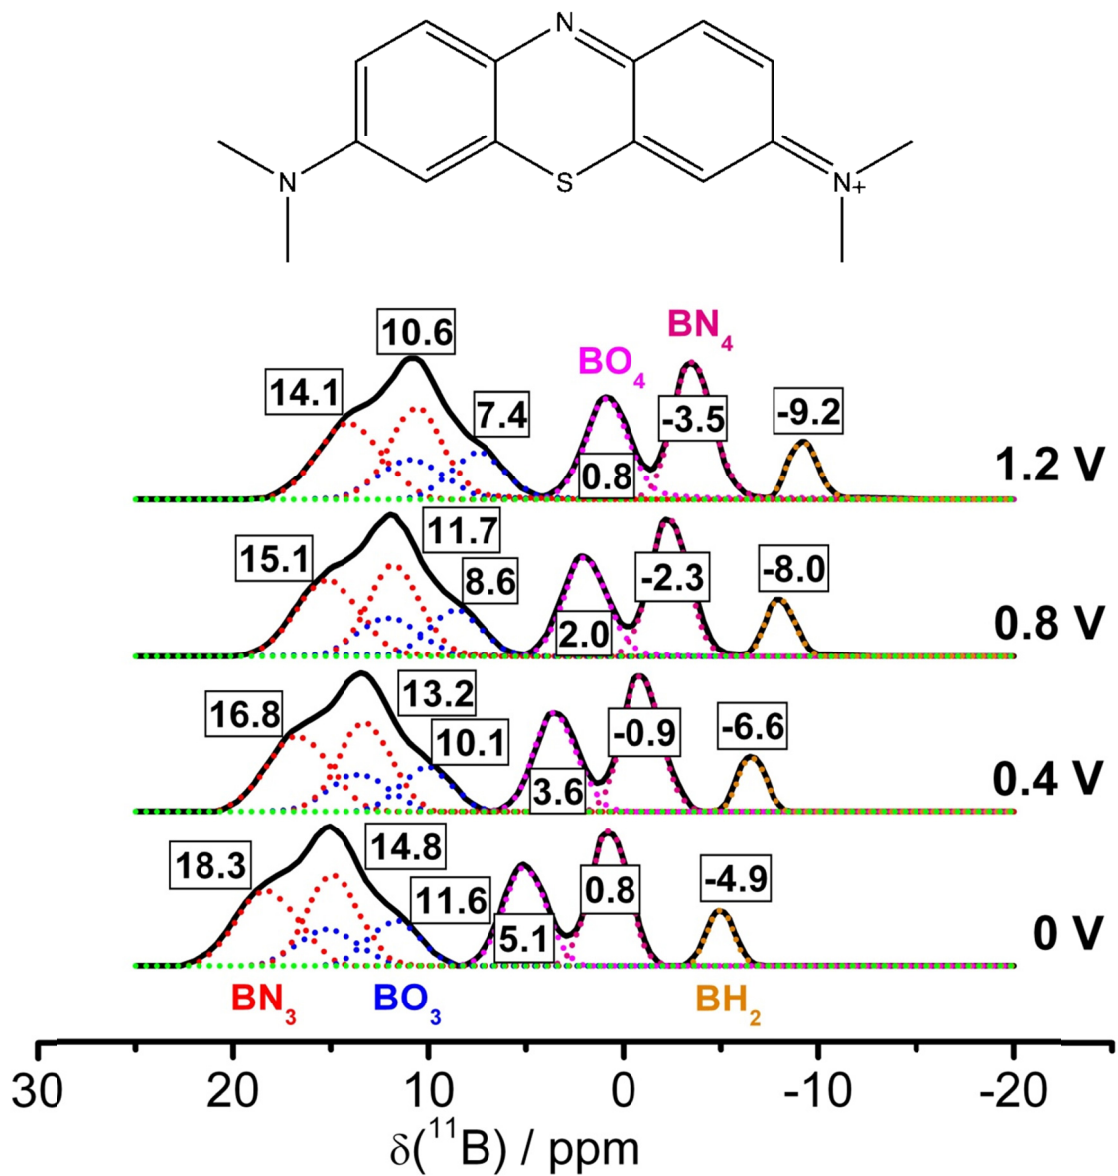

**Fig.S17** Solid state  $^{11}\text{B}$  NMR of amorphous B-N-O-H nanofoams after being charged in  $600\text{mgL}^{-1}$  MB at different voltages. (\* indicates the atoms from the dye ions; the number behind them corresponding to their location in the dye ions)

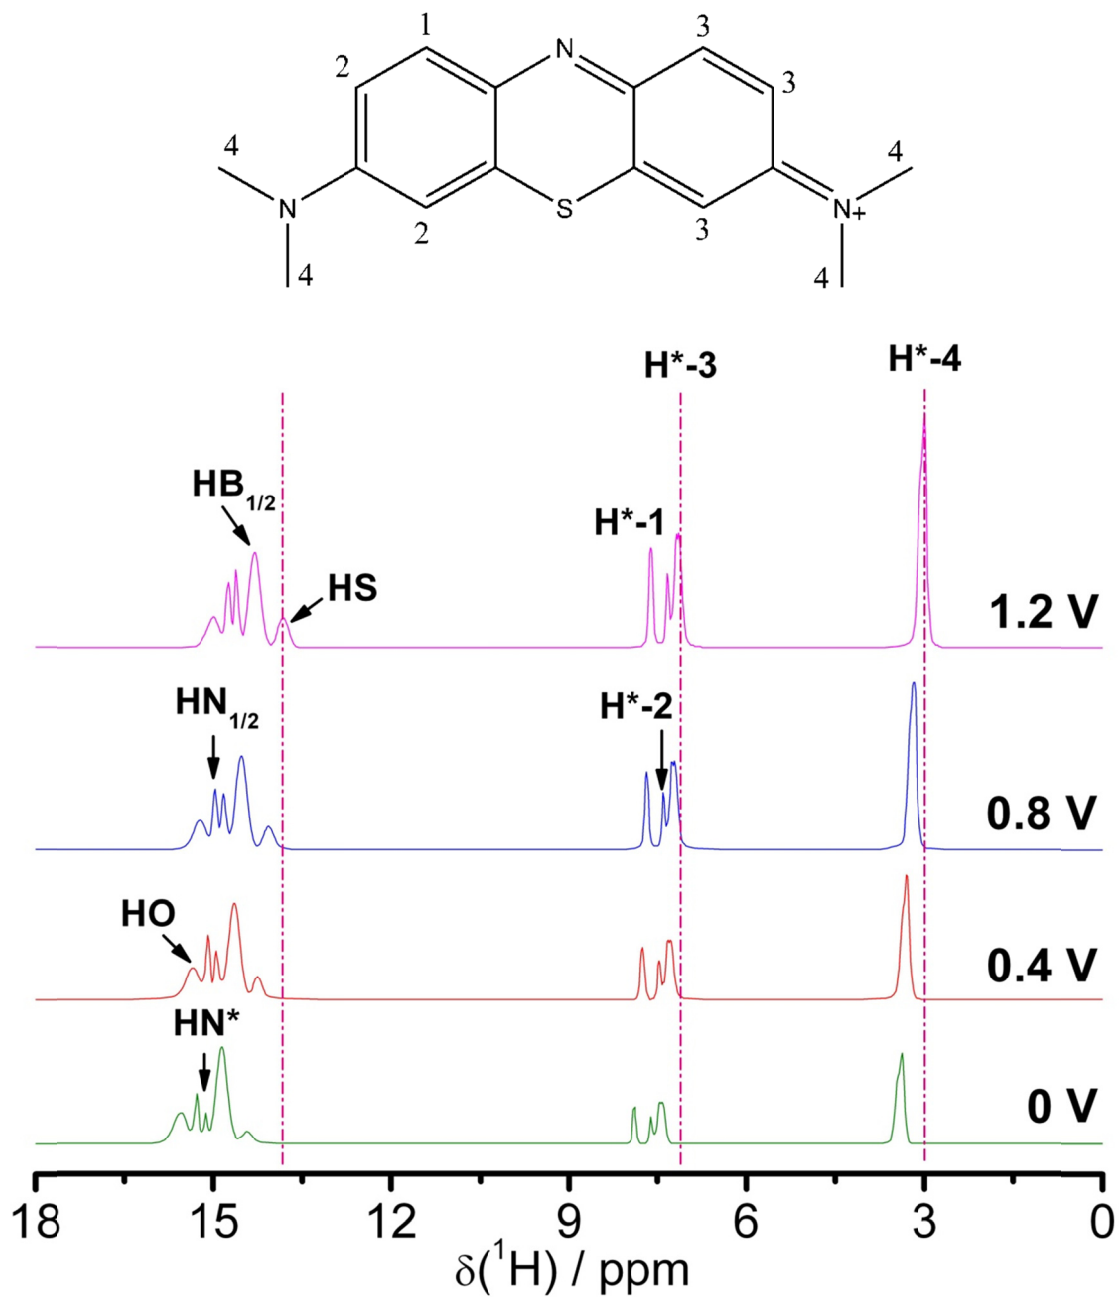

**Fig.S18** Solid state  $^1\text{H}$  NMR of amorphous B-N-O-H nanofoams after being charged in  $600\text{mgL}^{-1}$  MB at different voltages. (\* indicates the atoms from the dye ions; the number behind them corresponding to their location in the dye ions)

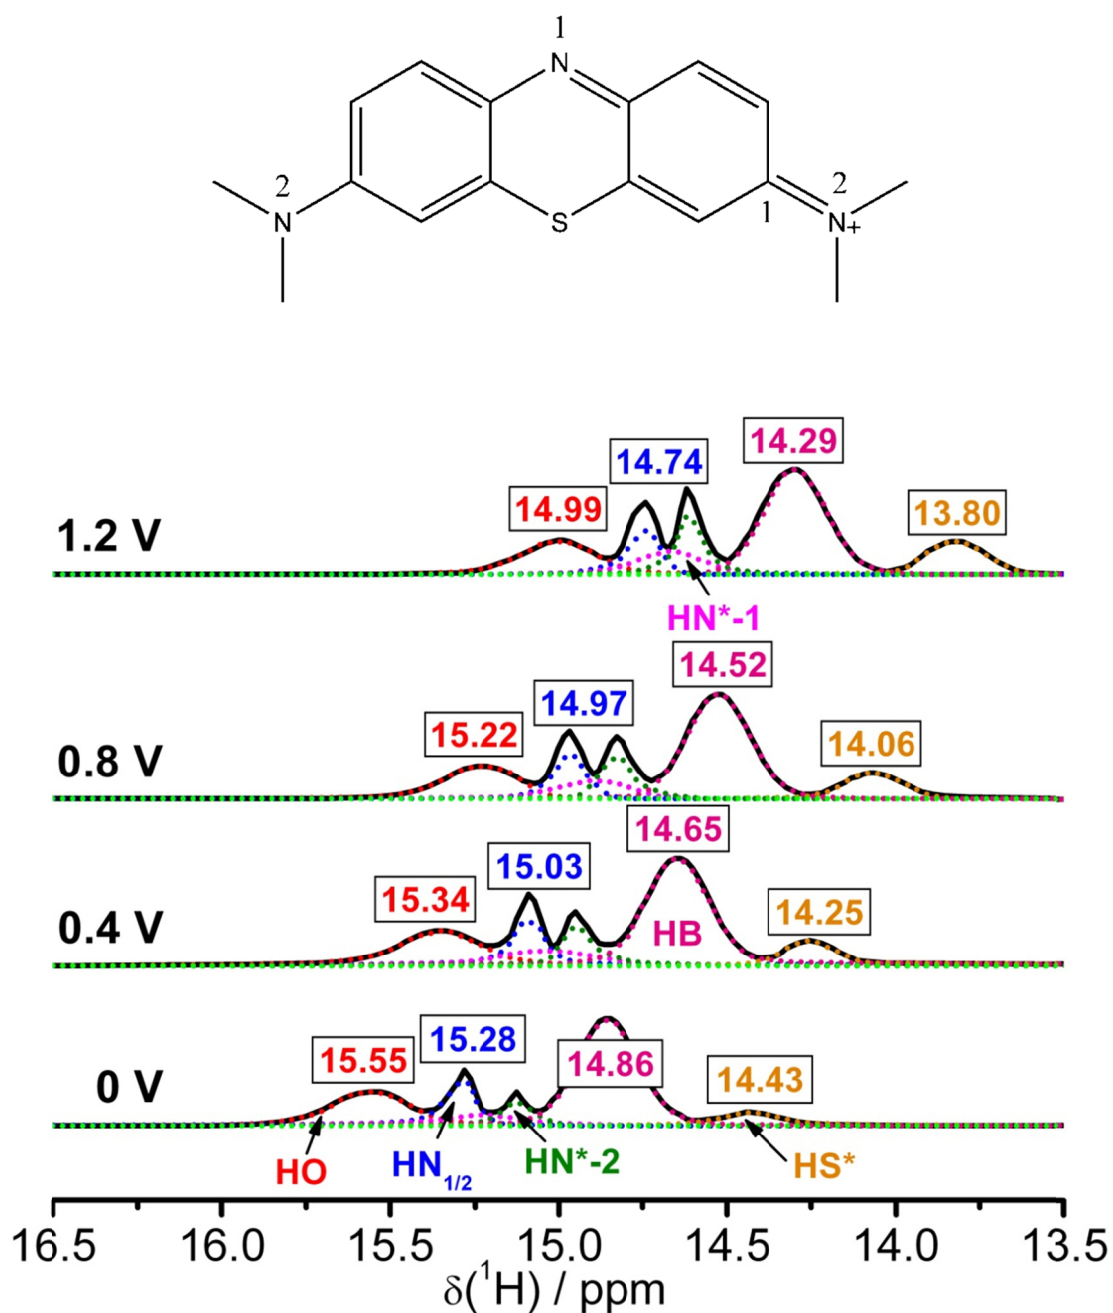

**Fig.S19** Solid state <sup>1</sup>H NMR of amorphous B-N-O-H nanofoams after being charged in 600mgL<sup>-1</sup> MB at different voltages. (\* indicates the atoms from the dye ions; the number behind them corresponding to their location in the dye ions)

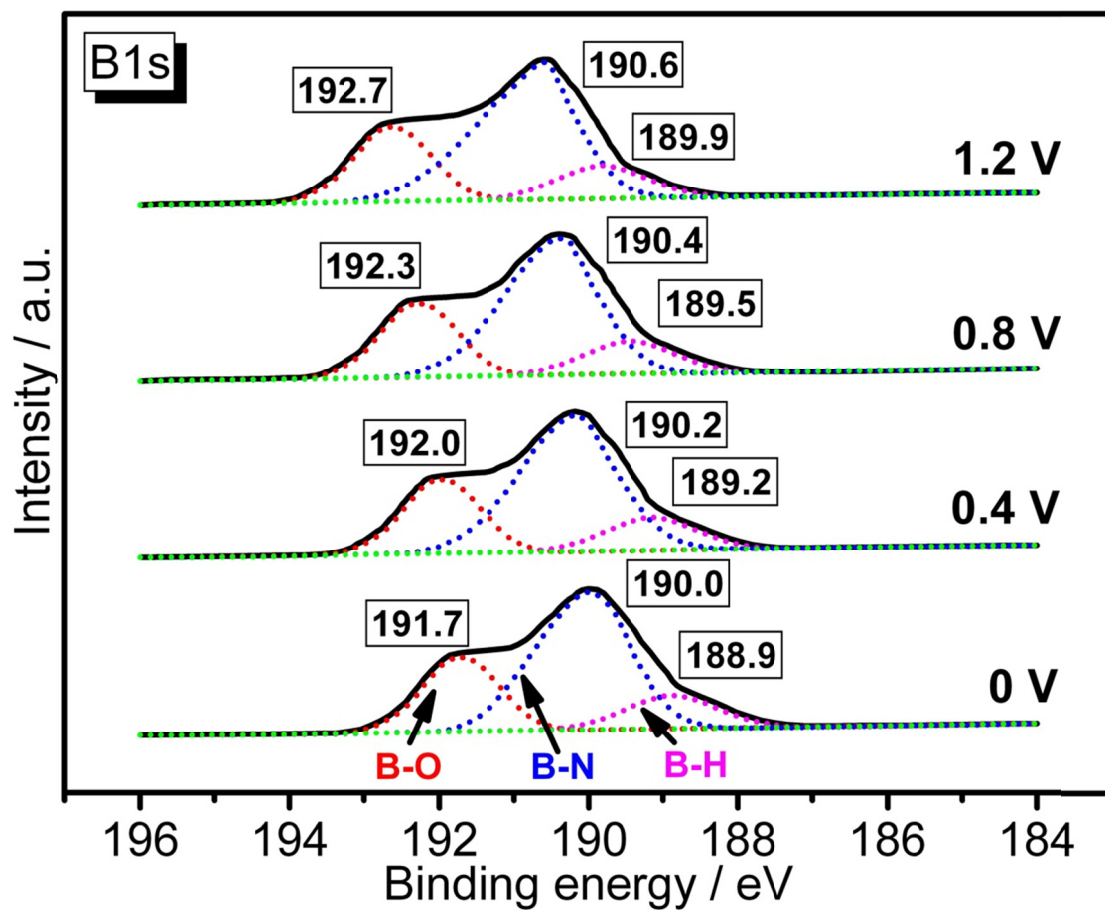

**Fig.S20** B 1s XPS of amorphous B-N-O-H nanofoams after being charged in 600mgL<sup>-1</sup> MB at different voltages.

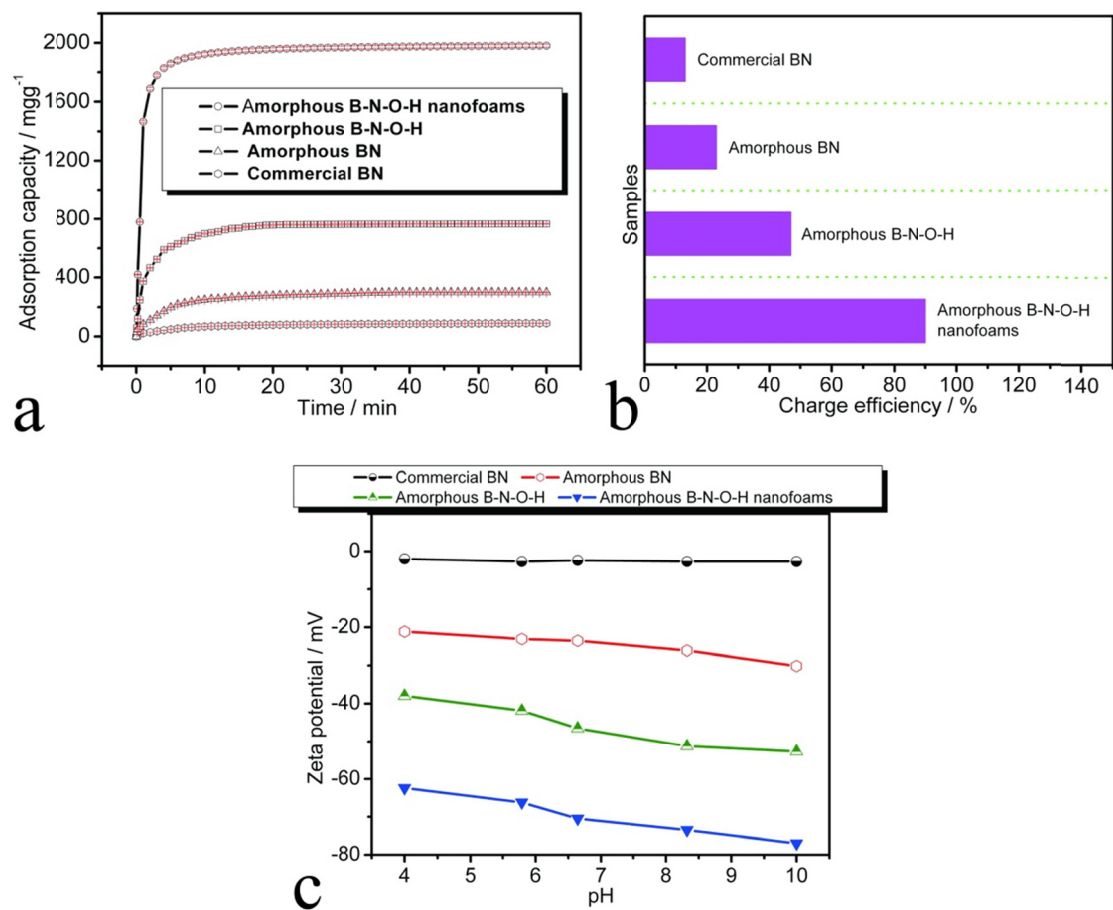

**Fig.S21** (a) The MB electrosorption capacity vs. time profiles (the red mark represents error bars of capacity); (b) Charge efficiency and (c) Zeta potential vs. pH profiles for amorphous B-N-O-H nanofoams, amorphous B-N-O-H, amorphous BN and commercial BN, respectively.

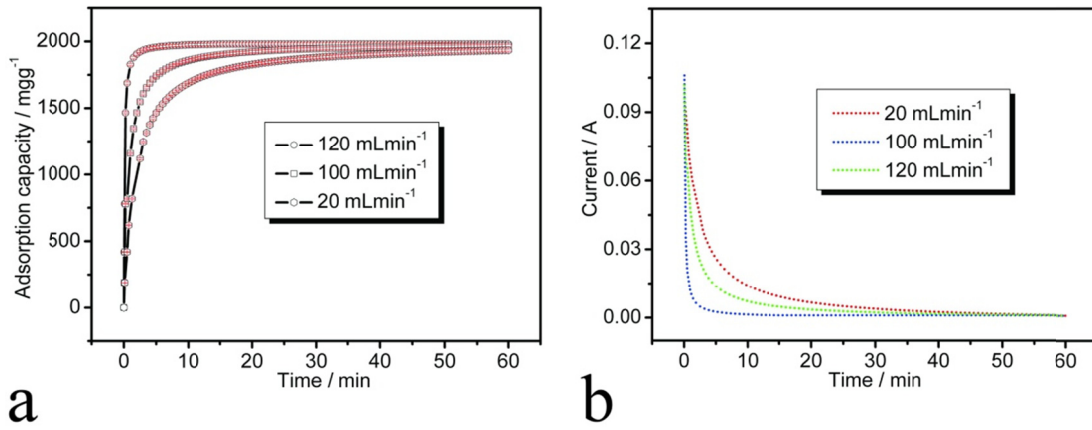

**Fig.S22** Effect of flow rate on (a) electro-adsorption capacity (the red mark represents error bars of capacity) and (b) I-t relationships of B-N-O-H nanofoams.

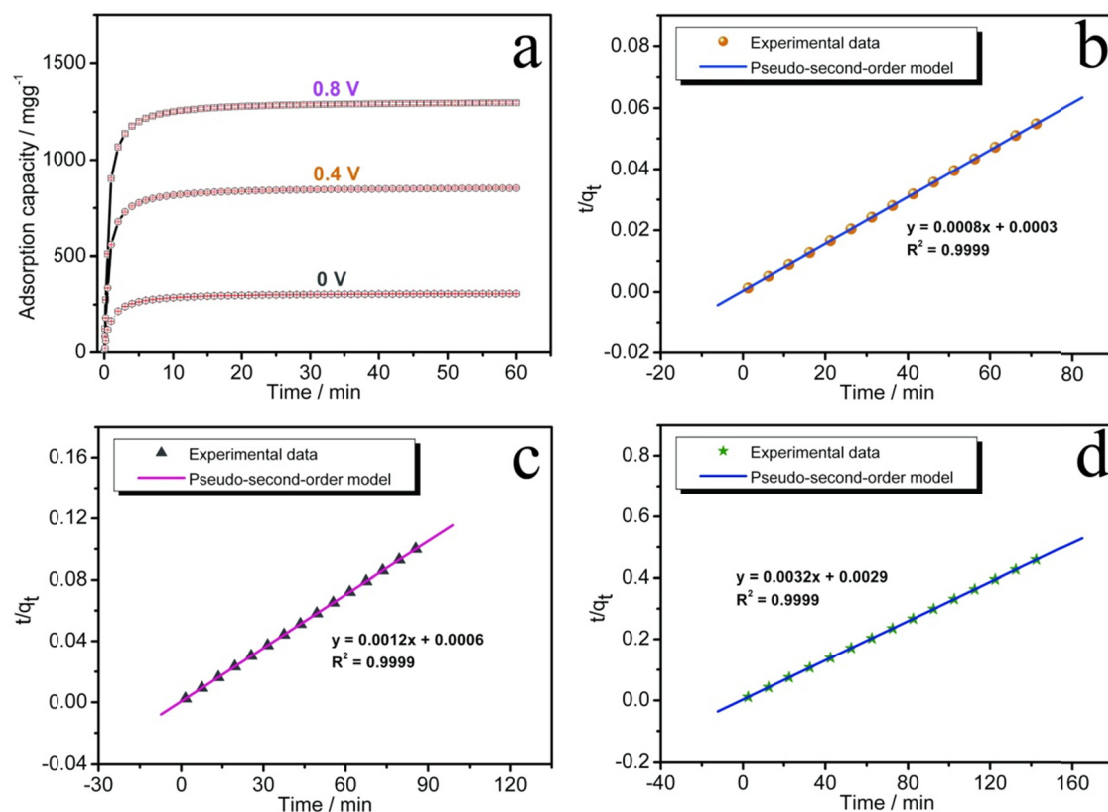

**Fig.S23** (a) Electro-adsorption isotherm on B-N-O-H-nanofoams towards  $600 \text{ mgL}^{-1}$  MB aqueous solution at different Bias potentials (the red mark represents error bars of capacity); (b) The pseudo-second-order electro-adsorption kinetics fitting for MB over B-N-O-H-nanofoams at 0.8 V; (c) The pseudo-second-order electro-adsorption kinetics fitting for MB over B-N-O-H-nanofoams at 0.4 V; and (d) The pseudo-second-order electro-adsorption kinetics fitting for MB over B-N-O-H-nanofoams at 0 V.

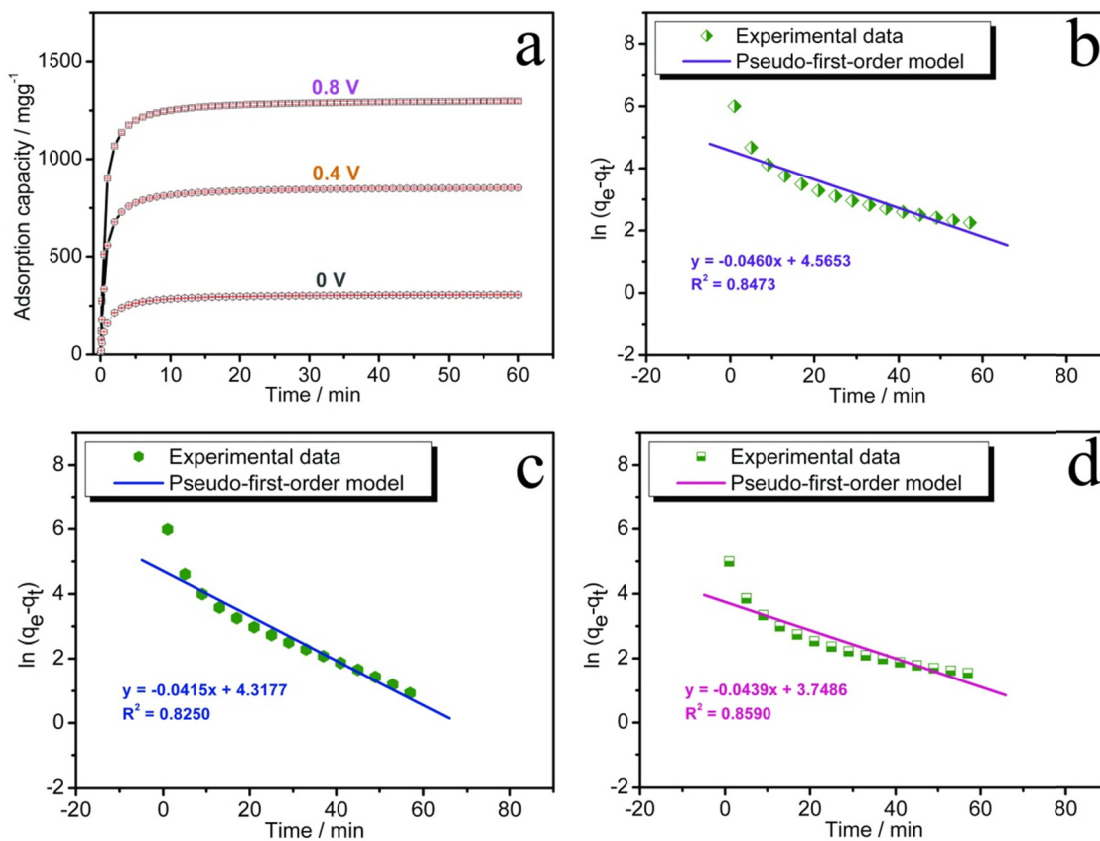

**Fig.S24** (a) Electro-adsorption isotherm on B-N-O-H-nanofoams towards  $600 \text{ mgL}^{-1}$  MB aqueous solution at different Bias potentials (the red mark represents error bars of capacity); (b) The pseudo-first-order electroadsorption kinetics fitting for MB over B-N-O-H-nanofoams at 0.8 V; (c) The pseudo-first-order electroadsorption kinetics fitting for MB over B-N-O-H-nanofoams at 0.4 V; and (d) The pseudo-first-order electroadsorption kinetics fitting for MB over B-N-O-H-nanofoams at 0 V.



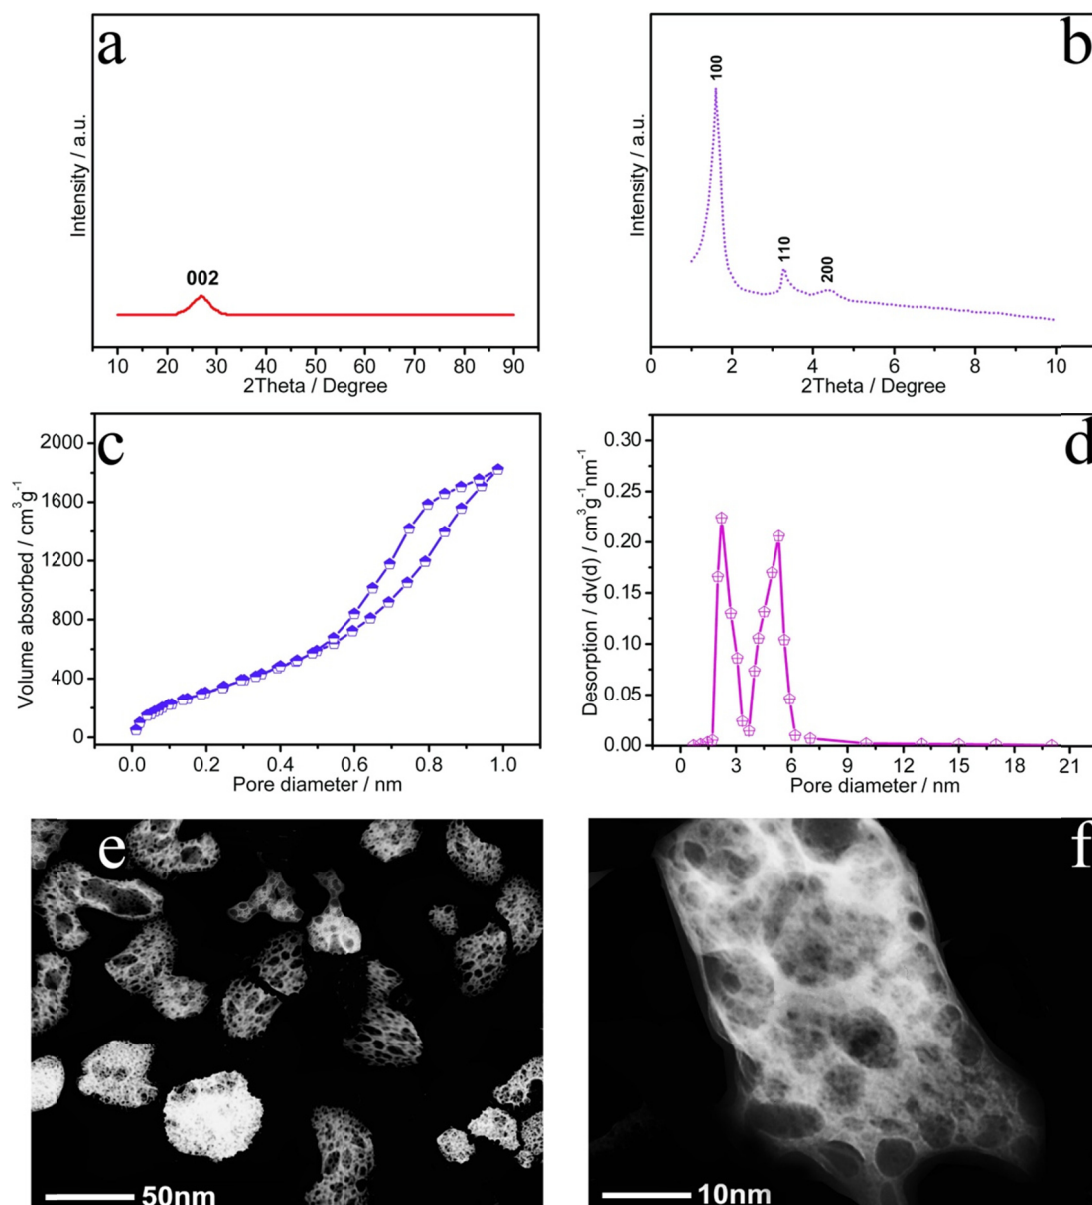

**Fig.S25** (a) XRD profile, (b) Small angle XRD profile, (c) Nitrogen sorption isotherm, (d) Pore size distribution, (e) STEM image and (f) enlarged STEM image of B-N-O-H nanofoams after 10 cycles.

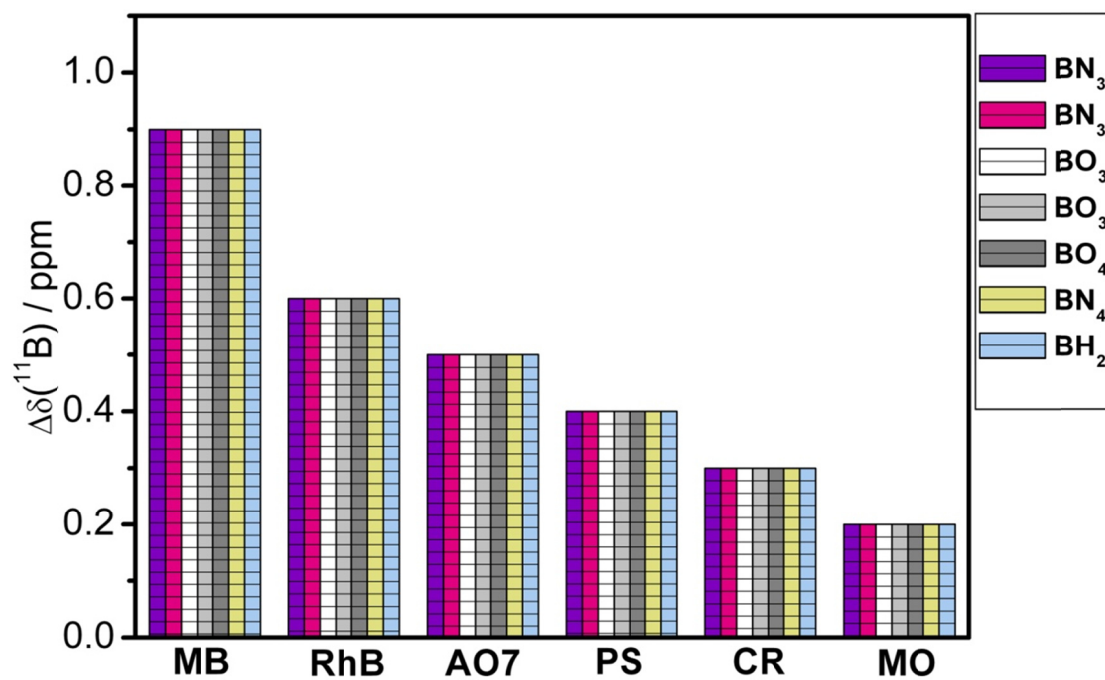

**Fig.S26** Solid state  $^{11}\text{B}$  NMR shifts for B-N-O-H nanofoams before and after adsorbing different dyes.

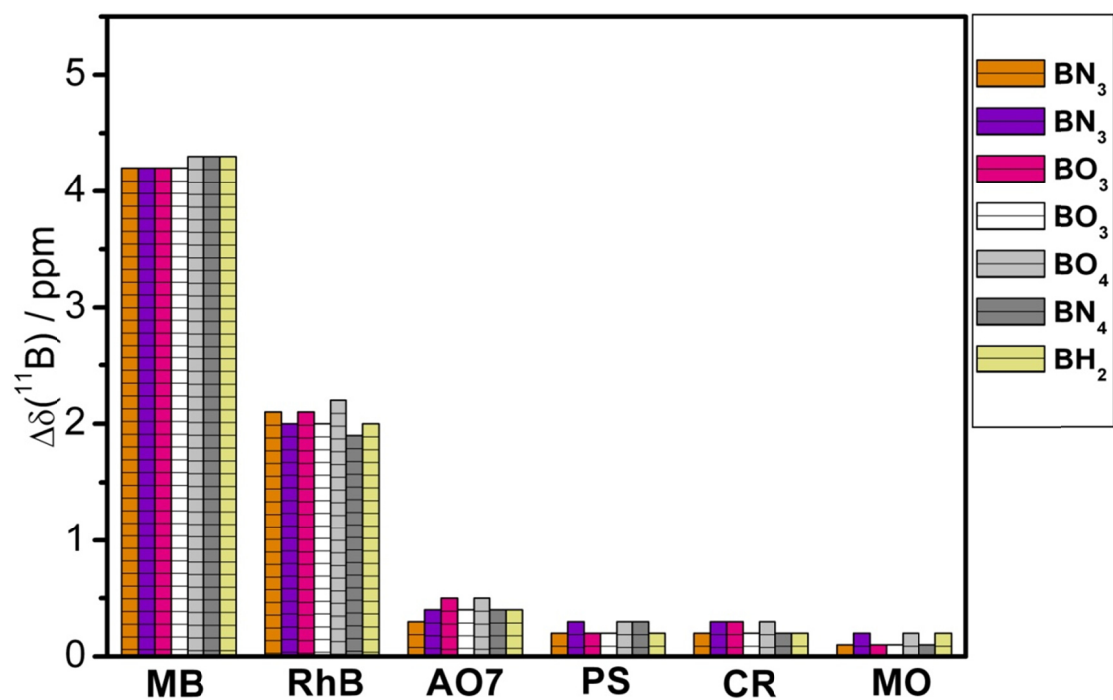

**Fig.S27** Solid state  $^{11}\text{B}$  NMR shifts for B-N-O-H nanofoams after being charged in  $600\text{mgL}^{-1}$  different dyes at 0 V and 1.2 V, respectively.

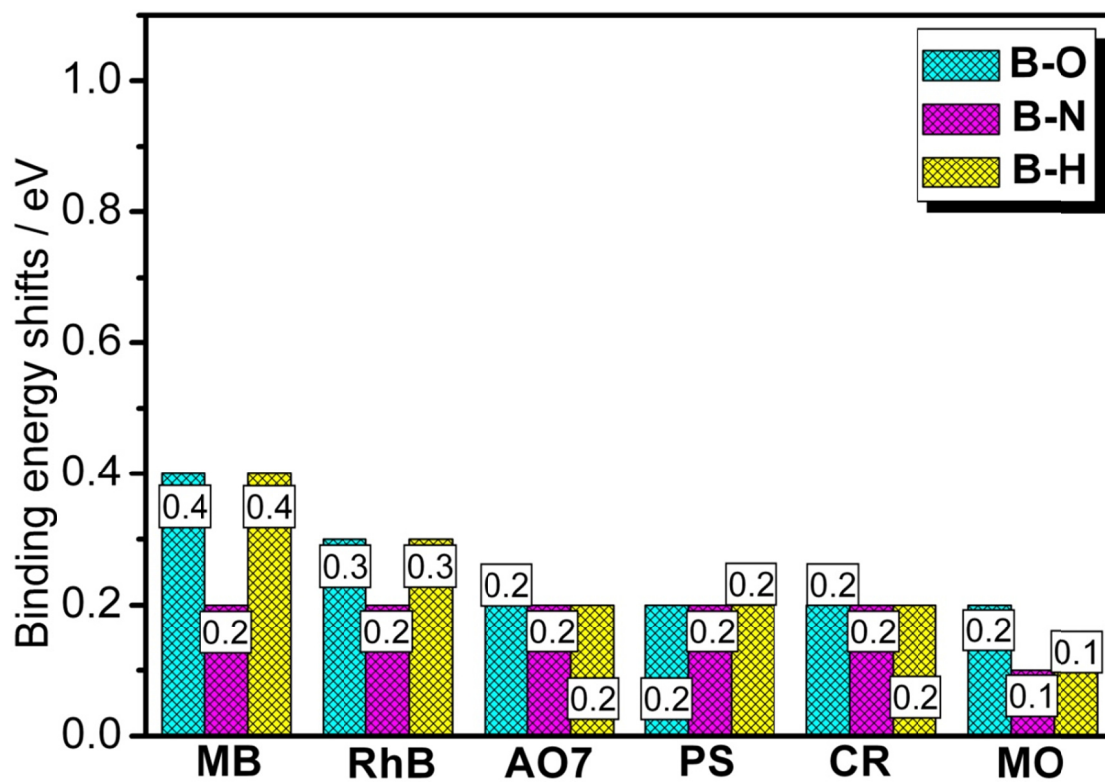

**Fig.S28** Binding energy shifts of B 1s for B-N-O-H nanofoams before and after adsorbing different dyes.

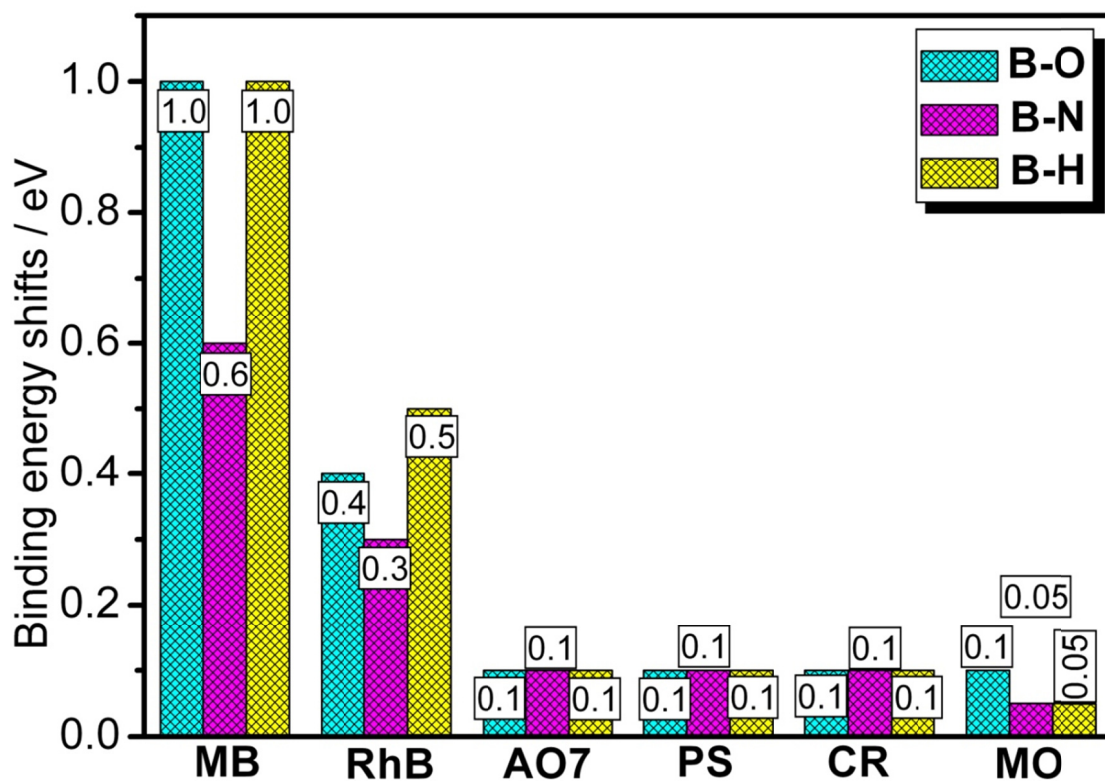

**Fig.S29** Binding energy shifts of B 1s for B-N-O-H nanofoams after being charged in  $600\text{mgL}^{-1}$  different dyes at 0 V and 1.2 V, respectively.

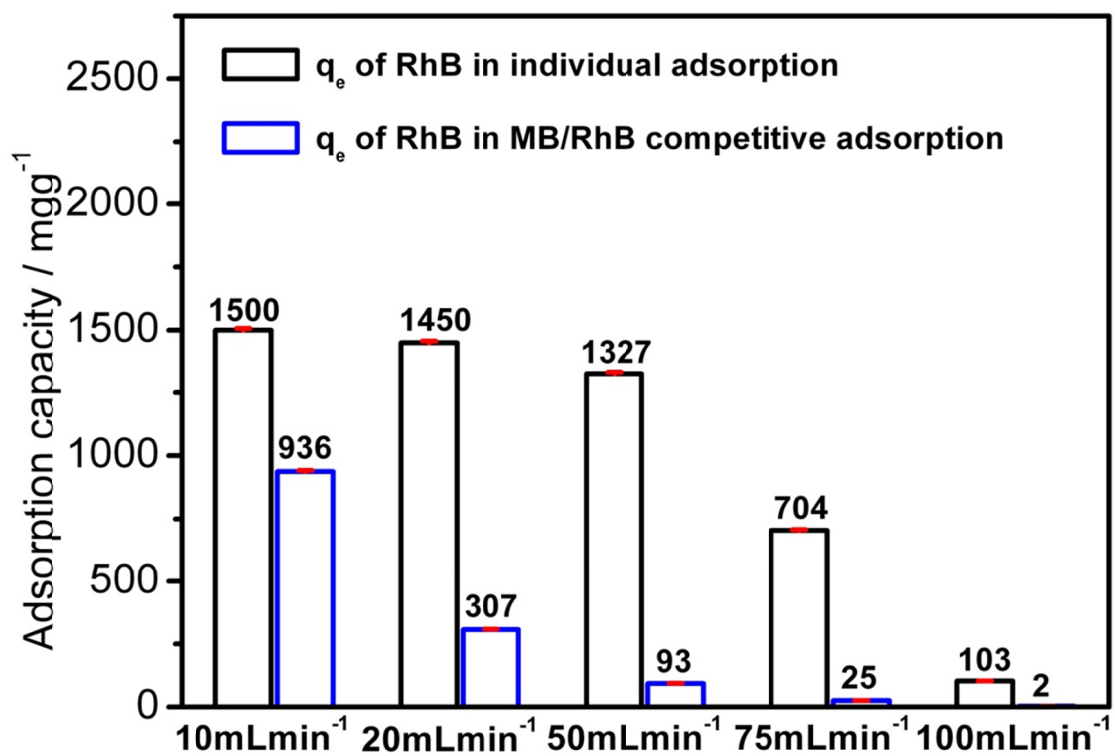

**Fig.S30** Comparison of the RhB electrosorption capacities over B-N-O-H nanofoams in the individual and competitive adsorption in 600mgL<sup>-1</sup> RhB at 1.2 V with different flow rates (the red mark represents error bars of capacity).

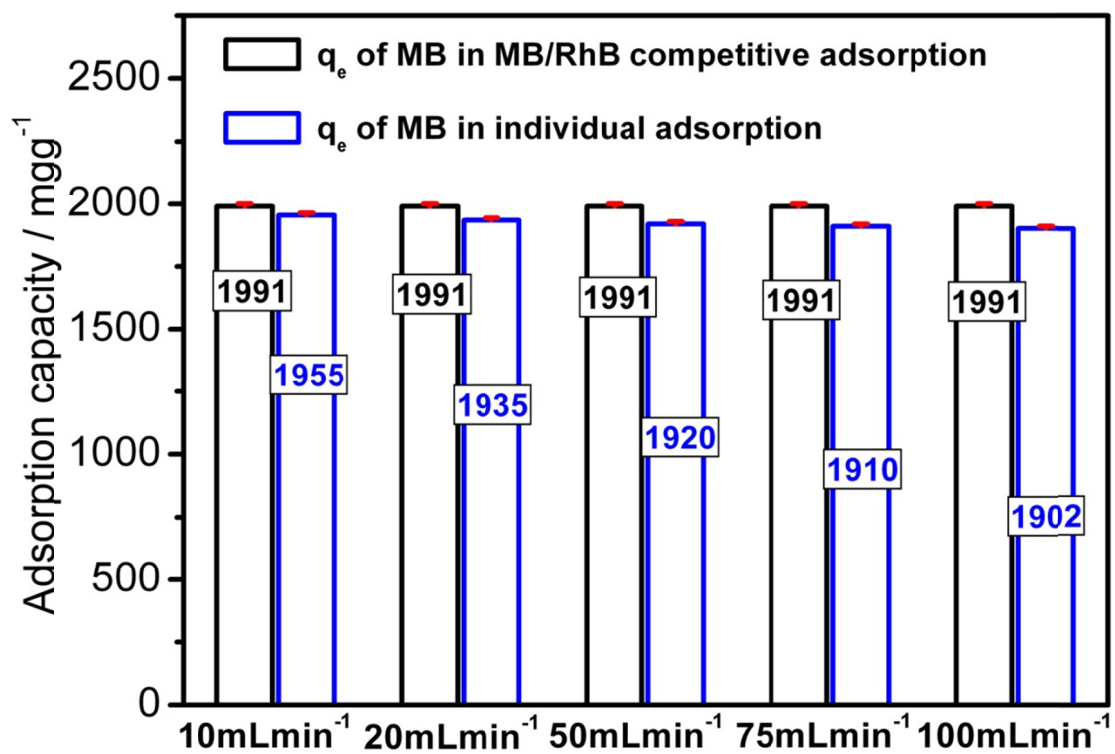

**Fig.S31** Comparison of the MB electrosorption capacities over B-N-O-H nanofoams in the individual and competitive adsorption in 600mgL<sup>-1</sup> RhB at 1.2 V with different flow rates (the red mark represents error bars of capacity).

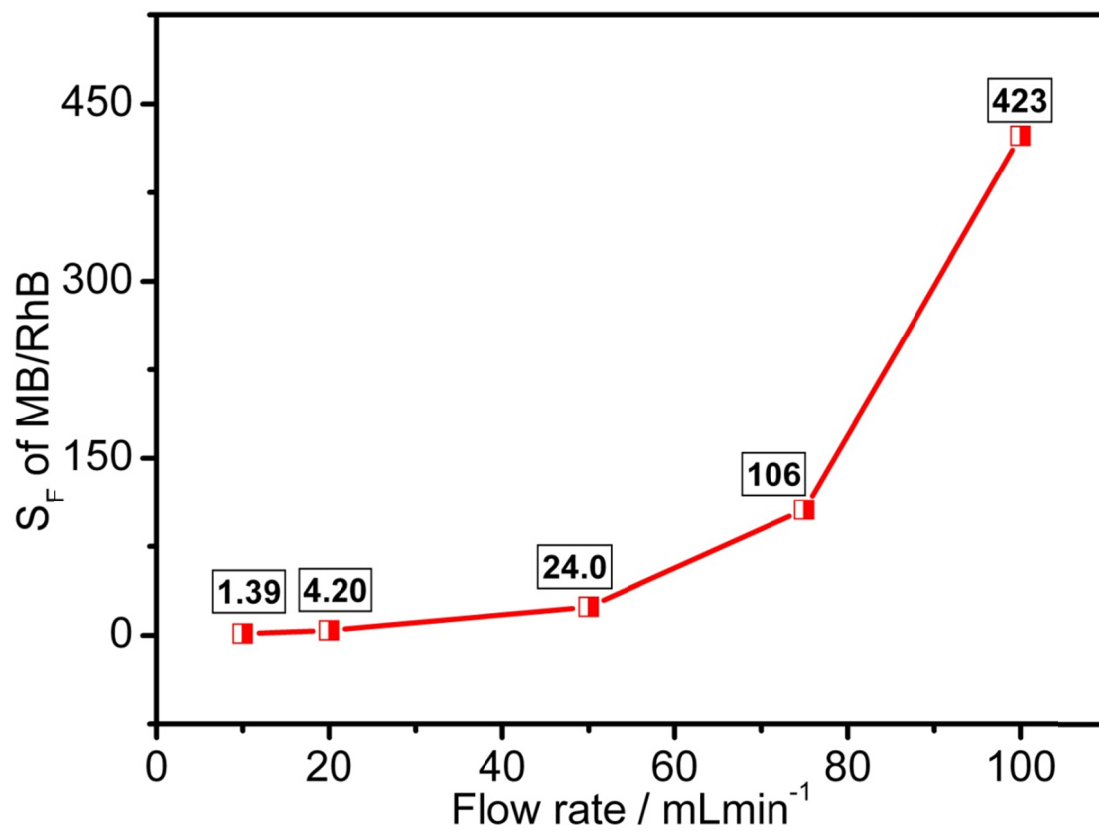

**Fig.S32** The separation factors ( $S_F$ ) of MB/RhB calculated from their competitive adsorption capacity over B-N-O-H nanofoams after being charged at 1.2 V with different flow rates.
